# Supplementary material for: Bayesian estimation of gene constraint from an evolutionary model with gene features
Source: PubMed Central journal article supplement (PMC10312940; doi:10.21203/rs.3.rs-3012879/v1), 2023-06-13
Supplement: NIHPPRS3012879V1-supplement-1.pdf [file NIHPPRS3012879V1-supplement-1.pdf]

## 884 Supplementary Material

### 885 A Empirical Bayes with NGBBoost

#### 886 Empirical Bayes overview

In the simplest version of empirical Bayes, we specify the form of the prior distribution and assume that that prior is shared across all genes—for example, for gene  $i$  we might assume the prior distribution is  $s_{\text{het}}^{(i)} \sim \text{LogitNormal}(\mu, \sigma)$  with density  $p_{\mu, \sigma}(s_{\text{het}}^{(i)})$ , where the  $\text{LogitNormal}(\mu, \sigma)$  distribution is defined such that  $\text{logit}(s_{\text{het}}^{(i)}) = \log(s_{\text{het}}^{(i)} / (1 - s_{\text{het}}^{(i)}))$  is normally distributed with mean  $\mu$  and variance  $\sigma^2$ . We can then estimate  $\mu$  and  $\sigma$  using the observed LOF data for each gene,  $\mathbf{y}_1, \dots, \mathbf{y}_M$ , by maximizing the marginal likelihood:

$$\prod_{i=1}^M \int_0^1 p(\mathbf{y}_i | s_{\text{het}}^{(i)}) p_{\mu, \sigma}(s_{\text{het}}^{(i)}) ds_{\text{het}}^{(i)}. \quad (1)$$

Next, we can compute the posterior distribution of  $s_{\text{het}}^{(i)}$  for each gene,

$$p(s_{\text{het}}^{(i)} | \mathbf{y}_i) = \frac{p(\mathbf{y}_i | s_{\text{het}}^{(i)}) p_{\mu, \sigma}(s_{\text{het}}^{(i)})}{\int_0^1 p(\mathbf{y}_i | s_{\text{het}}^{(i)}) p_{\mu, \sigma}(s_{\text{het}}^{(i)}) ds_{\text{het}}^{(i)}}. \quad (2)$$

887 However, rather than learning the parameters for the prior from only the LOF data, we can also  
888 use gene features to learn gene-specific prior parameters,  $\mu_i$  and  $\sigma_i$ . To do this, we used a machine  
889 learning approach, NGBBoost, to learn functions  $f$  and  $g$  such that  $\mu_i = f(\mathbf{x}_i)$  and  $\sigma_i = g(\mathbf{x}_i)$ , where  
890  $\mathbf{x}_i$  is a vector of gene features associated with gene  $i$ . In the next few sections, we will describe  
891 how we learned  $f$  and  $g$ .

#### 892 NGBBoost

893 NGBBoost (Natural Gradient Boosting) is an approach for training gradient boosted trees to predict  
894 the parameters of a probability distribution [17]. Gradient boosted trees are a type of machine  
895 learning model typically used to predict outcomes  $y$ , from features  $X$ , producing point estimates  
896 such as predictions of  $\mathbb{E}[y | X]$ ; in contrast, NGBBoost uses gradient boosted trees to predict  $p(y |$   
897  $X = \mathbf{x})$  by learning parameters of  $p(y | X = \mathbf{x})$  as functions of  $\mathbf{x}$ —in other words, NGBBoost allows  
898 us to learn the full distribution of  $y$  conditioned on observing the features  $\mathbf{x}$ .

Specifically, for gene  $i$ , we assume the prior distribution is  $s_{\text{het}}^{(i)} \sim \text{LogitNormal}(\mu_i, \sigma_i)$ , with density  $p_{\mu_i, \sigma_i}(s_{\text{het}}^{(i)})$ .  $\mu_i = f(\mathbf{x}_i)$  and  $\sigma_i = g(\mathbf{x}_i)$  are functions of the vector of gene features  $\mathbf{x}_i$ , where  $f$  and  $g$  are parameterized as gradient-boosted trees. We chose this distribution as previous work has suggested that  $s_{\text{het}}^{(i)}$  is distributed on a logarithmic scale [1, 2, 4], yet,  $s_{\text{het}}^{(i)}$  is also bounded between 0 and 1. Both of these properties are enforced by the LogitNormal distribution. In Supplementary Note B, we develop a population genetic likelihood  $p(\mathbf{y}_i | s_{\text{het}}^{(i)})$ , where  $\mathbf{y}_i$  is a vector that represents the observed frequencies of each possible loss of function variant for the gene.

Then, with  $M$  genes in the training set, the score that NGBoost maximizes during training is:

$$\sum_{i=1}^M S(\mathbf{y}_i; \mu_i, \sigma_i) = \sum_{i=1}^M \log p(\mathbf{y}_i) = \sum_{i=1}^M \log \left( \int_0^1 p(\mathbf{y}_i | s_{\text{het}}^{(i)}) p_{\mu_i, \sigma_i}(s_{\text{het}}^{(i)}) ds_{\text{het}}^{(i)} \right). \quad (3)$$

To do this, NGBoost first initializes the parameters of  $f$  and  $g$  such that all genes have the same prior distribution. Next, NGBoost adopts a gradient descent approach to maximize the score function: for each iteration until training ends, NGBoost first computes the natural gradient of gene  $i$ 's score with respect to the parameters  $\mu_i$  and  $\sigma_i$  of  $p_{\mu_i, \sigma_i}(s_{\text{het}}^{(i)})$ , where the natural gradient of  $S = S(\mathbf{y}_i; \mu_i, \sigma_i)$ , is defined as:

$$\tilde{\nabla} S \propto \mathcal{I}_{\mu_i, \sigma_i}^{-1} \nabla_{\mu_i, \sigma_i} S \quad (4)$$

where

$$\mathcal{I}_{\mu_i, \sigma_i} = \mathbb{E}_{s_{\text{het}}^{(i)} \sim p_{\mu_i, \sigma_i}} \left[ \left( \nabla_{\mu_i, \sigma_i} \log p_{\mu_i, \sigma_i}(s_{\text{het}}^{(i)}) \right) \left( \nabla_{\mu_i, \sigma_i} \log p_{\mu_i, \sigma_i}(s_{\text{het}}^{(i)}) \right)^T \right] \quad (5)$$

999 is the Fisher Information Matrix for  $p_{\mu_i, \sigma_i}(s_{\text{het}}^{(i)})$  and  $\nabla_{\mu_i, \sigma_i}$  represents differentiation with respect to  
 900  $\mu_i$  and  $\sigma_i$ . Natural gradients take into account the underlying ‘‘information geometry’’ of the space  
 901 of distributions in a way that standard gradients do not [85]. As an example, changing the variance  
 902 of a Normal distribution from 0.1 to 0.2 is much more dramatic than changing the variance from  
 903 10.1 to 10.2. After computing the natural gradient, NGBoost fits a decision tree to each dimension  
 904 of the natural gradient, updating  $\mu_i$  and  $\sigma_i$  in the direction that most steeply increases the gene’s  
 905 score. While gradient-boosting algorithms (including NGBoost, by default) typically fit a single  
 906 decision tree at each iteration, we allow NGBoost to fit one or more trees, which performs slightly  
 907 better in practice (see ‘‘Training and Validation’’ in Methods).

908 Below, we summarize the training algorithm. Let  $\mu_i^{(t)}, \sigma_i^{(t)}$  denote the parameters of the prior at  
 909 training iteration  $t$ .

910 1. Initialize parameters for all genes,  $i = 1, \dots, M$ :

911  $\mu_i^{(0)}, \sigma_i^{(0)} = \operatorname{argmax}_{\mu, \sigma} \sum_{i=1}^M S(\mathbf{y}_i; \mu, \sigma)$

912 2. For iterations  $t = 1, \dots, T$ :

913 (a) For each gene, calculate natural gradients of the score:

914  $\tilde{\nabla} S(\mathbf{y}_i; \mu_i^{(t)}, \sigma_i^{(t)})$ , whose two components we denote as  $\tilde{\nabla} S_{\mu}$  and  $\tilde{\nabla} S_{\sigma}$

915 (b) Fit decision trees  $f^{(t)}$  and  $g^{(t)}$  on the natural gradients:

916  $f^{(t)} = \operatorname{fit} \left( \left\{ \mathbf{x}_i, \tilde{\nabla} S_{\mu_i} \right\}_{i=1}^M \right)$

917  $g^{(t)} = \operatorname{fit} \left( \left\{ \mathbf{x}_i, \tilde{\nabla} S_{\sigma_i} \right\}_{i=1}^M \right)$

918 (c) Update the parameters for each gene, where  $\eta$  is a learning rate that is chosen by the  
 919 user as a hyperparameter

920  $\mu_i^{(t)} = \mu_i^{(t-1)} - \eta f^{(t)}(\mathbf{x}_i)$

921  $\sigma_i^{(t)} = \sigma_i^{(t-1)} - \eta g^{(t)}(\mathbf{x}_i)$

Once training is complete, we obtain a learned prior with parameters  $\mu_i^{(T)}, \sigma_i^{(T)}$ , and can compute the posterior distribution of  $s_{\text{het}}$

$$p\left(s_{\text{het}}^{(i)} \mid \mathbf{y}_i\right) = \frac{p\left(\mathbf{y}_i \mid s_{\text{het}}^{(i)}\right) p_{\mu_i^{(T)}, \sigma_i^{(T)}}\left(s_{\text{het}}^{(i)}\right)}{p\left(\mathbf{y}_i\right)} \quad (6)$$

as well as the mean of this distribution

$$\mathbb{E}\left[s_{\text{het}}^{(i)} \mid \mathbf{y}_i\right] = \int_0^1 s_{\text{het}}^{(i)} p\left(s_{\text{het}}^{(i)} \mid \mathbf{y}_i\right) ds_{\text{het}}^{(i)} \quad (7)$$

922 To compute 95% Credible Intervals, we compute the CDF of the posterior distribution using  
 923 Pytorch’s `cumulative_trapezoid` function [86]. Then, the 95% Credible Interval per gene is de-  
 924 fined as  $[\text{lb}^{(i)}, \text{ub}^{(i)}]$  such that  $P(s_{\text{het}}^{(i)} < \text{lb}^{(i)}) = 0.025$  and  $P(s_{\text{het}}^{(i)} < \text{ub}^{(i)}) = 0.975$ .

## 925 NGBBoost— implementation details

926 To initialize parameters (step 1 in the training algorithm), we perform gradient descent with the  
 927 AdamW optimizer [87] implemented in PyTorch [86] with a learning rate of  $5 \times 10^{-4}$  and other-  
 928 wise default settings. We initialize the optimization at  $\mu = -5$  and  $\sigma = 0.5$ .

929 To compute the integrals in the score calculation, we use the `torchquad` package for numerical  
 930 integration [88], which allows us to use PyTorch’s automatic differentiation system to compute  
 931 gradients. We perform integration using Boole’s rule, integrating from  $5 \times 10^{-8}$  to  $1 - 5 \times 10^{-8}$   
 932 with  $10^6$  sample points.

933 The Fisher Information Matrix is approximated using a Monte Carlo approach: we sample  $s_{\text{het}}$   
 934 from the prior 1,000 times, compute the gradient for each sample, and approximate the expectation  
 935 using the sample mean.

936 To flexibly fit decision trees at each training iteration, we use the XGBoost package, a library  
 937 used for fitting standard gradient boosted trees [89]. In comparison to the default NGBBoost learner,  
 938 XGBoost supports missing features and allows for adjustment of numerous hyperparameters (see  
 939 “Training and Validation” in Methods). In contrast to typical applications of XGBoost, we only  
 940 allow a few (1-4) trees to be fit at each training iteration, as we are using XGBoost within a training  
 941 loop rather than as a standalone approach for model fitting.

942 All distributions were implemented using PyTorch, and training was conducted with GPU  
 943 support when available, with `tree_method = "gpu_hist"` for the XGBoost learners.

## 944 B Population Genetics Model

### 945 Overview of model

946 Some of the most commonly used measures of gene constraint (pLI [11], LOEUF [12]) are framed  
947 in terms of the number of unique LOFs observed in gene,  $O$ , relative to the number expected  
948 under a null model,  $E$ . While operationalizing constraint as some function of  $O$  and  $E$  captures the  
949 intuition that seeing fewer LOFs than expected is evidence that a gene is conserved, the numerical  
950 values of pLI and LOEUF are difficult to interpret. In practice this means that such measures  
951 can be useful for ranking which genes are important, but it makes it difficult to contextualize  
952 these results in terms of other types of variants, such as missense or noncoding variants, or copy  
953 number variants. Previous approaches have pioneered using a population genetics model in this  
954 context to obtain interpretable estimates, albeit with different technical details that we discuss  
955 below [1,2,4].

In order to obtain a more interpretable measure of constraint, we formalize constraint as the strength of natural selection acting against gene loss-of-function in a population genetics model. That is, we can ask how much fitness is reduced on average for an individual with one or two non-functional copies of a gene relative to individuals with two functional copies, following previous work [1,2,4]. To tie this concept of constraint to observed allele frequency data, we use a slightly simplified version of the discrete-time Wright Fisher model. This model contains mutation, selection, and genetic drift, and assumes that there are only two alleles and that the population is panmictic, monoecious, and has non-overlapping generations. While all of these assumptions are violated in humans (there are four nucleotides, population structure, two sexes, and overlapping generations), the model still provides a good approximation to allele frequency dynamics through time. If the allele frequency in generation  $k$  is  $f_k$ , then we model the allele frequency in the next generation via binomial sampling:

$$2N_{k+1}f_{k+1} \sim \text{Binomial}(2N_{k+1}, p(f_k)), \quad (8)$$

956 where  $N_{k+1}$  is the number of diploid individuals in generation  $k + 1$ , with

$$p(f_k) := \frac{(1 - s_{\text{het}})\tilde{f}_k(1 - \tilde{f}_k) + (1 - s_{\text{hom}})\tilde{f}_k^2}{(1 - \tilde{f}_k)^2 + 2(1 - s_{\text{het}})\tilde{f}_k(1 - \tilde{f}_k) + (1 - s_{\text{hom}})\tilde{f}_k^2},$$

957 where  $\tilde{f}_k = f_k(1 - \mu_{1 \rightarrow 0}) + \mu_{0 \rightarrow 1}(1 - f_k)$  is the allele frequency after alleles change from non-  
958 LOF to LOF at rate  $\mu_{0 \rightarrow 1}$  and from LOF to non-LOF at rate  $\mu_{1 \rightarrow 0}$ . The function  $p(\cdot)$  arises from  
959 considering bidirectional mutation and approximating a model of diploid selection where the  
960 relative reproductive success of individuals with 0, 1, or 2 copies of the LOF are 1,  $1 - s_{\text{het}}$ , and  $1 -$   
961  $s_{\text{hom}}$  respectively [13]. In practice, most LOF variants are extremely rare, and so it is exceedingly  
962 unlikely to find individuals homozygous for the LOF. This makes estimating  $s_{\text{hom}}$  as a separate  
963 parameter very difficult, and so we instead assume that  $s_{\text{hom}} = \min\{2s_{\text{het}}, 1\}$ . This is equivalent  
964 to assuming genic selection (i.e., additive fitness effects) with the constraint that an individual's  
965 relative fitness cannot be lower than 0.

966 Equation 8 fully specifies the model except for an initial condition. That is, we need to know  
967 what the distribution of frequencies is in generation 0. One mathematically appealing choice

968 would be to assume that the population is at equilibrium at time 0, but this seemingly straight-  
969 forward choice results in nonsensical conclusions. To see why, if the mutation rates are low and  
970 selection is negligible, then at equilibrium, with extremely high probability the population will  
971 either be in a state where the frequency of the LOF allele is very close to zero or in a state where  
972 the frequency of the LOF allele is very close to one. If the mutation rates between the two alleles  
973 are close to equal, then these two cases happen roughly equally often. That is, we would expect  
974 there to be a  $\sim 50\%$  chance that the population is fixed or nearly fixed for the LOF mutation. If  
975 there are multiple independently evolving sites at which an LOF could arise (or if there are many  
976 more ways to mutate to an LOF state than a non-LOF state), then the chance that any of these sites  
977 is fixed or nearly fixed for an LOF rapidly approaches 100%. Under this equilibrium assumption,  
978 we thus reach the absurd conclusion that the mere act of observing a gene that is functional in a  
979 majority of the population is overwhelming evidence that the gene is strongly selected for. An-  
980 other way of viewing this is that in reality we can only observe genes that are functional in an  
981 appreciable fraction of the population, and so we should somehow be conditioning on this event,  
982 whereas the equilibrium assumption looks at a given randomly chosen stretch of DNA and asks  
983 whether it could be a gene given some set of mutations. Indeed, any randomly chosen stretch of  
984 DNA could be made a gene through a series of mutations, but for any given stretch it would be  
985 extremely unlikely to be a functional gene, and the equilibrium assumption exactly captures how  
986 rare this would be.

987 We instead use the equilibrium of another process as the initial condition, which avoids these  
988 conceptual pitfalls. We assume the distribution of frequencies at generation 0 is the equilibrium  
989 conditioned on the LOF allele never reaching fixation in the population. We then compute the like-  
990 lihood of observing a given present-day frequency while continuing to condition on non-fixation  
991 of the LOF allele. This assumption implies that no matter the current frequency of the LOF vari-  
992 ant, we know that at some point in the past the population was fixed for the functional version of  
993 the gene, and the LOF variant can thus be thought of as being “derived” and the non-LOF variant  
994 “ancestral”. In the limit of infinitely low (but non-zero) mutation rates, this assumption become  
995 equivalent to the commonly assumed “infinite sites” model commonly used to compute frequency  
996 in population genetics [90]. In contrast to the infinite sites model, where the probability that any  
997 given site is segregating must be 0, our model allows us to compute the probability that a given  
998 site is segregating. Furthermore, we can easily model recurrent mutation which can be important  
999 for sites with large mutation rates (such as CpGs) and large sample sizes [91], whereas under the  
1000 infinite sites model each mutation necessarily happens at a unique position in the genome, ruling  
1001 out the possibility of recurrent mutation. Below we will write  $p_{DTWF}(y | s_{\text{het}})$  for the probability  
1002 mass function computed using this procedure, with “DTWF” representing Discrete-Time Wright-  
1003 Fisher, and  $y$  being an observed LOF allele frequency.

1004 Equation 8 is easy to describe and simulate under, and a very similar model has been used  
1005 in an approximate Bayesian computation approach to estimate  $s_{\text{het}}$  [4]. While simulation is easy,  
1006 computing likelihoods under this model is difficult for large sample sizes, and unfortunately we  
1007 need explicit likelihoods in our empirical Bayes approach. In recent work [16], we have developed  
1008 an efficient method for computing likelihoods under this model. The key idea is that the above  
1009 dynamics can be written as

$$\mathbf{v}_{k+1} = \mathbf{M}_k^T \mathbf{v}_k$$

1010 where  $\mathbf{v}_k$  is a vector of dimension  $2N + 1$  where entry  $i$  is the probability that there are  $i$  haploids

1011 that have the LOF allele in generation  $k$ , and  $\mathbf{M}_k$  is a matrix where row  $i$  is the the probability mass  
1012 function of the Binomial distribution in Equation 8 given that the allele frequency in generation  
1013  $k$  is  $i/2N_k$ . This formulation makes clear that we can obtain the likelihood of observing a given  
1014 frequency at present given some initial distribution by performing a series of matrix-vector multi-  
1015 plications. Naively this would be prohibitively slow as  $\mathbf{M}_k$  can be as large as  $10^7 \times 10^7$ , but in [16]  
1016 we show that  $\mathbf{M}_k$  is approximately highly structured — it is both approximately extremely sparse  
1017 and approximately extremely low rank. Combining these insights we can perform matrix-vector  
1018 multiplication that is provably accurate while reducing the runtime for matrix-vector multiplica-  
1019 tion from  $O(N_k^2)$  to  $O(N_k)$ . Similar insights can be used to speed up the computation of equilibria,  
1020 which we discuss in detail in [16]. Furthermore, as discussed above, we actually want to com-  
1021 pute likelihoods conditioned on non-fixation of the LOF allele, but that is as simple as setting the  
1022 column of  $\mathbf{M}_k$  corresponding to fixation to 0, and then renormalizing  $\mathbf{v}$ . We precompute these  
1023 likelihoods for each possible pair of mutation rates (to and from the LOF allele) across a range of  
1024  $s_{\text{het}}$  values (100 log-linearly spaced points between  $10^{-8}$  and 1, as well as 0). We describe how we  
1025 set the mutation rates and the population sizes implicit in  $\mathbf{M}_k$  below.

## 1026 Modeling misannotation of LOFs

1027 Under the likelihood described above, and as seen in Figure 2A, positions where a LOF variant  
1028 could occur, but no LOF alleles are observed are slight evidence in favor of selection, while high  
1029 frequency variants are extremely strong evidence against selection. Meanwhile, we suspect that  
1030 many variants that are annotated as causing LOF actually have little to no effect on the gene prod-  
1031 uct due to some form of misannotation. If these misannotated variants evolve effectively neutrally,  
1032 they can reach high frequencies and cause us to artifactually infer artificially low levels of selec-  
1033 tion. These misannotated variants can be particularly problematic for approaches that combine  
1034 frequencies across all LOFs within a gene to obtain an aggregate gene-level LOF frequency [1,2,4].

1035 LOEUF [12] and pLI [11] avoid this problem by throwing away all frequency information  
1036 except for whether an LOF is segregating or not. While this approach is more robust, the ignored  
1037 frequency information is extremely useful for estimating the strength of selection. For example,  
1038 consider a gene where we expect to see 5 unique LOFs under neutrality and we see 3 segregating  
1039 LOFs. This might seem like weak or negligible constraint ( $O/E = 0.6$ ), but if those 3 sites are all  
1040 highly mutable and the variants at those sites are each only present in a single individual, then it  
1041 is plausible that this gene is quite constrained.

1042 To take full advantage of the information in the LOF frequencies while remaining robust to  
1043 misannotation, we take a composite likelihood approach [92], closely related to the Poisson ran-  
1044 dom field assumption commonly used in population genetics [90]. We approximate gene-level  
1045 likelihoods as a product of variant level likelihoods

$$p^{(i)}(\mathbf{y}^{(i)} | s_{\text{het}}^{(i)}) \approx \prod_{j=1}^{J_i} p_{\text{variant}}(\mathbf{y}_j^{(i)} | s_{\text{het}}^{(i)}),$$

1046 where  $\mathbf{y}^{(i)}$  is a vector of the observed allele frequencies at each possible LOF site in gene  $i$ , and  
1047  $s_{\text{het}}^{(i)}$  is the selection coefficient for having a heterozygous loss-of-function of gene  $i$ . Under this  
1048 formulation, we can easily model misannotation by assuming that each LOF independently has

1049 some probability of being misannotated,  $p_{\text{miss}}$ , and that misannotated variants evolve neutrally:

$$p_{\text{variant}} \left( \mathbf{y}_j^{(i)} \mid s_{\text{het}}^{(i)} \right) = (1 - p_{\text{miss}}) p_{\text{DTWF}} \left( \mathbf{y}_j^{(i)} \mid s_{\text{het}}^{(i)} \right) + p_{\text{miss}} p_{\text{DTWF}} \left( \mathbf{y}_j^{(i)} \mid 0 \right).$$

1050 Using this formulation, we can take full advantage of the rich information included in the exact  
1051 sample frequencies of each LOF variant, while still being robust to occasional misannotation. In  
1052 practice, we precompute  $p_{\text{variant}}$  using a grid of  $p_{\text{miss}}$  values, and then to obtain the likelihood at  
1053 arbitrary values of  $s_{\text{het}}$  and  $p_{\text{miss}}$  we linearly interpolate in log-likelihood space. Below, we discuss  
1054 our approach for setting  $p_{\text{miss}}$ .

1055 Given a probability of misannoation, we can then calculate a posterior probability that any  
1056 given variant has been misannotated. We include a table of these misannotation probabilities for  
1057 all possible LOFs in Supplementary Table XXX.

1058 As an example of the importance of correcting for misannotation, we consider the case of the  
1059 gene PPFIA3 (ENSG00000177380). This gene has a LOEUF score of 0.12 and so appears very  
1060 constrained, but in an early version of our model where we did not incorporate variant mis-  
1061 annotation, we inferred a posterior mean value of  $s_{\text{het}}$  of  $\sim 2 \times 10^{-4}$ , which is right at the bor-  
1062 der of being nearly neutral. Inspecting the LOF data for this gene, we find that all potential  
1063 LOFs are either not observed or observed in a single individual, except for a single splice donor-  
1064 disrupting variant at 16% frequency. There are no obvious signs indicating that this variant is  
1065 misannotated (e.g., in terms of coverage or mappability). If we model misannotation, however,  
1066 we find that this variant is likely misannotated (posterior probability of misannotation  $> 99.999\%$ ),  
1067 and as a result we estimate extremely strong selection against gene loss-of-function (posterior  
1068 mean  $s_{\text{het}}$  of  $\sim 0.234$ ). Indeed, a single autosomal dominant missense variant in this gene is  
1069 suspected to have caused a number of severe symptoms including developmental delay, intel-  
1070 lectual disability, seizures, and macrocephaly in an Undiagnosed Diseases Network participant  
1071 (<https://undiagnosed.hms.harvard.edu/participants/participant-159/>) [93].

## 1072 Modeling the X chromosome

1073 We must slightly modify our model when applying it to the X chromosome. Because males only  
1074 have one copy of the X chromosome, there are only 3/4 as many X chromosomes as autosomes  
1075 (assuming an approximately equal sex ratio). As a result, when dealing with the X chromosome  
1076 we scale all population sizes to 3/4 of the size used for the autosomes (rounded to the nearest  
1077 integer). We also need to slightly modify the expected frequency in the next generation. We as-  
1078 sume haploid selection in males with strength  $s_{\text{hom}}$ , and diploid selection in females with selection  
1079 coefficients  $s_{\text{het}}$  and  $s_{\text{hom}}$  for individuals heterozygous and homozygous for the LOF variant re-  
1080 spectively. This selection results in modified allele frequencies in the pool of males and females,  
1081 and the we assume that each chromosome in the next generation has 1/3 probability of coming  
1082 from a male, and 2/3 probability of coming from a female. This means that the expected fre-  
1083 quency in the next generation is 1/3 times the post-selection frequency in males plus 2/3 times  
1084 the post-selection frequency in females. Variants within the pseudoautosomal regions on the X  
1085 are modeled identically to variants on the autosomes. Agarwal and colleagues also considered  
1086 selection on the X in the context of LOF variants, with a model similar to that described here [4].

## 1087 Model parameters

1088 Our model has three key parameters — the mutation rate, the demographic model (i.e., population  
1089 sizes through time), and the probability that different variants are misannotated.

1090 We obtained mutation rates from gnomAD [12, Supplemental Dataset 10], which take into ac-  
1091 count trinucleotide context and methylation level (for CpG to TpG mutations). In our population  
1092 genetics model, we assume that there are only two alleles (a functional allele and an LOF allele),  
1093 whereas in reality there are four nucleotides. We approximate the rate of mutating from the func-  
1094 tional allele to the LOF allele as being the sum of the mutation rates from the reference nucleotide  
1095 to any nucleotide that might result in LOF. For example, if the reference allele is A, and either a  
1096 C or a T would result in LOF, then we say that the rate at which the functional allele mutates to  
1097 the LOF allele is the rate at which A mutates to C in this context plus the rate at which A mutates  
1098 to T in this context. For the rate of back mutation from the LOF allele to the functional allele, we  
1099 compute a weighted average of the rates of each possible LOF nucleotide back-mutating to any  
1100 possible non-LOF nucleotide, weighed by the probability that the original non-LOF nucleotide  
1101 mutated to that particular LOF nucleotide. Continuing our previous example, suppose A mutates  
1102 to C at rate  $1 \times 10^{-8}$  and A mutates to T at a rate  $1.5 \times 10^{-8}$ . Then conditioned on there having  
1103 been a single mutation resulting in a LOF variant, there is a  $1/2.5 = 0.4$  chance that the LOF is C  
1104 and 0.6 chance that the LOF is T. We then compute the back mutation rate as 0.4 times the rate at  
1105 which C mutates to A in this context plus the rate at which C mutates to G in this context (since  
1106 both A and G do not result in LOF) plus 0.6 times the rate at which T mutates to A in this con-  
1107 text plus the rate at which T mutates to G in this context. Implicitly this scheme assumes that the  
1108 flanking nucleotides in the trinucleotide context do not change, and we further assume that all  
1109 mutations resulting in CpGs result in unmethylated CpGs.

1110 For the population sizes in each generation, we used the “CEU” model inferred in [75] using  
1111 the 1000 Genomes Project data [94]. This model was also used in [4]. Population sizes under this  
1112 model are relatively constant before 5156 generations ago (approximately 155 thousand years ago)  
1113 and the effects of strong selection are relatively insensitive to all but the most recent population  
1114 sizes, so for a computational speedup we assumed that the population size was constant prior  
1115 to 5156 generations ago. Recently, [4] found that this CEU model underestimates the number  
1116 of low frequency variants and that changing the population size to 5,000,000 for the most recent  
1117 50 generations provides a better fit to the data. We used both demographic models and found  
1118 qualitatively similar results, with slightly better fit provided by the modified model, so we used  
1119 that demographic model for all subsequent analyses. In both cases, we modified the most ancient  
1120 population sizes, which are relatively constant, to be actually constant to speed up likelihood  
1121 calculations. The demographic models are presented in Supplementary Figure 1.

1122 The only remaining model parameter is  $p_{\text{miss}}$  the probability that any given LOF is misan-  
1123 notated. Throughout we focus on LOFs that either introduce early stop codons, disrupt splice  
1124 donors, or disrupts splice acceptors. Given that predicting which variants have these different  
1125 consequences involves different bioinformatic challenges, we inferred separate misannotation  
1126 probabilities  $p_{\text{miss}}^c$  for  $c \in \{\text{stop codon, splice donor, splice acceptor}\}$ . Below we write  $p_{\text{miss}}$  for the  
1127 collection of these three misannotation parameters. To get a rough estimate of these parameters  
1128 and avoid excessive computational burden, we took an h-likelihood approach [95,96]. That is, we  
1129 jointly maximized the likelihood across all genes with respect to their selective constraints as well



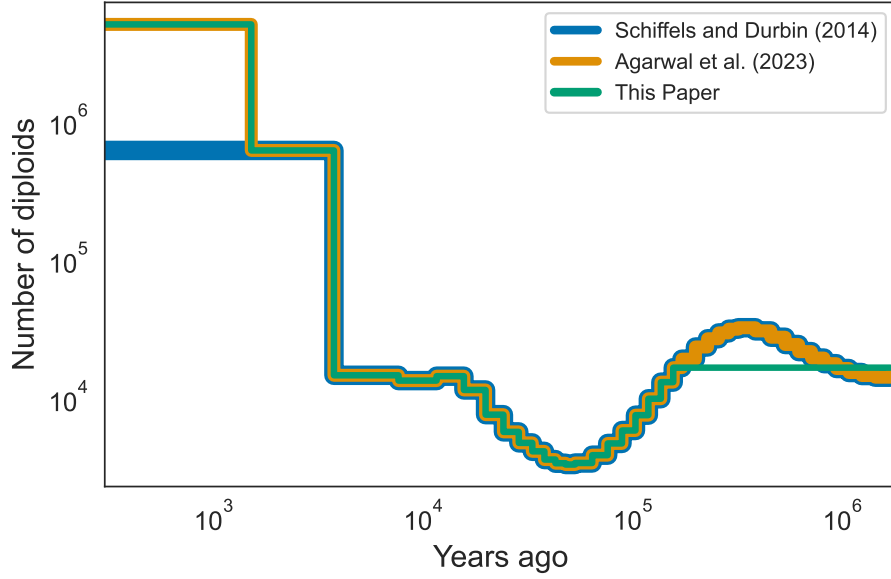

Supplementary Figure 1: CEU Demography inferred by Schiffels and Durbin [75], modified by Agarwal and colleagues [4], and further modified for this paper.

1130 as the the three misannotation probabilities that are shared across all genes:

$$\max_{p_{\text{miss}}, s_{\text{het}}^{(1)}, \dots, s_{\text{het}}^{(M)}} \sum_{i=1}^M \log p \left( \mathbf{y}^{(i)} \mid s_{\text{het}}^{(i)}, p_{\text{miss}} \right).$$

1131 This approach of just using the maximum likelihood estimates of  $s_{\text{het}}$  for each gene contrasts with  
 1132 the standard empirical Bayes approach, which would involve marginalizing out the unknown  $s_{\text{het}}$   
 1133 values. Yet, this marginalization step depends on the prior on  $s_{\text{het}}$ , which we learn via our NGBost  
 1134 framework. As a result, we would need to repeatedly run our NGBost framework as an inner loop  
 1135 to perform the standard empirical Bayes approach on  $p_{\text{miss}}$ . For our application, these values are  
 1136 nuisance parameters, and the results are relatively insensitive to their exact values so we opted for  
 1137 this simpler h-likelihood approach. Ultimately, we estimate that the probability of misannotation  
 1138 is 0.7%, 6.1%, and 8.4% for stop codons, splice donors, and splice acceptors respectively.

## 1139 C Feature processing and selection

1140 We compiled 10 types of gene features from several sources:

- 1141 1. *Gene structure*. Gene structure features were derived from GENCODE gene annotations (Re-  
1142 lease 39) [78]. Such features include the number of transcripts and, for the primary transcript  
1143 of each gene (the transcript tagged `Ensembl_canonical`), the number of exons as well as the  
1144 length and GC content of the transcript, total coding region, 5' UTR, and 3' UTR.
- 1145 2. *Gene expression*. We used gene features from 77 bulk and single-cell RNA-seq datasets, pro-  
1146 cessed and derived in [97]. These datasets can be grouped into 24 categories representing  
1147 tissues, cell types, and developmental stage (Table 6). For each dataset, features were de-  
1148 rived separately from all data and from individual cell clusters (for example, gene loadings  
1149 on principal components). In addition, features were derived from comparisons between  
1150 clusters (for example, t-statistics for differential expression). Finally, we include a metric,  $\tau$ ,  
1151 that summarizes the tissue-specificity of gene expression [98].
- 1152 3. *Biological pathways and Gene Ontology terms*. First, we included previously curated biological  
1153 pathway features [97,99]. In addition, to include GO terms that capture additional known  
1154 relationships between genes, we downloaded Biological Pathway (BP), Molecular Function  
1155 (MF), and Cellular Component (CC) terms [100] with at least 10 member genes using the  
1156 procedure described in [10]. Features for each gene were encoded as binary indicators of the  
1157 gene's membership in the pathways and GO terms.
- 1158 4. *Connectedness in protein-protein interaction (PPI) networks*. We included previously computed  
1159 measures of the connectedness of protein products of genes in PPI networks [10]. Connect-  
1160 edness was calculated as the number of interactions per protein weighted by the interaction  
1161 confidence scores.
- 1162 5. *Co-expression*. First, we included previously computed measures of the connectedness of  
1163 genes in co-expression networks [10], where connectedness measures the relative number  
1164 of neighbors of each gene in the network, averaged over tissues. Next, for each gene, we  
1165 derived features representing its co-expression with other genes (i.e. correlation in their ex-  
1166 pression levels across samples). To do this, we downloaded from the GeneFriends database  
1167 a co-expression network derived from GTEx RNA-seq samples [101,102], calculated the vari-  
1168 ance in the co-expression for each gene, and kept the 6,000 most variable genes. Then, we  
1169 included the co-expression with each of these 6,000 genes as a feature.
- 1170 6. *Gene regulatory landscape*. Gene regulatory features include the counts and properties of the  
1171 enhancers and promoters that regulate each gene. First, we included the number of pro-  
1172 moters per gene estimated by the FANTOM consortium using Cap Analysis of Gene Ex-  
1173 pression [10, 103]. Next, for each gene, we calculated the number, summed length, and  
1174 summed score of enhancer-to-gene links predicted using the Activity-By-Contact (ABC) ap-  
1175 proach [49,104], where an enhancer is considered linked to a gene if its ABC score is  $\geq 0.015$ .  
1176 We computed separate features for each of 131 biosamples. We also included features de-  
1177 rived by aggregating over all biosamples for both ABC enhancers and predicted enhancers

1178 from the Roadmap Epigenomics Consortium [10, 105, 106]—these feature include the num-  
1179 ber of biosamples with an active enhancer element, the total number of enhancer elements,  
1180 the total number of enhancer elements after taking merging enhancer domains, the total  
1181 length of the merged domains, and the average total enhancer length in an active cell type.  
1182 Finally, we included the enhancer-domain score for each gene [9] as a feature.

1183 7. *Conservation across species.* For each gene, we calculated the mean and 95th percentile phast-  
1184 Cons scores over the gene’s exons for multiple alignments of 7, 17, 20, 30, and 100 verte-  
1185 brate species to the human genome [107]. We downloaded phastCons Scores from [https://](https://hgdownload.soe.ucsc.edu/goldenPath/hg38/)  
1186 [hgdownload.soe.ucsc.edu/goldenPath/hg38/](https://hgdownload.soe.ucsc.edu/goldenPath/hg38/). In addition, we included the fraction of  
1187 coding sequence (CDS) or exons constrained across 240 mammals or 43 primates sequenced  
1188 in the Zoonomia project [108], with constraint determined by the per-base phyloP [109] or  
1189 phastCons score. Zoonomia data were downloaded from [https://figshare.com/articles/](https://figshare.com/articles/dataset/geneMatrix/13335548)  
1190 [dataset/geneMatrix/13335548](https://figshare.com/articles/dataset/geneMatrix/13335548).

1191 8. *Protein embedding features.* We included as features the embeddings learned by an autoen-  
1192 coder (ProtT5) trained on protein sequences [110]. Embeddings were downloaded from  
1193 <https://zenodo.org/record/5047020>. The embedding for each protein is a fixed-size vec-  
1194 tor that captures some of the protein’s biophysical and functional properties. For each gene  
1195 with more than one protein product, we averaged the embeddings of the proteins for that  
1196 gene.

1197 9. *Subcellular localization.* We included as features the subcellular localization of each pro-  
1198 tein and whether the protein is membrane-bound or soluble, as predicted by deep neu-  
1199 ral networks trained on the ProtT5 protein embeddings [110, 111]. Possible subcellular  
1200 classes included nucleus, cytoplasm, extracellular space, mitochondrion, cell membrane,  
1201 endoplasmatic reticulum, plastid, Golgi apparatus, lysosome or vacuole, and peroxisome.  
1202 Predictions were one-hot encoded, and for each gene with more than one protein product,  
1203 we summed the predictions for the gene’s proteins. Predictions were downloaded from  
1204 <https://zenodo.org/record/5047020>.

1205 10. *Missense constraint.* We included a measure of each gene’s average intolerance to missense  
1206 variants (UNEECON-G score) [112]. UNEECON-G scores incorporate variant-level features  
1207 to account for differences in the effects of missense variants on gene function.

1208 In addition to these 10 groups of features, we included a binary indicator for whether the  
1209 gene is located on the X chromosome. Genes in the pseudoautosomal regions were categorized as  
1210 autosomal.

1211 After compiling these features (total of 65,383), we performed feature selection to minimize  
1212 the practical complexity of training on such a large feature set and the complexity of the resulting  
1213 model. First, we removed features with zero variance and features where the Spearman corre-  
1214 lation of the feature values with  $O/E$  (the ratio of observed over expected unique LOF variants,  
1215 computed using gnomAD data) was less than 0.1 or had a nominal p-value  $\geq 0.05$ . Next, we per-  
1216 formed simultaneous feature selection and an initial round of hyperparameter tuning using the  
1217 shap-hypetune package, which uses Bayesian optimization to identify a set of features and hyper-  
1218 parameters that minimize the loss of a machine learning model fit on the training data. Specifically,  
1219 we fit gradient-boosted trees using XGBoost to predict  $O/E$  from the gene features; we chose to

1220 perform feature selection using XGBoost rather than NGBoost as training XGBoost models is sub-  
1221 stantially faster, and because we expect features/hyperparameters that perform well for XGBoost  
1222 to also perform well for NGBoost. For each set of hyperparameters, shap-hypetune performs back-  
1223 ward step-wise selection by removing the  $k$  least influential features (we chose  $k = 1000$  and  
1224 calculated influence using SHAP scores) at each step. Finally, we performed further feature se-  
1225 lection using shap-hypetune by fixing the hyperparameters and performing backward step-wise  
1226 selection with  $k = 50$ . Ultimately, we included 1,248 features in the model.

## 1227 D Estimating additional gene properties using GeneBayes

1228 GeneBayes is a flexible framework that can be used to infer other gene-level properties of interest  
1229 beyond  $s_{\text{het}}$ . In Figure 6, we presented a schematic of the key components of GeneBayes that users  
1230 should specify, which we describe in more detail now.

1231 First, users should specify the gene features to use as predictors. We expect the gene features  
1232 we use for  $s_{\text{het}}$  estimation to work well for other applications, but GeneBayes supports any choice  
1233 of features. In particular, GeneBayes can handle categorical and continuous features without fea-  
1234 ture scaling, as well as features with missing values.

1235 Next, users should specify the form of the prior distribution. GeneBayes supports the distri-  
1236 butions defined by the `distributions` package of PyTorch. GeneBayes also supports custom dis-  
1237 tributions, as long as they implement the methods used by GeneBayes (i.e. `log_prob` and `sample`)  
1238 and are differentiable within the PyTorch framework.

1239 Finally, users need to specify a likelihood function that relates their gene property of interest to  
1240 observed data. The likelihood can be specified in terms of a PyTorch distribution, or as a custom  
1241 function.

1242 After model training, GeneBayes outputs a per-gene posterior mean and 95% credible interval  
1243 for the property of interest. For each parameter in the prior, GeneBayes also outputs a metric for  
1244 each feature that represents the contribution of the feature to predictions of the parameter.

1245 In the next section, we describe in more detail the two example applications that we outlined  
1246 in Figure 6.

### 1247 Example applications

#### 1248 Differential expression

1249 In this example, users have estimates of log-fold changes in gene expression between conditions  
1250 and their standard errors from a differential expression workflow, and would like to estimate log-  
1251 fold changes with greater power (e.g. for lowly-expressed genes with noisy estimates).

1252 **Likelihood** We define  $\ell_{\text{DE}}^{(i)}$  and  $\ell_i$  as the estimated and true log-fold change in expression respec-  
1253 tively for gene  $i$ , and  $s_i$  as the standard error for the estimate. Then, we define the likelihood for  $\ell_i$   
1254 as

$$\ell_{\text{DE}}^{(i)} | \ell_i \sim \text{Normal}(\ell_i, s_i^2).$$

1255 **Prior** We describe two potential priors that one may choose to try. The first is a normal prior  
1256 with parameters  $\mu_i$  and  $\sigma_i$ :

$$\ell_i \sim \text{Normal}(\mu_i, \sigma_i^2).$$

1257 The second is a spike-and-slab prior with parameters  $\pi_i$ ,  $\mu_i$ , and  $\sigma_i$ , which assumes that gene  $i$

1258 only has a  $\pi_i$  probability of being differentially expressed:

$$z_i \sim \text{Bernoulli}(\pi_i)$$
$$\ell_i | z_i \sim \begin{cases} 0, & \text{if } z_i = 0 \\ \text{Normal}(\mu_i, \sigma_i^2), & \text{if } z_i = 1 \end{cases}$$

### 1259 **Variant burden tests**

1260 In this example, users have sequencing data from patients with a disease or (if calling *de novo*  
1261 mutations) sequencing data from family trios, and would like to identify genes with excess muta-  
1262 tional burden in patients (e.g. an excess of missense or LOF variants). One approach is to infer the  
1263 relative risk for each gene (denoted as  $\gamma_i$  for gene  $i$ ), defined as the expected ratio of the number  
1264 of variants in patients to the number of variants in healthy individuals.

1265 **Likelihood** Let  $E_i$  be the number of variants we expect to observe for gene  $i$  given the study  
1266 sample size and sequence-dependent mutation rates (e.g. expected counts obtained using the  
1267 mutational model developed by [84]). Next, let  $O_i$  be the number of variants observed in patients  
1268 for gene  $i$ . Then, we define the likelihood for  $\eta_i$  as

$$O_i | \eta_i \sim \text{Poisson}(\eta_i E_i).$$

1269 **Prior** Because  $\eta_i$  is non-negative, one may want to choose a gamma prior with parameters  $\alpha_i$   
1270 and  $\beta_i$ :

$$\eta_i \sim \text{Gamma}(\alpha_i, \beta_i).$$

| Gene          | $s_{\text{het}}$ | LOEUF |
|---------------|------------------|-------|
| <i>RPL11</i>  | 0.75             | 0.3   |
| <i>RPL18</i>  | 0.72             | 0.28  |
| <i>RPL5</i>   | 0.71             | 0.17  |
| <i>RPL35A</i> | 0.67             | 0.41  |
| <i>RPL15</i>  | 0.61             | 0.27  |
| <i>RPL26</i>  | 0.61             | 0.38  |
| <i>RPS15A</i> | 0.61             | 0.56  |
| <i>RPS7</i>   | 0.60             | 0.31  |
| <i>RPS10</i>  | 0.60             | 0.27  |
| <i>RPS26</i>  | 0.58             | 0.48  |
| <i>RPL27</i>  | 0.56             | 0.48  |
| <i>RPS24</i>  | 0.48             | 0.59  |
| <i>RPS29</i>  | 0.40             | 1.2   |
| <i>RPS27</i>  | 0.31             | 0.64  |
| <i>RPS28</i>  | 0.26             | 0.8   |
| <i>RPL35</i>  | 0.25             | 0.72  |

Supplementary Table 1: LOEUF and  $s_{\text{het}}$  for ribosomal proteins associated with Diamond-Blackfan anemia

**A** Classifying genes nonessential for survival *in vitro*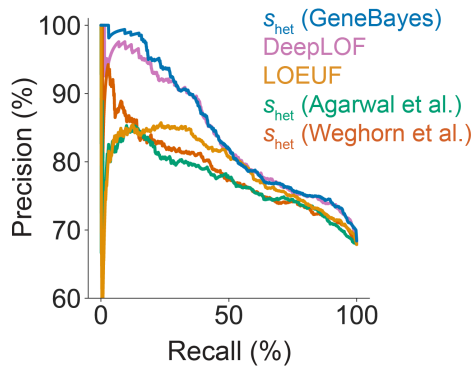**B** Classifying developmental disorder genes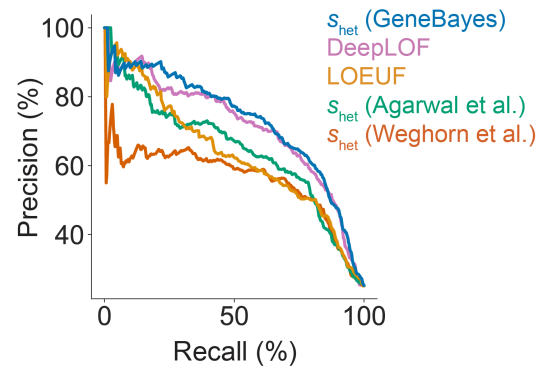**C** Enrichment of *de novo* developmental disorder mutations in constrained genes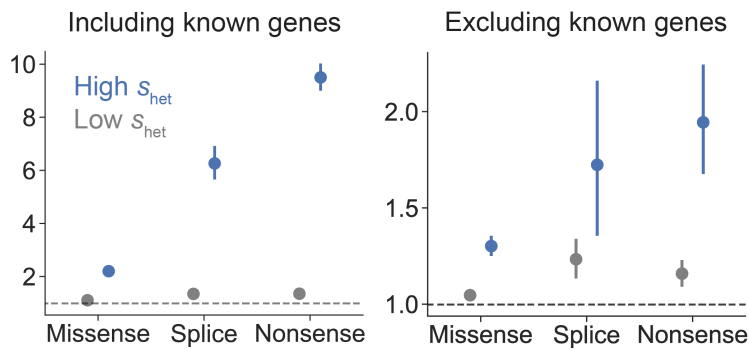

Supplementary Figure 2: **Additional validation analyses.** **A)** Precision-recall curves comparing the performance of  $s_{het}$  estimates from GeneBayes against other constraint metrics in classifying non-essential genes. **B)** Precision-recall curves comparing the performance of  $s_{het}$  against other constraint metrics in classifying developmental disorder genes. **C)** Enrichment of *de novo* mutations in patients with developmental disorders, calculated as the observed number of mutations over the expected number under a null mutational model. We plot the enrichment of missense, splice, and nonsense variants in the 10% of genes considered most constrained by  $s_{het}$  (blue) and in all other genes (gray), including (left) and excluding (right) known developmental disorder genes. Bars represent 95% confidence intervals.



## Supplementary Files

This is a list of supplementary files associated with this preprint. Click to download.

- [SupplementaryTable2.txt](#)
- [SupplementaryTable3.tsv.zip](#)
- [SupplementaryTable4.xlsx](#)
