# Supplementary material for: Bayesian estimation of gene constraint from an evolutionary model with gene features
Source: Research Square preprint supplement (doi:10.21203/rs.3.rs-3012879/v1), 2023-06-13
Supplement: Supplementary file 1 [file 825e90a9dd698cf0583a2b0e.xlsx]

## Sheet: gene_info
Column name	Description
ensg	Ensembl gene ID
hgnc	HGNC gene ID
chrom	Chromosome

## Sheet: gene_structure_features
Column name	Description
CDS_GC	GC content of CDS
3UTR_length	3' UTR length
3UTR_GC	GC content of 3' UTR
transcript_length	Transcript length
num_exons	Number of exons
transcript_GC	GC content of transcript
5UTR_length	5' UTR length
5UTR_GC	GC content of 5' UTR
CDS_length	CDS length
Transcript_count	Number of transcripts

## Sheet: gene_expression_features
Column name	Description
tau	Tissue specificity of gene expression (0, broadly expressed to 1, tissue specific)
GTEx.1	Gene expression feature, curated for PoPS
GTEx.2	Gene expression feature, curated for PoPS
GTEx.3	Gene expression feature, curated for PoPS
GTEx.4	Gene expression feature, curated for PoPS
GTEx.5	Gene expression feature, curated for PoPS
GTEx.6	Gene expression feature, curated for PoPS
GTEx.7	Gene expression feature, curated for PoPS
GTEx.8	Gene expression feature, curated for PoPS
GTEx.9	Gene expression feature, curated for PoPS
GTEx.10	Gene expression feature, curated for PoPS
GTEx.11	Gene expression feature, curated for PoPS
GTEx.12	Gene expression feature, curated for PoPS
GTEx.13	Gene expression feature, curated for PoPS
GTEx.14	Gene expression feature, curated for PoPS
GTEx.15	Gene expression feature, curated for PoPS
GTEx.16	Gene expression feature, curated for PoPS
GTEx.17	Gene expression feature, curated for PoPS
GTEx.18	Gene expression feature, curated for PoPS
GTEx.19	Gene expression feature, curated for PoPS
GTEx.20	Gene expression feature, curated for PoPS
GTEx.21	Gene expression feature, curated for PoPS
GTEx.22	Gene expression feature, curated for PoPS
GTEx.23	Gene expression feature, curated for PoPS
GTEx.24	Gene expression feature, curated for PoPS
GTEx.25	Gene expression feature, curated for PoPS
GTEx.26	Gene expression feature, curated for PoPS
GTEx.27	Gene expression feature, curated for PoPS
GTEx.28	Gene expression feature, curated for PoPS
GTEx.29	Gene expression feature, curated for PoPS
GTEx.30	Gene expression feature, curated for PoPS
GTEx.31	Gene expression feature, curated for PoPS
GTEx.32	Gene expression feature, curated for PoPS
GTEx.33	Gene expression feature, curated for PoPS
GTEx.34	Gene expression feature, curated for PoPS
GTEx.35	Gene expression feature, curated for PoPS
GTEx.36	Gene expression feature, curated for PoPS
GTEx.37	Gene expression feature, curated for PoPS
GTEx.38	Gene expression feature, curated for PoPS
GTEx.39	Gene expression feature, curated for PoPS
GTEx.40	Gene expression feature, curated for PoPS
GTEx.41	Gene expression feature, curated for PoPS
GTEx.42	Gene expression feature, curated for PoPS
GTEx.43	Gene expression feature, curated for PoPS
GTEx.44	Gene expression feature, curated for PoPS
GTEx.45	Gene expression feature, curated for PoPS
GTEx.46	Gene expression feature, curated for PoPS
GTEx.47	Gene expression feature, curated for PoPS
GTEx.48	Gene expression feature, curated for PoPS
GTEx.49	Gene expression feature, curated for PoPS
GTEx.50	Gene expression feature, curated for PoPS
GTEx.51	Gene expression feature, curated for PoPS
GTEx.52	Gene expression feature, curated for PoPS
GTEx.53	Gene expression feature, curated for PoPS
GTEx_brain.1	Gene expression feature, curated for PoPS
GTEx_brain.2	Gene expression feature, curated for PoPS
GTEx_brain.3	Gene expression feature, curated for PoPS
GTEx_brain.4	Gene expression feature, curated for PoPS
GTEx_brain.5	Gene expression feature, curated for PoPS
GTEx_brain.6	Gene expression feature, curated for PoPS
GTEx_brain.7	Gene expression feature, curated for PoPS
GTEx_brain.8	Gene expression feature, curated for PoPS
GTEx_brain.9	Gene expression feature, curated for PoPS
GTEx_brain.10	Gene expression feature, curated for PoPS
GTEx_brain.11	Gene expression feature, curated for PoPS
GTEx_brain.12	Gene expression feature, curated for PoPS
GTEx_brain.13	Gene expression feature, curated for PoPS
Franke.1	Gene expression feature, curated for PoPS
Franke.2	Gene expression feature, curated for PoPS
Franke.3	Gene expression feature, curated for PoPS
Franke.4	Gene expression feature, curated for PoPS
Franke.5	Gene expression feature, curated for PoPS
Franke.6	Gene expression feature, curated for PoPS
Franke.7	Gene expression feature, curated for PoPS
Franke.8	Gene expression feature, curated for PoPS
Franke.9	Gene expression feature, curated for PoPS
Franke.10	Gene expression feature, curated for PoPS
Franke.11	Gene expression feature, curated for PoPS
Franke.12	Gene expression feature, curated for PoPS
Franke.13	Gene expression feature, curated for PoPS
Franke.14	Gene expression feature, curated for PoPS
Franke.15	Gene expression feature, curated for PoPS
Franke.16	Gene expression feature, curated for PoPS
Franke.17	Gene expression feature, curated for PoPS
Franke.18	Gene expression feature, curated for PoPS
Franke.19	Gene expression feature, curated for PoPS
Franke.20	Gene expression feature, curated for PoPS
Franke.21	Gene expression feature, curated for PoPS
Franke.22	Gene expression feature, curated for PoPS
Franke.23	Gene expression feature, curated for PoPS
Franke.24	Gene expression feature, curated for PoPS
Franke.25	Gene expression feature, curated for PoPS
Franke.26	Gene expression feature, curated for PoPS
Franke.27	Gene expression feature, curated for PoPS
Franke.28	Gene expression feature, curated for PoPS
Franke.29	Gene expression feature, curated for PoPS
Franke.30	Gene expression feature, curated for PoPS
Franke.31	Gene expression feature, curated for PoPS
Franke.32	Gene expression feature, curated for PoPS
Franke.33	Gene expression feature, curated for PoPS
Franke.34	Gene expression feature, curated for PoPS
Franke.35	Gene expression feature, curated for PoPS
Franke.36	Gene expression feature, curated for PoPS
Franke.37	Gene expression feature, curated for PoPS
Franke.38	Gene expression feature, curated for PoPS
Franke.39	Gene expression feature, curated for PoPS
Franke.40	Gene expression feature, curated for PoPS
Franke.41	Gene expression feature, curated for PoPS
Franke.42	Gene expression feature, curated for PoPS
Franke.43	Gene expression feature, curated for PoPS
Franke.44	Gene expression feature, curated for PoPS
Franke.45	Gene expression feature, curated for PoPS
Franke.46	Gene expression feature, curated for PoPS
Franke.47	Gene expression feature, curated for PoPS
Franke.48	Gene expression feature, curated for PoPS
Franke.49	Gene expression feature, curated for PoPS
Franke.50	Gene expression feature, curated for PoPS
Franke.51	Gene expression feature, curated for PoPS
Franke.52	Gene expression feature, curated for PoPS
Franke.53	Gene expression feature, curated for PoPS
Franke.54	Gene expression feature, curated for PoPS
Franke.55	Gene expression feature, curated for PoPS
Franke.56	Gene expression feature, curated for PoPS
Franke.57	Gene expression feature, curated for PoPS
Franke.58	Gene expression feature, curated for PoPS
Franke.59	Gene expression feature, curated for PoPS
Franke.60	Gene expression feature, curated for PoPS
Franke.61	Gene expression feature, curated for PoPS
Franke.62	Gene expression feature, curated for PoPS
Franke.63	Gene expression feature, curated for PoPS
Franke.64	Gene expression feature, curated for PoPS
Franke.65	Gene expression feature, curated for PoPS
Franke.66	Gene expression feature, curated for PoPS
Franke.67	Gene expression feature, curated for PoPS
Franke.68	Gene expression feature, curated for PoPS
Franke.69	Gene expression feature, curated for PoPS
Franke.70	Gene expression feature, curated for PoPS
Franke.71	Gene expression feature, curated for PoPS
Franke.72	Gene expression feature, curated for PoPS
Franke.73	Gene expression feature, curated for PoPS
Franke.74	Gene expression feature, curated for PoPS
Franke.75	Gene expression feature, curated for PoPS
Franke.76	Gene expression feature, curated for PoPS
Franke.77	Gene expression feature, curated for PoPS
Franke.78	Gene expression feature, curated for PoPS
Franke.79	Gene expression feature, curated for PoPS
Franke.80	Gene expression feature, curated for PoPS
Franke.81	Gene expression feature, curated for PoPS
Franke.82	Gene expression feature, curated for PoPS
Franke.83	Gene expression feature, curated for PoPS
Franke.84	Gene expression feature, curated for PoPS
Franke.85	Gene expression feature, curated for PoPS
Franke.86	Gene expression feature, curated for PoPS
Franke.87	Gene expression feature, curated for PoPS
Franke.88	Gene expression feature, curated for PoPS
Franke.89	Gene expression feature, curated for PoPS
Franke.90	Gene expression feature, curated for PoPS
Franke.91	Gene expression feature, curated for PoPS
Franke.92	Gene expression feature, curated for PoPS
Franke.93	Gene expression feature, curated for PoPS
Franke.94	Gene expression feature, curated for PoPS
Franke.95	Gene expression feature, curated for PoPS
Franke.96	Gene expression feature, curated for PoPS
Franke.97	Gene expression feature, curated for PoPS
Franke.98	Gene expression feature, curated for PoPS
Franke.99	Gene expression feature, curated for PoPS
Franke.100	Gene expression feature, curated for PoPS
Franke.101	Gene expression feature, curated for PoPS
Franke.102	Gene expression feature, curated for PoPS
Franke.103	Gene expression feature, curated for PoPS
Franke.104	Gene expression feature, curated for PoPS
Franke.105	Gene expression feature, curated for PoPS
Franke.106	Gene expression feature, curated for PoPS
Franke.107	Gene expression feature, curated for PoPS
Franke.108	Gene expression feature, curated for PoPS
Franke.109	Gene expression feature, curated for PoPS
Franke.110	Gene expression feature, curated for PoPS
Franke.111	Gene expression feature, curated for PoPS
Franke.112	Gene expression feature, curated for PoPS
Franke.113	Gene expression feature, curated for PoPS
Franke.114	Gene expression feature, curated for PoPS
Franke.115	Gene expression feature, curated for PoPS
Franke.116	Gene expression feature, curated for PoPS
Franke.117	Gene expression feature, curated for PoPS
Franke.118	Gene expression feature, curated for PoPS
Franke.119	Gene expression feature, curated for PoPS
Franke.120	Gene expression feature, curated for PoPS
Franke.121	Gene expression feature, curated for PoPS
Franke.122	Gene expression feature, curated for PoPS
Franke.123	Gene expression feature, curated for PoPS
Franke.124	Gene expression feature, curated for PoPS
Franke.125	Gene expression feature, curated for PoPS
Franke.126	Gene expression feature, curated for PoPS
Franke.127	Gene expression feature, curated for PoPS
Franke.128	Gene expression feature, curated for PoPS
Franke.129	Gene expression feature, curated for PoPS
Franke.130	Gene expression feature, curated for PoPS
Franke.131	Gene expression feature, curated for PoPS
Franke.132	Gene expression feature, curated for PoPS
Franke.133	Gene expression feature, curated for PoPS
Franke.134	Gene expression feature, curated for PoPS
Franke.135	Gene expression feature, curated for PoPS
Franke.136	Gene expression feature, curated for PoPS
Franke.137	Gene expression feature, curated for PoPS
Franke.138	Gene expression feature, curated for PoPS
Franke.139	Gene expression feature, curated for PoPS
Franke.140	Gene expression feature, curated for PoPS
Franke.141	Gene expression feature, curated for PoPS
Franke.142	Gene expression feature, curated for PoPS
Franke.143	Gene expression feature, curated for PoPS
Franke.144	Gene expression feature, curated for PoPS
Franke.145	Gene expression feature, curated for PoPS
Franke.146	Gene expression feature, curated for PoPS
Franke.147	Gene expression feature, curated for PoPS
Franke.148	Gene expression feature, curated for PoPS
Franke.149	Gene expression feature, curated for PoPS
Franke.150	Gene expression feature, curated for PoPS
Franke.151	Gene expression feature, curated for PoPS
Franke.152	Gene expression feature, curated for PoPS
ImmGen.1	Gene expression feature, curated for PoPS
ImmGen.2	Gene expression feature, curated for PoPS
ImmGen.3	Gene expression feature, curated for PoPS
ImmGen.4	Gene expression feature, curated for PoPS
ImmGen.5	Gene expression feature, curated for PoPS
ImmGen.6	Gene expression feature, curated for PoPS
ImmGen.7	Gene expression feature, curated for PoPS
ImmGen.8	Gene expression feature, curated for PoPS
ImmGen.9	Gene expression feature, curated for PoPS
ImmGen.10	Gene expression feature, curated for PoPS
ImmGen.11	Gene expression feature, curated for PoPS
ImmGen.12	Gene expression feature, curated for PoPS
ImmGen.13	Gene expression feature, curated for PoPS
ImmGen.14	Gene expression feature, curated for PoPS
ImmGen.15	Gene expression feature, curated for PoPS
ImmGen.16	Gene expression feature, curated for PoPS
ImmGen.17	Gene expression feature, curated for PoPS
ImmGen.18	Gene expression feature, curated for PoPS
ImmGen.19	Gene expression feature, curated for PoPS
ImmGen.20	Gene expression feature, curated for PoPS
ImmGen.21	Gene expression feature, curated for PoPS
ImmGen.22	Gene expression feature, curated for PoPS
ImmGen.23	Gene expression feature, curated for PoPS
ImmGen.24	Gene expression feature, curated for PoPS
ImmGen.25	Gene expression feature, curated for PoPS
ImmGen.26	Gene expression feature, curated for PoPS
ImmGen.27	Gene expression feature, curated for PoPS
ImmGen.28	Gene expression feature, curated for PoPS
ImmGen.29	Gene expression feature, curated for PoPS
ImmGen.30	Gene expression feature, curated for PoPS
ImmGen.31	Gene expression feature, curated for PoPS
ImmGen.32	Gene expression feature, curated for PoPS
ImmGen.33	Gene expression feature, curated for PoPS
ImmGen.34	Gene expression feature, curated for PoPS
ImmGen.35	Gene expression feature, curated for PoPS
ImmGen.36	Gene expression feature, curated for PoPS
ImmGen.37	Gene expression feature, curated for PoPS
ImmGen.38	Gene expression feature, curated for PoPS
ImmGen.39	Gene expression feature, curated for PoPS
ImmGen.40	Gene expression feature, curated for PoPS
ImmGen.41	Gene expression feature, curated for PoPS
ImmGen.42	Gene expression feature, curated for PoPS
ImmGen.43	Gene expression feature, curated for PoPS
ImmGen.44	Gene expression feature, curated for PoPS
ImmGen.45	Gene expression feature, curated for PoPS
ImmGen.46	Gene expression feature, curated for PoPS
ImmGen.47	Gene expression feature, curated for PoPS
ImmGen.48	Gene expression feature, curated for PoPS
ImmGen.49	Gene expression feature, curated for PoPS
ImmGen.50	Gene expression feature, curated for PoPS
ImmGen.51	Gene expression feature, curated for PoPS
ImmGen.52	Gene expression feature, curated for PoPS
ImmGen.53	Gene expression feature, curated for PoPS
ImmGen.54	Gene expression feature, curated for PoPS
ImmGen.55	Gene expression feature, curated for PoPS
ImmGen.56	Gene expression feature, curated for PoPS
ImmGen.57	Gene expression feature, curated for PoPS
ImmGen.58	Gene expression feature, curated for PoPS
ImmGen.59	Gene expression feature, curated for PoPS
ImmGen.60	Gene expression feature, curated for PoPS
ImmGen.61	Gene expression feature, curated for PoPS
ImmGen.62	Gene expression feature, curated for PoPS
ImmGen.63	Gene expression feature, curated for PoPS
ImmGen.64	Gene expression feature, curated for PoPS
ImmGen.65	Gene expression feature, curated for PoPS
ImmGen.66	Gene expression feature, curated for PoPS
ImmGen.67	Gene expression feature, curated for PoPS
ImmGen.68	Gene expression feature, curated for PoPS
ImmGen.69	Gene expression feature, curated for PoPS
ImmGen.70	Gene expression feature, curated for PoPS
ImmGen.71	Gene expression feature, curated for PoPS
ImmGen.72	Gene expression feature, curated for PoPS
ImmGen.73	Gene expression feature, curated for PoPS
ImmGen.74	Gene expression feature, curated for PoPS
ImmGen.75	Gene expression feature, curated for PoPS
ImmGen.76	Gene expression feature, curated for PoPS
ImmGen.77	Gene expression feature, curated for PoPS
ImmGen.78	Gene expression feature, curated for PoPS
ImmGen.79	Gene expression feature, curated for PoPS
ImmGen.80	Gene expression feature, curated for PoPS
ImmGen.81	Gene expression feature, curated for PoPS
ImmGen.82	Gene expression feature, curated for PoPS
ImmGen.83	Gene expression feature, curated for PoPS
ImmGen.84	Gene expression feature, curated for PoPS
ImmGen.85	Gene expression feature, curated for PoPS
ImmGen.86	Gene expression feature, curated for PoPS
ImmGen.87	Gene expression feature, curated for PoPS
ImmGen.88	Gene expression feature, curated for PoPS
ImmGen.89	Gene expression feature, curated for PoPS
ImmGen.90	Gene expression feature, curated for PoPS
ImmGen.91	Gene expression feature, curated for PoPS
ImmGen.92	Gene expression feature, curated for PoPS
ImmGen.93	Gene expression feature, curated for PoPS
ImmGen.94	Gene expression feature, curated for PoPS
ImmGen.95	Gene expression feature, curated for PoPS
ImmGen.96	Gene expression feature, curated for PoPS
ImmGen.97	Gene expression feature, curated for PoPS
ImmGen.98	Gene expression feature, curated for PoPS
ImmGen.99	Gene expression feature, curated for PoPS
ImmGen.100	Gene expression feature, curated for PoPS
ImmGen.101	Gene expression feature, curated for PoPS
ImmGen.102	Gene expression feature, curated for PoPS
ImmGen.103	Gene expression feature, curated for PoPS
ImmGen.104	Gene expression feature, curated for PoPS
ImmGen.105	Gene expression feature, curated for PoPS
ImmGen.106	Gene expression feature, curated for PoPS
ImmGen.107	Gene expression feature, curated for PoPS
ImmGen.108	Gene expression feature, curated for PoPS
ImmGen.109	Gene expression feature, curated for PoPS
ImmGen.110	Gene expression feature, curated for PoPS
ImmGen.111	Gene expression feature, curated for PoPS
ImmGen.112	Gene expression feature, curated for PoPS
ImmGen.113	Gene expression feature, curated for PoPS
ImmGen.114	Gene expression feature, curated for PoPS
ImmGen.115	Gene expression feature, curated for PoPS
ImmGen.116	Gene expression feature, curated for PoPS
ImmGen.117	Gene expression feature, curated for PoPS
ImmGen.118	Gene expression feature, curated for PoPS
ImmGen.119	Gene expression feature, curated for PoPS
ImmGen.120	Gene expression feature, curated for PoPS
ImmGen.121	Gene expression feature, curated for PoPS
ImmGen.122	Gene expression feature, curated for PoPS
ImmGen.123	Gene expression feature, curated for PoPS
ImmGen.124	Gene expression feature, curated for PoPS
ImmGen.125	Gene expression feature, curated for PoPS
ImmGen.126	Gene expression feature, curated for PoPS
ImmGen.127	Gene expression feature, curated for PoPS
ImmGen.128	Gene expression feature, curated for PoPS
ImmGen.129	Gene expression feature, curated for PoPS
ImmGen.130	Gene expression feature, curated for PoPS
ImmGen.131	Gene expression feature, curated for PoPS
ImmGen.132	Gene expression feature, curated for PoPS
ImmGen.133	Gene expression feature, curated for PoPS
ImmGen.134	Gene expression feature, curated for PoPS
ImmGen.135	Gene expression feature, curated for PoPS
ImmGen.136	Gene expression feature, curated for PoPS
ImmGen.137	Gene expression feature, curated for PoPS
ImmGen.138	Gene expression feature, curated for PoPS
ImmGen.139	Gene expression feature, curated for PoPS
ImmGen.140	Gene expression feature, curated for PoPS
ImmGen.141	Gene expression feature, curated for PoPS
ImmGen.142	Gene expression feature, curated for PoPS
ImmGen.143	Gene expression feature, curated for PoPS
ImmGen.144	Gene expression feature, curated for PoPS
ImmGen.145	Gene expression feature, curated for PoPS
ImmGen.146	Gene expression feature, curated for PoPS
ImmGen.147	Gene expression feature, curated for PoPS
ImmGen.148	Gene expression feature, curated for PoPS
ImmGen.149	Gene expression feature, curated for PoPS
ImmGen.150	Gene expression feature, curated for PoPS
ImmGen.151	Gene expression feature, curated for PoPS
ImmGen.152	Gene expression feature, curated for PoPS
ImmGen.153	Gene expression feature, curated for PoPS
ImmGen.154	Gene expression feature, curated for PoPS
ImmGen.155	Gene expression feature, curated for PoPS
ImmGen.156	Gene expression feature, curated for PoPS
ImmGen.157	Gene expression feature, curated for PoPS
ImmGen.158	Gene expression feature, curated for PoPS
ImmGen.159	Gene expression feature, curated for PoPS
ImmGen.160	Gene expression feature, curated for PoPS
ImmGen.161	Gene expression feature, curated for PoPS
ImmGen.162	Gene expression feature, curated for PoPS
ImmGen.163	Gene expression feature, curated for PoPS
ImmGen.164	Gene expression feature, curated for PoPS
ImmGen.165	Gene expression feature, curated for PoPS
ImmGen.166	Gene expression feature, curated for PoPS
ImmGen.167	Gene expression feature, curated for PoPS
ImmGen.168	Gene expression feature, curated for PoPS
ImmGen.169	Gene expression feature, curated for PoPS
ImmGen.170	Gene expression feature, curated for PoPS
ImmGen.171	Gene expression feature, curated for PoPS
ImmGen.172	Gene expression feature, curated for PoPS
ImmGen.173	Gene expression feature, curated for PoPS
ImmGen.174	Gene expression feature, curated for PoPS
ImmGen.175	Gene expression feature, curated for PoPS
ImmGen.176	Gene expression feature, curated for PoPS
ImmGen.177	Gene expression feature, curated for PoPS
ImmGen.178	Gene expression feature, curated for PoPS
ImmGen.179	Gene expression feature, curated for PoPS
ImmGen.180	Gene expression feature, curated for PoPS
ImmGen.181	Gene expression feature, curated for PoPS
ImmGen.182	Gene expression feature, curated for PoPS
ImmGen.183	Gene expression feature, curated for PoPS
ImmGen.184	Gene expression feature, curated for PoPS
ImmGen.185	Gene expression feature, curated for PoPS
ImmGen.186	Gene expression feature, curated for PoPS
ImmGen.187	Gene expression feature, curated for PoPS
ImmGen.188	Gene expression feature, curated for PoPS
ImmGen.189	Gene expression feature, curated for PoPS
ImmGen.190	Gene expression feature, curated for PoPS
ImmGen.191	Gene expression feature, curated for PoPS
ImmGen.192	Gene expression feature, curated for PoPS
ImmGen.193	Gene expression feature, curated for PoPS
ImmGen.194	Gene expression feature, curated for PoPS
ImmGen.195	Gene expression feature, curated for PoPS
ImmGen.196	Gene expression feature, curated for PoPS
ImmGen.197	Gene expression feature, curated for PoPS
ImmGen.198	Gene expression feature, curated for PoPS
ImmGen.199	Gene expression feature, curated for PoPS
ImmGen.200	Gene expression feature, curated for PoPS
ImmGen.201	Gene expression feature, curated for PoPS
ImmGen.202	Gene expression feature, curated for PoPS
ImmGen.203	Gene expression feature, curated for PoPS
ImmGen.204	Gene expression feature, curated for PoPS
ImmGen.205	Gene expression feature, curated for PoPS
ImmGen.206	Gene expression feature, curated for PoPS
ImmGen.207	Gene expression feature, curated for PoPS
ImmGen.208	Gene expression feature, curated for PoPS
ImmGen.209	Gene expression feature, curated for PoPS
ImmGen.210	Gene expression feature, curated for PoPS
ImmGen.211	Gene expression feature, curated for PoPS
ImmGen.212	Gene expression feature, curated for PoPS
ImmGen.213	Gene expression feature, curated for PoPS
ImmGen.214	Gene expression feature, curated for PoPS
ImmGen.215	Gene expression feature, curated for PoPS
ImmGen.216	Gene expression feature, curated for PoPS
ImmGen.217	Gene expression feature, curated for PoPS
ImmGen.218	Gene expression feature, curated for PoPS
ImmGen.219	Gene expression feature, curated for PoPS
ImmGen.220	Gene expression feature, curated for PoPS
ImmGen.221	Gene expression feature, curated for PoPS
ImmGen.222	Gene expression feature, curated for PoPS
ImmGen.223	Gene expression feature, curated for PoPS
ImmGen.224	Gene expression feature, curated for PoPS
ImmGen.225	Gene expression feature, curated for PoPS
ImmGen.226	Gene expression feature, curated for PoPS
ImmGen.227	Gene expression feature, curated for PoPS
ImmGen.228	Gene expression feature, curated for PoPS
ImmGen.229	Gene expression feature, curated for PoPS
ImmGen.230	Gene expression feature, curated for PoPS
ImmGen.231	Gene expression feature, curated for PoPS
ImmGen.232	Gene expression feature, curated for PoPS
ImmGen.233	Gene expression feature, curated for PoPS
ImmGen.234	Gene expression feature, curated for PoPS
ImmGen.235	Gene expression feature, curated for PoPS
ImmGen.236	Gene expression feature, curated for PoPS
ImmGen.237	Gene expression feature, curated for PoPS
ImmGen.238	Gene expression feature, curated for PoPS
ImmGen.239	Gene expression feature, curated for PoPS
ImmGen.240	Gene expression feature, curated for PoPS
ImmGen.241	Gene expression feature, curated for PoPS
ImmGen.242	Gene expression feature, curated for PoPS
ImmGen.243	Gene expression feature, curated for PoPS
ImmGen.244	Gene expression feature, curated for PoPS
ImmGen.245	Gene expression feature, curated for PoPS
ImmGen.246	Gene expression feature, curated for PoPS
ImmGen.247	Gene expression feature, curated for PoPS
ImmGen.248	Gene expression feature, curated for PoPS
ImmGen.249	Gene expression feature, curated for PoPS
ImmGen.250	Gene expression feature, curated for PoPS
ImmGen.251	Gene expression feature, curated for PoPS
ImmGen.252	Gene expression feature, curated for PoPS
ImmGen.253	Gene expression feature, curated for PoPS
ImmGen.254	Gene expression feature, curated for PoPS
ImmGen.255	Gene expression feature, curated for PoPS
ImmGen.256	Gene expression feature, curated for PoPS
ImmGen.257	Gene expression feature, curated for PoPS
ImmGen.258	Gene expression feature, curated for PoPS
ImmGen.259	Gene expression feature, curated for PoPS
ImmGen.260	Gene expression feature, curated for PoPS
ImmGen.261	Gene expression feature, curated for PoPS
ImmGen.262	Gene expression feature, curated for PoPS
ImmGen.263	Gene expression feature, curated for PoPS
ImmGen.264	Gene expression feature, curated for PoPS
ImmGen.265	Gene expression feature, curated for PoPS
ImmGen.266	Gene expression feature, curated for PoPS
ImmGen.267	Gene expression feature, curated for PoPS
ImmGen.268	Gene expression feature, curated for PoPS
ImmGen.269	Gene expression feature, curated for PoPS
ImmGen.270	Gene expression feature, curated for PoPS
ImmGen.271	Gene expression feature, curated for PoPS
ImmGen.272	Gene expression feature, curated for PoPS
ImmGen.273	Gene expression feature, curated for PoPS
ImmGen.274	Gene expression feature, curated for PoPS
ImmGen.275	Gene expression feature, curated for PoPS
ImmGen.276	Gene expression feature, curated for PoPS
ImmGen.277	Gene expression feature, curated for PoPS
ImmGen.278	Gene expression feature, curated for PoPS
ImmGen.279	Gene expression feature, curated for PoPS
ImmGen.280	Gene expression feature, curated for PoPS
ImmGen.281	Gene expression feature, curated for PoPS
ImmGen.282	Gene expression feature, curated for PoPS
ImmGen.283	Gene expression feature, curated for PoPS
ImmGen.284	Gene expression feature, curated for PoPS
ImmGen.285	Gene expression feature, curated for PoPS
ImmGen.286	Gene expression feature, curated for PoPS
ImmGen.287	Gene expression feature, curated for PoPS
ImmGen.288	Gene expression feature, curated for PoPS
ImmGen.289	Gene expression feature, curated for PoPS
ImmGen.290	Gene expression feature, curated for PoPS
ImmGen.291	Gene expression feature, curated for PoPS
ImmGen.292	Gene expression feature, curated for PoPS
human_airway_average_expression.1	Gene expression feature, curated for PoPS
human_airway_average_expression.2	Gene expression feature, curated for PoPS
human_airway_average_expression.3	Gene expression feature, curated for PoPS
human_airway_average_expression.4	Gene expression feature, curated for PoPS
human_airway_average_expression.5	Gene expression feature, curated for PoPS
human_airway_average_expression.6	Gene expression feature, curated for PoPS
human_airway_average_expression.7	Gene expression feature, curated for PoPS
human_airway_average_expression.8	Gene expression feature, curated for PoPS
human_airway_average_expression.9	Gene expression feature, curated for PoPS
human_airway_average_expression.10	Gene expression feature, curated for PoPS
human_airway_average_expression.11	Gene expression feature, curated for PoPS
human_airway_average_expression.12	Gene expression feature, curated for PoPS
human_airway_average_expression.13	Gene expression feature, curated for PoPS
human_airway_average_expression.14	Gene expression feature, curated for PoPS
human_airway_average_expression.15	Gene expression feature, curated for PoPS
human_airway_average_expression.16	Gene expression feature, curated for PoPS
human_airway_average_expression.17	Gene expression feature, curated for PoPS
human_airway_average_expression.18	Gene expression feature, curated for PoPS
human_airway_average_expression.19	Gene expression feature, curated for PoPS
human_airway_average_expression.20	Gene expression feature, curated for PoPS
human_airway_average_expression.21	Gene expression feature, curated for PoPS
human_airway_average_expression.22	Gene expression feature, curated for PoPS
human_airway_average_expression.23	Gene expression feature, curated for PoPS
human_airway_average_expression.24	Gene expression feature, curated for PoPS
human_airway_average_expression.25	Gene expression feature, curated for PoPS
human_airway_average_expression.26	Gene expression feature, curated for PoPS
human_airway_average_expression.27	Gene expression feature, curated for PoPS
human_airway_diffexprs_down_genes_clusters.1	Gene expression feature, curated for PoPS
human_airway_diffexprs_down_genes_clusters.2	Gene expression feature, curated for PoPS
human_airway_diffexprs_down_genes_clusters.3	Gene expression feature, curated for PoPS
human_airway_diffexprs_down_genes_clusters.4	Gene expression feature, curated for PoPS
human_airway_diffexprs_down_genes_clusters.5	Gene expression feature, curated for PoPS
human_airway_diffexprs_down_genes_clusters.6	Gene expression feature, curated for PoPS
human_airway_diffexprs_down_genes_clusters.7	Gene expression feature, curated for PoPS
human_airway_diffexprs_down_genes_clusters.8	Gene expression feature, curated for PoPS
human_airway_diffexprs_down_genes_clusters.9	Gene expression feature, curated for PoPS
human_airway_diffexprs_down_genes_clusters.10	Gene expression feature, curated for PoPS
human_airway_diffexprs_down_genes_clusters.11	Gene expression feature, curated for PoPS
human_airway_diffexprs_down_genes_clusters.12	Gene expression feature, curated for PoPS
human_airway_diffexprs_down_genes_clusters.13	Gene expression feature, curated for PoPS
human_airway_diffexprs_down_genes_clusters.14	Gene expression feature, curated for PoPS
human_airway_diffexprs_down_genes_clusters.15	Gene expression feature, curated for PoPS
human_airway_diffexprs_down_genes_clusters.16	Gene expression feature, curated for PoPS
human_airway_diffexprs_down_genes_clusters.17	Gene expression feature, curated for PoPS
human_airway_diffexprs_down_genes_clusters.18	Gene expression feature, curated for PoPS
human_airway_diffexprs_down_genes_clusters.19	Gene expression feature, curated for PoPS
human_airway_diffexprs_down_genes_clusters.20	Gene expression feature, curated for PoPS
human_airway_diffexprs_down_genes_clusters.21	Gene expression feature, curated for PoPS
human_airway_diffexprs_down_genes_clusters.22	Gene expression feature, curated for PoPS
human_airway_diffexprs_down_genes_clusters.23	Gene expression feature, curated for PoPS
human_airway_diffexprs_down_genes_clusters.24	Gene expression feature, curated for PoPS
human_airway_diffexprs_down_genes_clusters.25	Gene expression feature, curated for PoPS
human_airway_diffexprs_down_genes_clusters.26	Gene expression feature, curated for PoPS
human_airway_diffexprs_down_genes_clusters_pre_def.1	Gene expression feature, curated for PoPS
human_airway_diffexprs_down_genes_clusters_pre_def.2	Gene expression feature, curated for PoPS
human_airway_diffexprs_down_genes_clusters_pre_def.3	Gene expression feature, curated for PoPS
human_airway_diffexprs_down_genes_clusters_pre_def.4	Gene expression feature, curated for PoPS
human_airway_diffexprs_down_genes_clusters_pre_def.5	Gene expression feature, curated for PoPS
human_airway_diffexprs_down_genes_clusters_pre_def.6	Gene expression feature, curated for PoPS
human_airway_diffexprs_down_genes_clusters_pre_def.7	Gene expression feature, curated for PoPS
human_airway_diffexprs_down_genes_clusters_pre_def.8	Gene expression feature, curated for PoPS
human_airway_diffexprs_down_genes_clusters_pre_def.9	Gene expression feature, curated for PoPS
human_airway_diffexprs_down_genes_clusters_pre_def.10	Gene expression feature, curated for PoPS
human_airway_diffexprs_down_genes_clusters_pre_def.11	Gene expression feature, curated for PoPS
human_airway_diffexprs_down_genes_clusters_pre_def.12	Gene expression feature, curated for PoPS
human_airway_diffexprs_down_genes_clusters_pre_def.13	Gene expression feature, curated for PoPS
human_airway_diffexprs_down_genes_clusters_pre_def.14	Gene expression feature, curated for PoPS
human_airway_diffexprs_down_genes_clusters_pre_def.15	Gene expression feature, curated for PoPS
human_airway_diffexprs_down_genes_clusters_pre_def.16	Gene expression feature, curated for PoPS
human_airway_diffexprs_down_genes_clusters_pre_def.17	Gene expression feature, curated for PoPS
human_airway_diffexprs_down_genes_clusters_pre_def.18	Gene expression feature, curated for PoPS
human_airway_diffexprs_down_genes_clusters_pre_def.19	Gene expression feature, curated for PoPS
human_airway_diffexprs_down_genes_clusters_pre_def.20	Gene expression feature, curated for PoPS
human_airway_diffexprs_down_genes_clusters_pre_def.21	Gene expression feature, curated for PoPS
human_airway_diffexprs_down_genes_clusters_pre_def.22	Gene expression feature, curated for PoPS
human_airway_diffexprs_down_genes_clusters_pre_def.23	Gene expression feature, curated for PoPS
human_airway_diffexprs_down_genes_clusters_pre_def.24	Gene expression feature, curated for PoPS
human_airway_diffexprs_down_genes_clusters_pre_def.25	Gene expression feature, curated for PoPS
human_airway_diffexprs_down_genes_clusters_pre_def.26	Gene expression feature, curated for PoPS
human_airway_diffexprs_down_genes_clusters_pre_def.27	Gene expression feature, curated for PoPS
human_airway_diffexprs_down_genes_clusters_pre_def.28	Gene expression feature, curated for PoPS
human_airway_diffexprs_genes_clusters.1	Gene expression feature, curated for PoPS
human_airway_diffexprs_genes_clusters.2	Gene expression feature, curated for PoPS
human_airway_diffexprs_genes_clusters.3	Gene expression feature, curated for PoPS
human_airway_diffexprs_genes_clusters.4	Gene expression feature, curated for PoPS
human_airway_diffexprs_genes_clusters.5	Gene expression feature, curated for PoPS
human_airway_diffexprs_genes_clusters.6	Gene expression feature, curated for PoPS
human_airway_diffexprs_genes_clusters.7	Gene expression feature, curated for PoPS
human_airway_diffexprs_genes_clusters.8	Gene expression feature, curated for PoPS
human_airway_diffexprs_genes_clusters.9	Gene expression feature, curated for PoPS
human_airway_diffexprs_genes_clusters.10	Gene expression feature, curated for PoPS
human_airway_diffexprs_genes_clusters.11	Gene expression feature, curated for PoPS
human_airway_diffexprs_genes_clusters.12	Gene expression feature, curated for PoPS
human_airway_diffexprs_genes_clusters.13	Gene expression feature, curated for PoPS
human_airway_diffexprs_genes_clusters.14	Gene expression feature, curated for PoPS
human_airway_diffexprs_genes_clusters.15	Gene expression feature, curated for PoPS
human_airway_diffexprs_genes_clusters.16	Gene expression feature, curated for PoPS
human_airway_diffexprs_genes_clusters.17	Gene expression feature, curated for PoPS
human_airway_diffexprs_genes_clusters.18	Gene expression feature, curated for PoPS
human_airway_diffexprs_genes_clusters.19	Gene expression feature, curated for PoPS
human_airway_diffexprs_genes_clusters.20	Gene expression feature, curated for PoPS
human_airway_diffexprs_genes_clusters.21	Gene expression feature, curated for PoPS
human_airway_diffexprs_genes_clusters.22	Gene expression feature, curated for PoPS
human_airway_diffexprs_genes_clusters.23	Gene expression feature, curated for PoPS
human_airway_diffexprs_genes_clusters.24	Gene expression feature, curated for PoPS
human_airway_diffexprs_genes_clusters.25	Gene expression feature, curated for PoPS
human_airway_diffexprs_genes_clusters.26	Gene expression feature, curated for PoPS
human_airway_diffexprs_genes_clusters_pre_def.1	Gene expression feature, curated for PoPS
human_airway_diffexprs_genes_clusters_pre_def.2	Gene expression feature, curated for PoPS
human_airway_diffexprs_genes_clusters_pre_def.3	Gene expression feature, curated for PoPS
human_airway_diffexprs_genes_clusters_pre_def.4	Gene expression feature, curated for PoPS
human_airway_diffexprs_genes_clusters_pre_def.5	Gene expression feature, curated for PoPS
human_airway_diffexprs_genes_clusters_pre_def.6	Gene expression feature, curated for PoPS
human_airway_diffexprs_genes_clusters_pre_def.7	Gene expression feature, curated for PoPS
human_airway_diffexprs_genes_clusters_pre_def.8	Gene expression feature, curated for PoPS
human_airway_diffexprs_genes_clusters_pre_def.9	Gene expression feature, curated for PoPS
human_airway_diffexprs_genes_clusters_pre_def.10	Gene expression feature, curated for PoPS
human_airway_diffexprs_genes_clusters_pre_def.11	Gene expression feature, curated for PoPS
human_airway_diffexprs_genes_clusters_pre_def.12	Gene expression feature, curated for PoPS
human_airway_diffexprs_genes_clusters_pre_def.13	Gene expression feature, curated for PoPS
human_airway_diffexprs_genes_clusters_pre_def.14	Gene expression feature, curated for PoPS
human_airway_diffexprs_genes_clusters_pre_def.15	Gene expression feature, curated for PoPS
human_airway_diffexprs_genes_clusters_pre_def.16	Gene expression feature, curated for PoPS
human_airway_diffexprs_genes_clusters_pre_def.17	Gene expression feature, curated for PoPS
human_airway_diffexprs_genes_clusters_pre_def.18	Gene expression feature, curated for PoPS
human_airway_diffexprs_genes_clusters_pre_def.19	Gene expression feature, curated for PoPS
human_airway_diffexprs_genes_clusters_pre_def.20	Gene expression feature, curated for PoPS
human_airway_diffexprs_genes_clusters_pre_def.21	Gene expression feature, curated for PoPS
human_airway_diffexprs_genes_clusters_pre_def.22	Gene expression feature, curated for PoPS
human_airway_diffexprs_genes_clusters_pre_def.23	Gene expression feature, curated for PoPS
human_airway_diffexprs_genes_clusters_pre_def.24	Gene expression feature, curated for PoPS
human_airway_diffexprs_genes_clusters_pre_def.25	Gene expression feature, curated for PoPS
human_airway_diffexprs_genes_clusters_pre_def.26	Gene expression feature, curated for PoPS
human_airway_diffexprs_genes_clusters_pre_def.27	Gene expression feature, curated for PoPS
human_airway_diffexprs_genes_clusters_pre_def.28	Gene expression feature, curated for PoPS
human_airway_diffexprs_tstat_clusters.1	Gene expression feature, curated for PoPS
human_airway_diffexprs_tstat_clusters.2	Gene expression feature, curated for PoPS
human_airway_diffexprs_tstat_clusters.3	Gene expression feature, curated for PoPS
human_airway_diffexprs_tstat_clusters.4	Gene expression feature, curated for PoPS
human_airway_diffexprs_tstat_clusters.5	Gene expression feature, curated for PoPS
human_airway_diffexprs_tstat_clusters.6	Gene expression feature, curated for PoPS
human_airway_diffexprs_tstat_clusters.7	Gene expression feature, curated for PoPS
human_airway_diffexprs_tstat_clusters.8	Gene expression feature, curated for PoPS
human_airway_diffexprs_tstat_clusters.9	Gene expression feature, curated for PoPS
human_airway_diffexprs_tstat_clusters.10	Gene expression feature, curated for PoPS
human_airway_diffexprs_tstat_clusters.11	Gene expression feature, curated for PoPS
human_airway_diffexprs_tstat_clusters.12	Gene expression feature, curated for PoPS
human_airway_diffexprs_tstat_clusters.13	Gene expression feature, curated for PoPS
human_airway_diffexprs_tstat_clusters.14	Gene expression feature, curated for PoPS
human_airway_diffexprs_tstat_clusters.15	Gene expression feature, curated for PoPS
human_airway_diffexprs_tstat_clusters.16	Gene expression feature, curated for PoPS
human_airway_diffexprs_tstat_clusters.17	Gene expression feature, curated for PoPS
human_airway_diffexprs_tstat_clusters.18	Gene expression feature, curated for PoPS
human_airway_diffexprs_tstat_clusters.19	Gene expression feature, curated for PoPS
human_airway_diffexprs_tstat_clusters.20	Gene expression feature, curated for PoPS
human_airway_diffexprs_tstat_clusters.21	Gene expression feature, curated for PoPS
human_airway_diffexprs_tstat_clusters.22	Gene expression feature, curated for PoPS
human_airway_diffexprs_tstat_clusters.23	Gene expression feature, curated for PoPS
human_airway_diffexprs_tstat_clusters.24	Gene expression feature, curated for PoPS
human_airway_diffexprs_tstat_clusters.25	Gene expression feature, curated for PoPS
human_airway_diffexprs_tstat_clusters.26	Gene expression feature, curated for PoPS
human_airway_diffexprs_tstat_clusters_pre_def.1	Gene expression feature, curated for PoPS
human_airway_diffexprs_tstat_clusters_pre_def.2	Gene expression feature, curated for PoPS
human_airway_diffexprs_tstat_clusters_pre_def.3	Gene expression feature, curated for PoPS
human_airway_diffexprs_tstat_clusters_pre_def.4	Gene expression feature, curated for PoPS
human_airway_diffexprs_tstat_clusters_pre_def.5	Gene expression feature, curated for PoPS
human_airway_diffexprs_tstat_clusters_pre_def.6	Gene expression feature, curated for PoPS
human_airway_diffexprs_tstat_clusters_pre_def.7	Gene expression feature, curated for PoPS
human_airway_diffexprs_tstat_clusters_pre_def.8	Gene expression feature, curated for PoPS
human_airway_diffexprs_tstat_clusters_pre_def.9	Gene expression feature, curated for PoPS
human_airway_diffexprs_tstat_clusters_pre_def.10	Gene expression feature, curated for PoPS
human_airway_diffexprs_tstat_clusters_pre_def.11	Gene expression feature, curated for PoPS
human_airway_diffexprs_tstat_clusters_pre_def.12	Gene expression feature, curated for PoPS
human_airway_diffexprs_tstat_clusters_pre_def.13	Gene expression feature, curated for PoPS
human_airway_diffexprs_tstat_clusters_pre_def.14	Gene expression feature, curated for PoPS
human_airway_diffexprs_tstat_clusters_pre_def.15	Gene expression feature, curated for PoPS
human_airway_diffexprs_tstat_clusters_pre_def.16	Gene expression feature, curated for PoPS
human_airway_diffexprs_tstat_clusters_pre_def.17	Gene expression feature, curated for PoPS
human_airway_diffexprs_tstat_clusters_pre_def.18	Gene expression feature, curated for PoPS
human_airway_diffexprs_tstat_clusters_pre_def.19	Gene expression feature, curated for PoPS
human_airway_diffexprs_tstat_clusters_pre_def.20	Gene expression feature, curated for PoPS
human_airway_diffexprs_tstat_clusters_pre_def.21	Gene expression feature, curated for PoPS
human_airway_diffexprs_tstat_clusters_pre_def.22	Gene expression feature, curated for PoPS
human_airway_diffexprs_tstat_clusters_pre_def.23	Gene expression feature, curated for PoPS
human_airway_diffexprs_tstat_clusters_pre_def.24	Gene expression feature, curated for PoPS
human_airway_diffexprs_tstat_clusters_pre_def.25	Gene expression feature, curated for PoPS
human_airway_diffexprs_tstat_clusters_pre_def.26	Gene expression feature, curated for PoPS
human_airway_diffexprs_tstat_clusters_pre_def.27	Gene expression feature, curated for PoPS
human_airway_diffexprs_tstat_clusters_pre_def.28	Gene expression feature, curated for PoPS
human_airway_projected_icaloadings.1	Gene expression feature, curated for PoPS
human_airway_projected_icaloadings.2	Gene expression feature, curated for PoPS
human_airway_projected_icaloadings.3	Gene expression feature, curated for PoPS
human_airway_projected_icaloadings.4	Gene expression feature, curated for PoPS
human_airway_projected_icaloadings.5	Gene expression feature, curated for PoPS
human_airway_projected_icaloadings.6	Gene expression feature, curated for PoPS
human_airway_projected_icaloadings.7	Gene expression feature, curated for PoPS
human_airway_projected_icaloadings.8	Gene expression feature, curated for PoPS
human_airway_projected_icaloadings.9	Gene expression feature, curated for PoPS
human_airway_projected_icaloadings.10	Gene expression feature, curated for PoPS
human_airway_projected_icaloadings.11	Gene expression feature, curated for PoPS
human_airway_projected_icaloadings.12	Gene expression feature, curated for PoPS
human_airway_projected_icaloadings.13	Gene expression feature, curated for PoPS
human_airway_projected_icaloadings.14	Gene expression feature, curated for PoPS
human_airway_projected_icaloadings.15	Gene expression feature, curated for PoPS
human_airway_projected_icaloadings.16	Gene expression feature, curated for PoPS
human_airway_projected_icaloadings.17	Gene expression feature, curated for PoPS
human_airway_projected_icaloadings.18	Gene expression feature, curated for PoPS
human_airway_projected_icaloadings.19	Gene expression feature, curated for PoPS
human_airway_projected_icaloadings.20	Gene expression feature, curated for PoPS
human_airway_projected_icaloadings.21	Gene expression feature, curated for PoPS
human_airway_projected_icaloadings.22	Gene expression feature, curated for PoPS
human_airway_projected_icaloadings.23	Gene expression feature, curated for PoPS
human_airway_projected_icaloadings.24	Gene expression feature, curated for PoPS
human_airway_projected_icaloadings.25	Gene expression feature, curated for PoPS
human_airway_projected_icaloadings.26	Gene expression feature, curated for PoPS
human_airway_projected_icaloadings.27	Gene expression feature, curated for PoPS
human_airway_projected_icaloadings.28	Gene expression feature, curated for PoPS
human_airway_projected_icaloadings.29	Gene expression feature, curated for PoPS
human_airway_projected_icaloadings.30	Gene expression feature, curated for PoPS
human_airway_projected_icaloadings.31	Gene expression feature, curated for PoPS
human_airway_projected_icaloadings.32	Gene expression feature, curated for PoPS
human_airway_projected_icaloadings.33	Gene expression feature, curated for PoPS
human_airway_projected_icaloadings.34	Gene expression feature, curated for PoPS
human_airway_projected_icaloadings.35	Gene expression feature, curated for PoPS
human_airway_projected_pcaloadings.1	Gene expression feature, curated for PoPS
human_airway_projected_pcaloadings.2	Gene expression feature, curated for PoPS
human_airway_projected_pcaloadings.3	Gene expression feature, curated for PoPS
human_airway_projected_pcaloadings.4	Gene expression feature, curated for PoPS
human_airway_projected_pcaloadings.5	Gene expression feature, curated for PoPS
human_airway_projected_pcaloadings.6	Gene expression feature, curated for PoPS
human_airway_projected_pcaloadings.7	Gene expression feature, curated for PoPS
human_airway_projected_pcaloadings.8	Gene expression feature, curated for PoPS
human_airway_projected_pcaloadings.9	Gene expression feature, curated for PoPS
human_airway_projected_pcaloadings.10	Gene expression feature, curated for PoPS
human_airway_projected_pcaloadings.11	Gene expression feature, curated for PoPS
human_airway_projected_pcaloadings.12	Gene expression feature, curated for PoPS
human_airway_projected_pcaloadings.13	Gene expression feature, curated for PoPS
human_airway_projected_pcaloadings.14	Gene expression feature, curated for PoPS
human_airway_projected_pcaloadings.15	Gene expression feature, curated for PoPS
human_airway_projected_pcaloadings.16	Gene expression feature, curated for PoPS
human_airway_projected_pcaloadings.17	Gene expression feature, curated for PoPS
human_airway_projected_pcaloadings.18	Gene expression feature, curated for PoPS
human_airway_projected_pcaloadings.19	Gene expression feature, curated for PoPS
human_airway_projected_pcaloadings.20	Gene expression feature, curated for PoPS
human_airway_projected_pcaloadings.21	Gene expression feature, curated for PoPS
human_airway_projected_pcaloadings.22	Gene expression feature, curated for PoPS
human_airway_projected_pcaloadings.23	Gene expression feature, curated for PoPS
human_airway_projected_pcaloadings.24	Gene expression feature, curated for PoPS
human_airway_projected_pcaloadings.25	Gene expression feature, curated for PoPS
human_airway_projected_pcaloadings.26	Gene expression feature, curated for PoPS
human_airway_projected_pcaloadings.27	Gene expression feature, curated for PoPS
human_airway_projected_pcaloadings.28	Gene expression feature, curated for PoPS
human_airway_projected_pcaloadings.29	Gene expression feature, curated for PoPS
human_airway_projected_pcaloadings.30	Gene expression feature, curated for PoPS
human_airway_projected_pcaloadings.31	Gene expression feature, curated for PoPS
human_airway_projected_pcaloadings.32	Gene expression feature, curated for PoPS
human_airway_projected_pcaloadings.33	Gene expression feature, curated for PoPS
human_airway_projected_pcaloadings.34	Gene expression feature, curated for PoPS
human_airway_projected_pcaloadings.35	Gene expression feature, curated for PoPS
human_airway_projected_pcaloadings.36	Gene expression feature, curated for PoPS
human_airway_projected_pcaloadings.37	Gene expression feature, curated for PoPS
human_airway_projected_pcaloadings.38	Gene expression feature, curated for PoPS
human_airway_projected_pcaloadings.39	Gene expression feature, curated for PoPS
human_airway_projected_pcaloadings.40	Gene expression feature, curated for PoPS
human_airway_projected_pcaloadings.41	Gene expression feature, curated for PoPS
human_airway_projected_pcaloadings.42	Gene expression feature, curated for PoPS
human_airway_projected_pcaloadings.43	Gene expression feature, curated for PoPS
human_airway_projected_pcaloadings.44	Gene expression feature, curated for PoPS
human_airway_projected_pcaloadings.45	Gene expression feature, curated for PoPS
human_airway_projected_pcaloadings.46	Gene expression feature, curated for PoPS
human_airway_projected_pcaloadings.47	Gene expression feature, curated for PoPS
human_airway_projected_pcaloadings.48	Gene expression feature, curated for PoPS
human_airway_projected_pcaloadings.49	Gene expression feature, curated for PoPS
human_airway_projected_pcaloadings.50	Gene expression feature, curated for PoPS
human_airway_projected_pcaloadings.51	Gene expression feature, curated for PoPS
human_airway_projected_pcaloadings.52	Gene expression feature, curated for PoPS
human_airway_projected_pcaloadings.53	Gene expression feature, curated for PoPS
human_airway_projected_pcaloadings.54	Gene expression feature, curated for PoPS
human_airway_projected_pcaloadings.55	Gene expression feature, curated for PoPS
human_airway_projected_pcaloadings.56	Gene expression feature, curated for PoPS
human_airway_projected_pcaloadings.57	Gene expression feature, curated for PoPS
human_airway_projected_pcaloadings.58	Gene expression feature, curated for PoPS
human_airway_projected_pcaloadings.59	Gene expression feature, curated for PoPS
human_airway_projected_pcaloadings.60	Gene expression feature, curated for PoPS
human_airway_projected_pcaloadings.61	Gene expression feature, curated for PoPS
human_airway_projected_pcaloadings.62	Gene expression feature, curated for PoPS
human_airway_projected_pcaloadings.63	Gene expression feature, curated for PoPS
human_airway_projected_pcaloadings.64	Gene expression feature, curated for PoPS
human_airway_projected_pcaloadings.65	Gene expression feature, curated for PoPS
human_airway_projected_pcaloadings.66	Gene expression feature, curated for PoPS
human_airway_projected_pcaloadings.67	Gene expression feature, curated for PoPS
human_airway_projected_pcaloadings.68	Gene expression feature, curated for PoPS
human_airway_projected_pcaloadings.69	Gene expression feature, curated for PoPS
human_airway_projected_pcaloadings.70	Gene expression feature, curated for PoPS
human_airway_projected_pcaloadings.71	Gene expression feature, curated for PoPS
human_airway_projected_pcaloadings.72	Gene expression feature, curated for PoPS
human_airway_projected_pcaloadings.73	Gene expression feature, curated for PoPS
human_airway_projected_pcaloadings.74	Gene expression feature, curated for PoPS
human_airway_projected_pcaloadings.75	Gene expression feature, curated for PoPS
human_airway_projected_pcaloadings.76	Gene expression feature, curated for PoPS
human_airway_projected_pcaloadings.77	Gene expression feature, curated for PoPS
human_airway_projected_pcaloadings.78	Gene expression feature, curated for PoPS
human_airway_projected_pcaloadings.79	Gene expression feature, curated for PoPS
human_airway_projected_pcaloadings.80	Gene expression feature, curated for PoPS
human_airway_projected_pcaloadings.81	Gene expression feature, curated for PoPS
human_airway_projected_pcaloadings.82	Gene expression feature, curated for PoPS
human_airway_projected_pcaloadings.83	Gene expression feature, curated for PoPS
human_airway_projected_pcaloadings.84	Gene expression feature, curated for PoPS
human_airway_projected_pcaloadings.85	Gene expression feature, curated for PoPS
human_airway_projected_pcaloadings.86	Gene expression feature, curated for PoPS
human_airway_projected_pcaloadings.87	Gene expression feature, curated for PoPS
human_airway_projected_pcaloadings.88	Gene expression feature, curated for PoPS
human_airway_projected_pcaloadings.89	Gene expression feature, curated for PoPS
human_airway_projected_pcaloadings.90	Gene expression feature, curated for PoPS
human_airway_projected_pcaloadings.91	Gene expression feature, curated for PoPS
human_airway_projected_pcaloadings.92	Gene expression feature, curated for PoPS
human_airway_projected_pcaloadings.93	Gene expression feature, curated for PoPS
human_airway_projected_pcaloadings.94	Gene expression feature, curated for PoPS
human_airway_projected_pcaloadings.95	Gene expression feature, curated for PoPS
human_airway_projected_pcaloadings.96	Gene expression feature, curated for PoPS
human_airway_projected_pcaloadings.97	Gene expression feature, curated for PoPS
human_airway_projected_pcaloadings.98	Gene expression feature, curated for PoPS
human_airway_projected_pcaloadings.99	Gene expression feature, curated for PoPS
human_airway_projected_pcaloadings.100	Gene expression feature, curated for PoPS
human_airway_projected_pcaloadings_clusters.1	Gene expression feature, curated for PoPS
human_airway_projected_pcaloadings_clusters.2	Gene expression feature, curated for PoPS
human_airway_projected_pcaloadings_clusters.3	Gene expression feature, curated for PoPS
human_airway_projected_pcaloadings_clusters.4	Gene expression feature, curated for PoPS
human_airway_projected_pcaloadings_clusters.5	Gene expression feature, curated for PoPS
human_airway_projected_pcaloadings_clusters.6	Gene expression feature, curated for PoPS
human_airway_projected_pcaloadings_clusters.7	Gene expression feature, curated for PoPS
human_airway_projected_pcaloadings_clusters.8	Gene expression feature, curated for PoPS
human_airway_projected_pcaloadings_clusters.9	Gene expression feature, curated for PoPS
human_airway_projected_pcaloadings_clusters.10	Gene expression feature, curated for PoPS
human_airway_projected_pcaloadings_clusters.11	Gene expression feature, curated for PoPS
human_airway_projected_pcaloadings_clusters.12	Gene expression feature, curated for PoPS
human_airway_projected_pcaloadings_clusters.13	Gene expression feature, curated for PoPS
human_airway_projected_pcaloadings_clusters.14	Gene expression feature, curated for PoPS
human_airway_projected_pcaloadings_clusters.15	Gene expression feature, curated for PoPS
human_airway_projected_pcaloadings_clusters.16	Gene expression feature, curated for PoPS
human_airway_projected_pcaloadings_clusters.17	Gene expression feature, curated for PoPS
human_airway_projected_pcaloadings_clusters.18	Gene expression feature, curated for PoPS
human_airway_projected_pcaloadings_clusters.19	Gene expression feature, curated for PoPS
human_airway_projected_pcaloadings_clusters.20	Gene expression feature, curated for PoPS
human_airway_projected_pcaloadings_clusters.21	Gene expression feature, curated for PoPS
human_airway_projected_pcaloadings_clusters.22	Gene expression feature, curated for PoPS
human_airway_projected_pcaloadings_clusters.23	Gene expression feature, curated for PoPS
human_airway_projected_pcaloadings_clusters.24	Gene expression feature, curated for PoPS
human_airway_projected_pcaloadings_clusters.25	Gene expression feature, curated for PoPS
human_airway_projected_pcaloadings_clusters.26	Gene expression feature, curated for PoPS
human_airway_projected_pcaloadings_clusters.27	Gene expression feature, curated for PoPS
human_airway_projected_pcaloadings_clusters.28	Gene expression feature, curated for PoPS
human_airway_projected_pcaloadings_clusters.29	Gene expression feature, curated for PoPS
human_airway_projected_pcaloadings_clusters.30	Gene expression feature, curated for PoPS
human_airway_projected_pcaloadings_clusters.31	Gene expression feature, curated for PoPS
human_airway_projected_pcaloadings_clusters.32	Gene expression feature, curated for PoPS
human_airway_projected_pcaloadings_clusters.33	Gene expression feature, curated for PoPS
human_airway_projected_pcaloadings_clusters.34	Gene expression feature, curated for PoPS
human_airway_projected_pcaloadings_clusters.35	Gene expression feature, curated for PoPS
human_airway_projected_pcaloadings_clusters.36	Gene expression feature, curated for PoPS
human_airway_projected_pcaloadings_clusters.37	Gene expression feature, curated for PoPS
human_airway_projected_pcaloadings_clusters.38	Gene expression feature, curated for PoPS
human_airway_projected_pcaloadings_clusters.39	Gene expression feature, curated for PoPS
human_airway_projected_pcaloadings_clusters.40	Gene expression feature, curated for PoPS
human_airway_projected_pcaloadings_clusters.41	Gene expression feature, curated for PoPS
human_airway_projected_pcaloadings_clusters.42	Gene expression feature, curated for PoPS
human_airway_projected_pcaloadings_clusters.43	Gene expression feature, curated for PoPS
human_airway_projected_pcaloadings_clusters.44	Gene expression feature, curated for PoPS
human_airway_projected_pcaloadings_clusters.45	Gene expression feature, curated for PoPS
human_airway_projected_pcaloadings_clusters.46	Gene expression feature, curated for PoPS
human_airway_projected_pcaloadings_clusters.47	Gene expression feature, curated for PoPS
human_airway_projected_pcaloadings_clusters.48	Gene expression feature, curated for PoPS
human_airway_projected_pcaloadings_clusters.49	Gene expression feature, curated for PoPS
human_airway_projected_pcaloadings_clusters.50	Gene expression feature, curated for PoPS
human_airway_projected_pcaloadings_clusters.51	Gene expression feature, curated for PoPS
human_airway_projected_pcaloadings_clusters.52	Gene expression feature, curated for PoPS
human_airway_projected_pcaloadings_clusters.53	Gene expression feature, curated for PoPS
human_airway_projected_pcaloadings_clusters.54	Gene expression feature, curated for PoPS
human_airway_projected_pcaloadings_clusters.55	Gene expression feature, curated for PoPS
human_airway_projected_pcaloadings_clusters.56	Gene expression feature, curated for PoPS
human_airway_projected_pcaloadings_clusters.57	Gene expression feature, curated for PoPS
human_airway_projected_pcaloadings_clusters.58	Gene expression feature, curated for PoPS
human_airway_projected_pcaloadings_clusters.59	Gene expression feature, curated for PoPS
human_airway_projected_pcaloadings_clusters.60	Gene expression feature, curated for PoPS
human_airway_projected_pcaloadings_clusters.61	Gene expression feature, curated for PoPS
human_airway_projected_pcaloadings_clusters.62	Gene expression feature, curated for PoPS
human_airway_projected_pcaloadings_clusters.63	Gene expression feature, curated for PoPS
human_airway_projected_pcaloadings_clusters.64	Gene expression feature, curated for PoPS
human_airway_projected_pcaloadings_clusters.65	Gene expression feature, curated for PoPS
human_airway_projected_pcaloadings_clusters.66	Gene expression feature, curated for PoPS
human_airway_projected_pcaloadings_clusters.67	Gene expression feature, curated for PoPS
human_airway_projected_pcaloadings_clusters.68	Gene expression feature, curated for PoPS
human_airway_projected_pcaloadings_clusters.69	Gene expression feature, curated for PoPS
human_airway_projected_pcaloadings_clusters.70	Gene expression feature, curated for PoPS
human_airway_projected_pcaloadings_clusters.71	Gene expression feature, curated for PoPS
human_airway_projected_pcaloadings_clusters.72	Gene expression feature, curated for PoPS
human_airway_projected_pcaloadings_clusters.73	Gene expression feature, curated for PoPS
human_airway_projected_pcaloadings_clusters.74	Gene expression feature, curated for PoPS
human_airway_projected_pcaloadings_clusters.75	Gene expression feature, curated for PoPS
human_airway_projected_pcaloadings_clusters.76	Gene expression feature, curated for PoPS
human_airway_projected_pcaloadings_clusters.77	Gene expression feature, curated for PoPS
human_airway_projected_pcaloadings_clusters.78	Gene expression feature, curated for PoPS
human_airway_projected_pcaloadings_clusters.79	Gene expression feature, curated for PoPS
human_airway_projected_pcaloadings_clusters.80	Gene expression feature, curated for PoPS
human_airway_projected_pcaloadings_clusters.81	Gene expression feature, curated for PoPS
human_airway_projected_pcaloadings_clusters.82	Gene expression feature, curated for PoPS
human_airway_projected_pcaloadings_clusters.83	Gene expression feature, curated for PoPS
human_airway_projected_pcaloadings_clusters.84	Gene expression feature, curated for PoPS
human_airway_projected_pcaloadings_clusters.85	Gene expression feature, curated for PoPS
human_airway_projected_pcaloadings_clusters.86	Gene expression feature, curated for PoPS
human_airway_projected_pcaloadings_clusters.87	Gene expression feature, curated for PoPS
human_airway_projected_pcaloadings_clusters.88	Gene expression feature, curated for PoPS
human_airway_projected_pcaloadings_clusters.89	Gene expression feature, curated for PoPS
human_airway_projected_pcaloadings_clusters.90	Gene expression feature, curated for PoPS
human_airway_projected_pcaloadings_clusters.91	Gene expression feature, curated for PoPS
human_airway_projected_pcaloadings_clusters.92	Gene expression feature, curated for PoPS
human_airway_projected_pcaloadings_clusters.93	Gene expression feature, curated for PoPS
human_airway_projected_pcaloadings_clusters.94	Gene expression feature, curated for PoPS
human_airway_projected_pcaloadings_clusters.95	Gene expression feature, curated for PoPS
human_airway_projected_pcaloadings_clusters.96	Gene expression feature, curated for PoPS
human_airway_projected_pcaloadings_clusters.97	Gene expression feature, curated for PoPS
human_airway_projected_pcaloadings_clusters.98	Gene expression feature, curated for PoPS
human_airway_projected_pcaloadings_clusters.99	Gene expression feature, curated for PoPS
human_airway_projected_pcaloadings_clusters.100	Gene expression feature, curated for PoPS
human_airway_projected_pcaloadings_clusters.101	Gene expression feature, curated for PoPS
human_airway_projected_pcaloadings_clusters.102	Gene expression feature, curated for PoPS
human_airway_projected_pcaloadings_clusters.103	Gene expression feature, curated for PoPS
human_airway_projected_pcaloadings_clusters.104	Gene expression feature, curated for PoPS
human_airway_projected_pcaloadings_clusters.105	Gene expression feature, curated for PoPS
human_airway_projected_pcaloadings_clusters.106	Gene expression feature, curated for PoPS
human_airway_projected_pcaloadings_clusters.107	Gene expression feature, curated for PoPS
human_airway_projected_pcaloadings_clusters.108	Gene expression feature, curated for PoPS
human_airway_projected_pcaloadings_clusters.109	Gene expression feature, curated for PoPS
human_airway_projected_pcaloadings_clusters.110	Gene expression feature, curated for PoPS
human_airway_projected_pcaloadings_clusters.111	Gene expression feature, curated for PoPS
human_airway_projected_pcaloadings_clusters.112	Gene expression feature, curated for PoPS
human_airway_projected_pcaloadings_clusters.113	Gene expression feature, curated for PoPS
human_airway_projected_pcaloadings_clusters.114	Gene expression feature, curated for PoPS
human_airway_projected_pcaloadings_clusters.115	Gene expression feature, curated for PoPS
human_airway_projected_pcaloadings_clusters.116	Gene expression feature, curated for PoPS
human_airway_projected_pcaloadings_clusters.117	Gene expression feature, curated for PoPS
human_airway_projected_pcaloadings_clusters.118	Gene expression feature, curated for PoPS
human_airway_projected_pcaloadings_clusters.119	Gene expression feature, curated for PoPS
human_airway_projected_pcaloadings_clusters.120	Gene expression feature, curated for PoPS
human_airway_projected_pcaloadings_clusters.121	Gene expression feature, curated for PoPS
human_airway_projected_pcaloadings_clusters.122	Gene expression feature, curated for PoPS
human_airway_projected_pcaloadings_clusters.123	Gene expression feature, curated for PoPS
human_airway_projected_pcaloadings_clusters.124	Gene expression feature, curated for PoPS
human_airway_projected_pcaloadings_clusters.125	Gene expression feature, curated for PoPS
human_airway_projected_pcaloadings_clusters.126	Gene expression feature, curated for PoPS
human_airway_projected_pcaloadings_clusters.127	Gene expression feature, curated for PoPS
human_airway_projected_pcaloadings_clusters.128	Gene expression feature, curated for PoPS
human_airway_projected_pcaloadings_clusters.129	Gene expression feature, curated for PoPS
human_airway_projected_pcaloadings_clusters.130	Gene expression feature, curated for PoPS
human_airway_projected_pcaloadings_clusters.131	Gene expression feature, curated for PoPS
human_airway_projected_pcaloadings_clusters.132	Gene expression feature, curated for PoPS
human_airway_projected_pcaloadings_clusters.133	Gene expression feature, curated for PoPS
human_airway_projected_pcaloadings_clusters.134	Gene expression feature, curated for PoPS
human_airway_projected_pcaloadings_clusters.135	Gene expression feature, curated for PoPS
human_airway_projected_pcaloadings_clusters.136	Gene expression feature, curated for PoPS
human_airway_projected_pcaloadings_clusters.137	Gene expression feature, curated for PoPS
human_airway_projected_pcaloadings_clusters.138	Gene expression feature, curated for PoPS
human_airway_projected_pcaloadings_clusters.139	Gene expression feature, curated for PoPS
human_airway_projected_pcaloadings_clusters.140	Gene expression feature, curated for PoPS
human_airway_projected_pcaloadings_clusters.141	Gene expression feature, curated for PoPS
human_airway_projected_pcaloadings_clusters.142	Gene expression feature, curated for PoPS
human_airway_projected_pcaloadings_clusters.143	Gene expression feature, curated for PoPS
human_airway_projected_pcaloadings_clusters.144	Gene expression feature, curated for PoPS
human_airway_projected_pcaloadings_clusters.145	Gene expression feature, curated for PoPS
human_airway_projected_pcaloadings_clusters.146	Gene expression feature, curated for PoPS
human_airway_projected_pcaloadings_clusters.147	Gene expression feature, curated for PoPS
human_airway_projected_pcaloadings_clusters.148	Gene expression feature, curated for PoPS
human_airway_projected_pcaloadings_clusters.149	Gene expression feature, curated for PoPS
human_airway_projected_pcaloadings_clusters.150	Gene expression feature, curated for PoPS
human_airway_projected_pcaloadings_clusters.151	Gene expression feature, curated for PoPS
human_airway_projected_pcaloadings_clusters.152	Gene expression feature, curated for PoPS
human_airway_projected_pcaloadings_clusters.153	Gene expression feature, curated for PoPS
human_airway_projected_pcaloadings_clusters.154	Gene expression feature, curated for PoPS
human_airway_projected_pcaloadings_clusters.155	Gene expression feature, curated for PoPS
human_airway_projected_pcaloadings_clusters.156	Gene expression feature, curated for PoPS
human_airway_projected_pcaloadings_clusters.157	Gene expression feature, curated for PoPS
human_airway_projected_pcaloadings_clusters.158	Gene expression feature, curated for PoPS
human_airway_projected_pcaloadings_clusters.159	Gene expression feature, curated for PoPS
human_airway_projected_pcaloadings_clusters.160	Gene expression feature, curated for PoPS
human_airway_projected_pcaloadings_clusters.161	Gene expression feature, curated for PoPS
human_airway_projected_pcaloadings_clusters.162	Gene expression feature, curated for PoPS
human_airway_projected_pcaloadings_clusters.163	Gene expression feature, curated for PoPS
human_airway_projected_pcaloadings_clusters.164	Gene expression feature, curated for PoPS
human_airway_projected_pcaloadings_clusters.165	Gene expression feature, curated for PoPS
human_airway_projected_pcaloadings_clusters.166	Gene expression feature, curated for PoPS
human_airway_projected_pcaloadings_clusters.167	Gene expression feature, curated for PoPS
human_airway_projected_pcaloadings_clusters.168	Gene expression feature, curated for PoPS
human_airway_projected_pcaloadings_clusters.169	Gene expression feature, curated for PoPS
human_airway_projected_pcaloadings_clusters.170	Gene expression feature, curated for PoPS
human_airway_projected_pcaloadings_clusters.171	Gene expression feature, curated for PoPS
human_airway_projected_pcaloadings_clusters.172	Gene expression feature, curated for PoPS
human_airway_projected_pcaloadings_clusters.173	Gene expression feature, curated for PoPS
human_airway_projected_pcaloadings_clusters.174	Gene expression feature, curated for PoPS
human_airway_projected_pcaloadings_clusters.175	Gene expression feature, curated for PoPS
human_airway_projected_pcaloadings_clusters.176	Gene expression feature, curated for PoPS
human_airway_projected_pcaloadings_clusters.177	Gene expression feature, curated for PoPS
human_airway_projected_pcaloadings_clusters.178	Gene expression feature, curated for PoPS
human_airway_projected_pcaloadings_clusters.179	Gene expression feature, curated for PoPS
human_airway_projected_pcaloadings_clusters.180	Gene expression feature, curated for PoPS
human_airway_projected_pcaloadings_clusters.181	Gene expression feature, curated for PoPS
human_airway_projected_pcaloadings_clusters.182	Gene expression feature, curated for PoPS
human_airway_projected_pcaloadings_clusters.183	Gene expression feature, curated for PoPS
human_airway_projected_pcaloadings_clusters.184	Gene expression feature, curated for PoPS
human_airway_projected_pcaloadings_clusters.185	Gene expression feature, curated for PoPS
human_airway_projected_pcaloadings_clusters.186	Gene expression feature, curated for PoPS
human_airway_projected_pcaloadings_clusters.187	Gene expression feature, curated for PoPS
human_airway_projected_pcaloadings_clusters.188	Gene expression feature, curated for PoPS
human_airway_projected_pcaloadings_clusters.189	Gene expression feature, curated for PoPS
human_airway_projected_pcaloadings_clusters.190	Gene expression feature, curated for PoPS
human_airway_projected_pcaloadings_clusters.191	Gene expression feature, curated for PoPS
human_airway_projected_pcaloadings_clusters.192	Gene expression feature, curated for PoPS
human_airway_projected_pcaloadings_clusters.193	Gene expression feature, curated for PoPS
human_airway_projected_pcaloadings_clusters.194	Gene expression feature, curated for PoPS
human_airway_projected_pcaloadings_clusters.195	Gene expression feature, curated for PoPS
human_airway_projected_pcaloadings_clusters.196	Gene expression feature, curated for PoPS
human_airway_projected_pcaloadings_clusters.197	Gene expression feature, curated for PoPS
human_airway_projected_pcaloadings_clusters.198	Gene expression feature, curated for PoPS
human_airway_projected_pcaloadings_clusters.199	Gene expression feature, curated for PoPS
human_airway_projected_pcaloadings_clusters.200	Gene expression feature, curated for PoPS
human_airway_projected_pcaloadings_clusters.201	Gene expression feature, curated for PoPS
human_airway_projected_pcaloadings_clusters.202	Gene expression feature, curated for PoPS
human_airway_projected_pcaloadings_clusters.203	Gene expression feature, curated for PoPS
human_airway_projected_pcaloadings_clusters.204	Gene expression feature, curated for PoPS
human_airway_projected_pcaloadings_clusters.205	Gene expression feature, curated for PoPS
human_airway_projected_pcaloadings_clusters.206	Gene expression feature, curated for PoPS
human_airway_projected_pcaloadings_clusters.207	Gene expression feature, curated for PoPS
human_airway_projected_pcaloadings_clusters.208	Gene expression feature, curated for PoPS
human_airway_projected_pcaloadings_clusters.209	Gene expression feature, curated for PoPS
human_airway_projected_pcaloadings_clusters.210	Gene expression feature, curated for PoPS
human_airway_projected_pcaloadings_clusters.211	Gene expression feature, curated for PoPS
human_airway_projected_pcaloadings_clusters.212	Gene expression feature, curated for PoPS
human_airway_projected_pcaloadings_clusters.213	Gene expression feature, curated for PoPS
human_airway_projected_pcaloadings_clusters.214	Gene expression feature, curated for PoPS
human_airway_projected_pcaloadings_clusters.215	Gene expression feature, curated for PoPS
human_airway_projected_pcaloadings_clusters.216	Gene expression feature, curated for PoPS
human_airway_projected_pcaloadings_clusters.217	Gene expression feature, curated for PoPS
human_airway_projected_pcaloadings_clusters.218	Gene expression feature, curated for PoPS
human_airway_projected_pcaloadings_clusters.219	Gene expression feature, curated for PoPS
human_airway_projected_pcaloadings_clusters.220	Gene expression feature, curated for PoPS
human_airway_projected_pcaloadings_clusters.221	Gene expression feature, curated for PoPS
human_airway_projected_pcaloadings_clusters.222	Gene expression feature, curated for PoPS
human_airway_projected_pcaloadings_clusters.223	Gene expression feature, curated for PoPS
human_airway_projected_pcaloadings_clusters.224	Gene expression feature, curated for PoPS
human_airway_projected_pcaloadings_clusters.225	Gene expression feature, curated for PoPS
human_airway_projected_pcaloadings_clusters.226	Gene expression feature, curated for PoPS
human_airway_projected_pcaloadings_clusters.227	Gene expression feature, curated for PoPS
human_airway_projected_pcaloadings_clusters.228	Gene expression feature, curated for PoPS
human_airway_projected_pcaloadings_clusters.229	Gene expression feature, curated for PoPS
human_airway_projected_pcaloadings_clusters.230	Gene expression feature, curated for PoPS
human_airway_projected_pcaloadings_clusters.231	Gene expression feature, curated for PoPS
human_airway_projected_pcaloadings_clusters.232	Gene expression feature, curated for PoPS
human_airway_projected_pcaloadings_clusters.233	Gene expression feature, curated for PoPS
human_airway_projected_pcaloadings_clusters.234	Gene expression feature, curated for PoPS
human_airway_projected_pcaloadings_clusters.235	Gene expression feature, curated for PoPS
human_airway_projected_pcaloadings_clusters.236	Gene expression feature, curated for PoPS
human_airway_projected_pcaloadings_clusters.237	Gene expression feature, curated for PoPS
human_airway_projected_pcaloadings_clusters.238	Gene expression feature, curated for PoPS
human_airway_projected_pcaloadings_clusters.239	Gene expression feature, curated for PoPS
human_airway_projected_pcaloadings_clusters.240	Gene expression feature, curated for PoPS
human_airway_projected_pcaloadings_clusters_pre_def.1	Gene expression feature, curated for PoPS
human_airway_projected_pcaloadings_clusters_pre_def.2	Gene expression feature, curated for PoPS
human_airway_projected_pcaloadings_clusters_pre_def.3	Gene expression feature, curated for PoPS
human_airway_projected_pcaloadings_clusters_pre_def.4	Gene expression feature, curated for PoPS
human_airway_projected_pcaloadings_clusters_pre_def.5	Gene expression feature, curated for PoPS
human_airway_projected_pcaloadings_clusters_pre_def.6	Gene expression feature, curated for PoPS
human_airway_projected_pcaloadings_clusters_pre_def.7	Gene expression feature, curated for PoPS
human_airway_projected_pcaloadings_clusters_pre_def.8	Gene expression feature, curated for PoPS
human_airway_projected_pcaloadings_clusters_pre_def.9	Gene expression feature, curated for PoPS
human_airway_projected_pcaloadings_clusters_pre_def.10	Gene expression feature, curated for PoPS
human_airway_projected_pcaloadings_clusters_pre_def.11	Gene expression feature, curated for PoPS
human_airway_projected_pcaloadings_clusters_pre_def.12	Gene expression feature, curated for PoPS
human_airway_projected_pcaloadings_clusters_pre_def.13	Gene expression feature, curated for PoPS
human_airway_projected_pcaloadings_clusters_pre_def.14	Gene expression feature, curated for PoPS
human_airway_projected_pcaloadings_clusters_pre_def.15	Gene expression feature, curated for PoPS
human_airway_projected_pcaloadings_clusters_pre_def.16	Gene expression feature, curated for PoPS
human_airway_projected_pcaloadings_clusters_pre_def.17	Gene expression feature, curated for PoPS
human_airway_projected_pcaloadings_clusters_pre_def.18	Gene expression feature, curated for PoPS
human_airway_projected_pcaloadings_clusters_pre_def.19	Gene expression feature, curated for PoPS
human_airway_projected_pcaloadings_clusters_pre_def.20	Gene expression feature, curated for PoPS
human_airway_projected_pcaloadings_clusters_pre_def.21	Gene expression feature, curated for PoPS
human_airway_projected_pcaloadings_clusters_pre_def.22	Gene expression feature, curated for PoPS
human_airway_projected_pcaloadings_clusters_pre_def.23	Gene expression feature, curated for PoPS
human_airway_projected_pcaloadings_clusters_pre_def.24	Gene expression feature, curated for PoPS
human_airway_projected_pcaloadings_clusters_pre_def.25	Gene expression feature, curated for PoPS
human_airway_projected_pcaloadings_clusters_pre_def.26	Gene expression feature, curated for PoPS
human_airway_projected_pcaloadings_clusters_pre_def.27	Gene expression feature, curated for PoPS
human_airway_projected_pcaloadings_clusters_pre_def.28	Gene expression feature, curated for PoPS
human_airway_projected_pcaloadings_clusters_pre_def.29	Gene expression feature, curated for PoPS
human_airway_projected_pcaloadings_clusters_pre_def.30	Gene expression feature, curated for PoPS
human_airway_projected_pcaloadings_clusters_pre_def.31	Gene expression feature, curated for PoPS
human_airway_projected_pcaloadings_clusters_pre_def.32	Gene expression feature, curated for PoPS
human_airway_projected_pcaloadings_clusters_pre_def.33	Gene expression feature, curated for PoPS
human_airway_projected_pcaloadings_clusters_pre_def.34	Gene expression feature, curated for PoPS
human_airway_projected_pcaloadings_clusters_pre_def.35	Gene expression feature, curated for PoPS
human_airway_projected_pcaloadings_clusters_pre_def.36	Gene expression feature, curated for PoPS
human_airway_projected_pcaloadings_clusters_pre_def.37	Gene expression feature, curated for PoPS
human_airway_projected_pcaloadings_clusters_pre_def.38	Gene expression feature, curated for PoPS
human_airway_projected_pcaloadings_clusters_pre_def.39	Gene expression feature, curated for PoPS
human_airway_projected_pcaloadings_clusters_pre_def.40	Gene expression feature, curated for PoPS
human_airway_projected_pcaloadings_clusters_pre_def.41	Gene expression feature, curated for PoPS
human_airway_projected_pcaloadings_clusters_pre_def.42	Gene expression feature, curated for PoPS
human_airway_projected_pcaloadings_clusters_pre_def.43	Gene expression feature, curated for PoPS
human_airway_projected_pcaloadings_clusters_pre_def.44	Gene expression feature, curated for PoPS
human_airway_projected_pcaloadings_clusters_pre_def.45	Gene expression feature, curated for PoPS
human_airway_projected_pcaloadings_clusters_pre_def.46	Gene expression feature, curated for PoPS
human_airway_projected_pcaloadings_clusters_pre_def.47	Gene expression feature, curated for PoPS
human_airway_projected_pcaloadings_clusters_pre_def.48	Gene expression feature, curated for PoPS
human_airway_projected_pcaloadings_clusters_pre_def.49	Gene expression feature, curated for PoPS
human_airway_projected_pcaloadings_clusters_pre_def.50	Gene expression feature, curated for PoPS
human_airway_projected_pcaloadings_clusters_pre_def.51	Gene expression feature, curated for PoPS
human_airway_projected_pcaloadings_clusters_pre_def.52	Gene expression feature, curated for PoPS
human_airway_projected_pcaloadings_clusters_pre_def.53	Gene expression feature, curated for PoPS
human_airway_projected_pcaloadings_clusters_pre_def.54	Gene expression feature, curated for PoPS
human_airway_projected_pcaloadings_clusters_pre_def.55	Gene expression feature, curated for PoPS
human_airway_projected_pcaloadings_clusters_pre_def.56	Gene expression feature, curated for PoPS
human_airway_projected_pcaloadings_clusters_pre_def.57	Gene expression feature, curated for PoPS
human_airway_projected_pcaloadings_clusters_pre_def.58	Gene expression feature, curated for PoPS
human_airway_projected_pcaloadings_clusters_pre_def.59	Gene expression feature, curated for PoPS
human_airway_projected_pcaloadings_clusters_pre_def.60	Gene expression feature, curated for PoPS
human_airway_projected_pcaloadings_clusters_pre_def.61	Gene expression feature, curated for PoPS
human_airway_projected_pcaloadings_clusters_pre_def.62	Gene expression feature, curated for PoPS
human_airway_projected_pcaloadings_clusters_pre_def.63	Gene expression feature, curated for PoPS
human_airway_projected_pcaloadings_clusters_pre_def.64	Gene expression feature, curated for PoPS
human_airway_projected_pcaloadings_clusters_pre_def.65	Gene expression feature, curated for PoPS
human_airway_projected_pcaloadings_clusters_pre_def.66	Gene expression feature, curated for PoPS
human_airway_projected_pcaloadings_clusters_pre_def.67	Gene expression feature, curated for PoPS
human_airway_projected_pcaloadings_clusters_pre_def.68	Gene expression feature, curated for PoPS
human_airway_projected_pcaloadings_clusters_pre_def.69	Gene expression feature, curated for PoPS
human_airway_projected_pcaloadings_clusters_pre_def.70	Gene expression feature, curated for PoPS
human_airway_projected_pcaloadings_clusters_pre_def.71	Gene expression feature, curated for PoPS
human_airway_projected_pcaloadings_clusters_pre_def.72	Gene expression feature, curated for PoPS
human_airway_projected_pcaloadings_clusters_pre_def.73	Gene expression feature, curated for PoPS
human_airway_projected_pcaloadings_clusters_pre_def.74	Gene expression feature, curated for PoPS
human_airway_projected_pcaloadings_clusters_pre_def.75	Gene expression feature, curated for PoPS
human_airway_projected_pcaloadings_clusters_pre_def.76	Gene expression feature, curated for PoPS
human_airway_projected_pcaloadings_clusters_pre_def.77	Gene expression feature, curated for PoPS
human_airway_projected_pcaloadings_clusters_pre_def.78	Gene expression feature, curated for PoPS
human_airway_projected_pcaloadings_clusters_pre_def.79	Gene expression feature, curated for PoPS
human_airway_projected_pcaloadings_clusters_pre_def.80	Gene expression feature, curated for PoPS
human_airway_projected_pcaloadings_clusters_pre_def.81	Gene expression feature, curated for PoPS
human_airway_projected_pcaloadings_clusters_pre_def.82	Gene expression feature, curated for PoPS
human_airway_projected_pcaloadings_clusters_pre_def.83	Gene expression feature, curated for PoPS
human_airway_projected_pcaloadings_clusters_pre_def.84	Gene expression feature, curated for PoPS
human_airway_projected_pcaloadings_clusters_pre_def.85	Gene expression feature, curated for PoPS
human_airway_projected_pcaloadings_clusters_pre_def.86	Gene expression feature, curated for PoPS
human_airway_projected_pcaloadings_clusters_pre_def.87	Gene expression feature, curated for PoPS
human_airway_projected_pcaloadings_clusters_pre_def.88	Gene expression feature, curated for PoPS
human_airway_projected_pcaloadings_clusters_pre_def.89	Gene expression feature, curated for PoPS
human_airway_projected_pcaloadings_clusters_pre_def.90	Gene expression feature, curated for PoPS
human_airway_projected_pcaloadings_clusters_pre_def.91	Gene expression feature, curated for PoPS
human_airway_projected_pcaloadings_clusters_pre_def.92	Gene expression feature, curated for PoPS
human_airway_projected_pcaloadings_clusters_pre_def.93	Gene expression feature, curated for PoPS
human_airway_projected_pcaloadings_clusters_pre_def.94	Gene expression feature, curated for PoPS
human_airway_projected_pcaloadings_clusters_pre_def.95	Gene expression feature, curated for PoPS
human_airway_projected_pcaloadings_clusters_pre_def.96	Gene expression feature, curated for PoPS
human_airway_projected_pcaloadings_clusters_pre_def.97	Gene expression feature, curated for PoPS
human_airway_projected_pcaloadings_clusters_pre_def.98	Gene expression feature, curated for PoPS
human_airway_projected_pcaloadings_clusters_pre_def.99	Gene expression feature, curated for PoPS
human_airway_projected_pcaloadings_clusters_pre_def.100	Gene expression feature, curated for PoPS
human_airway_projected_pcaloadings_clusters_pre_def.101	Gene expression feature, curated for PoPS
human_airway_projected_pcaloadings_clusters_pre_def.102	Gene expression feature, curated for PoPS
human_airway_projected_pcaloadings_clusters_pre_def.103	Gene expression feature, curated for PoPS
human_airway_projected_pcaloadings_clusters_pre_def.104	Gene expression feature, curated for PoPS
human_airway_projected_pcaloadings_clusters_pre_def.105	Gene expression feature, curated for PoPS
human_airway_projected_pcaloadings_clusters_pre_def.106	Gene expression feature, curated for PoPS
human_airway_projected_pcaloadings_clusters_pre_def.107	Gene expression feature, curated for PoPS
human_airway_projected_pcaloadings_clusters_pre_def.108	Gene expression feature, curated for PoPS
human_airway_projected_pcaloadings_clusters_pre_def.109	Gene expression feature, curated for PoPS
human_airway_projected_pcaloadings_clusters_pre_def.110	Gene expression feature, curated for PoPS
human_airway_projected_pcaloadings_clusters_pre_def.111	Gene expression feature, curated for PoPS
human_airway_projected_pcaloadings_clusters_pre_def.112	Gene expression feature, curated for PoPS
human_airway_projected_pcaloadings_clusters_pre_def.113	Gene expression feature, curated for PoPS
human_airway_projected_pcaloadings_clusters_pre_def.114	Gene expression feature, curated for PoPS
human_airway_projected_pcaloadings_clusters_pre_def.115	Gene expression feature, curated for PoPS
human_airway_projected_pcaloadings_clusters_pre_def.116	Gene expression feature, curated for PoPS
human_airway_projected_pcaloadings_clusters_pre_def.117	Gene expression feature, curated for PoPS
human_airway_projected_pcaloadings_clusters_pre_def.118	Gene expression feature, curated for PoPS
human_airway_projected_pcaloadings_clusters_pre_def.119	Gene expression feature, curated for PoPS
human_airway_projected_pcaloadings_clusters_pre_def.120	Gene expression feature, curated for PoPS
human_airway_projected_pcaloadings_clusters_pre_def.121	Gene expression feature, curated for PoPS
human_airway_projected_pcaloadings_clusters_pre_def.122	Gene expression feature, curated for PoPS
human_airway_projected_pcaloadings_clusters_pre_def.123	Gene expression feature, curated for PoPS
human_airway_projected_pcaloadings_clusters_pre_def.124	Gene expression feature, curated for PoPS
human_airway_projected_pcaloadings_clusters_pre_def.125	Gene expression feature, curated for PoPS
human_airway_projected_pcaloadings_clusters_pre_def.126	Gene expression feature, curated for PoPS
human_airway_projected_pcaloadings_clusters_pre_def.127	Gene expression feature, curated for PoPS
human_airway_projected_pcaloadings_clusters_pre_def.128	Gene expression feature, curated for PoPS
human_airway_projected_pcaloadings_clusters_pre_def.129	Gene expression feature, curated for PoPS
human_airway_projected_pcaloadings_clusters_pre_def.130	Gene expression feature, curated for PoPS
human_airway_projected_pcaloadings_clusters_pre_def.131	Gene expression feature, curated for PoPS
human_airway_projected_pcaloadings_clusters_pre_def.132	Gene expression feature, curated for PoPS
human_airway_projected_pcaloadings_clusters_pre_def.133	Gene expression feature, curated for PoPS
human_airway_projected_pcaloadings_clusters_pre_def.134	Gene expression feature, curated for PoPS
human_airway_projected_pcaloadings_clusters_pre_def.135	Gene expression feature, curated for PoPS
human_airway_projected_pcaloadings_clusters_pre_def.136	Gene expression feature, curated for PoPS
human_airway_projected_pcaloadings_clusters_pre_def.137	Gene expression feature, curated for PoPS
human_airway_projected_pcaloadings_clusters_pre_def.138	Gene expression feature, curated for PoPS
human_airway_projected_pcaloadings_clusters_pre_def.139	Gene expression feature, curated for PoPS
human_airway_projected_pcaloadings_clusters_pre_def.140	Gene expression feature, curated for PoPS
human_airway_projected_pcaloadings_clusters_pre_def.141	Gene expression feature, curated for PoPS
human_airway_projected_pcaloadings_clusters_pre_def.142	Gene expression feature, curated for PoPS
human_airway_projected_pcaloadings_clusters_pre_def.143	Gene expression feature, curated for PoPS
human_airway_projected_pcaloadings_clusters_pre_def.144	Gene expression feature, curated for PoPS
human_airway_projected_pcaloadings_clusters_pre_def.145	Gene expression feature, curated for PoPS
human_airway_projected_pcaloadings_clusters_pre_def.146	Gene expression feature, curated for PoPS
human_airway_projected_pcaloadings_clusters_pre_def.147	Gene expression feature, curated for PoPS
human_airway_projected_pcaloadings_clusters_pre_def.148	Gene expression feature, curated for PoPS
human_airway_projected_pcaloadings_clusters_pre_def.149	Gene expression feature, curated for PoPS
human_airway_projected_pcaloadings_clusters_pre_def.150	Gene expression feature, curated for PoPS
human_airway_projected_pcaloadings_clusters_pre_def.151	Gene expression feature, curated for PoPS
human_airway_projected_pcaloadings_clusters_pre_def.152	Gene expression feature, curated for PoPS
human_airway_projected_pcaloadings_clusters_pre_def.153	Gene expression feature, curated for PoPS
human_airway_projected_pcaloadings_clusters_pre_def.154	Gene expression feature, curated for PoPS
human_airway_projected_pcaloadings_clusters_pre_def.155	Gene expression feature, curated for PoPS
human_airway_projected_pcaloadings_clusters_pre_def.156	Gene expression feature, curated for PoPS
human_airway_projected_pcaloadings_clusters_pre_def.157	Gene expression feature, curated for PoPS
human_airway_projected_pcaloadings_clusters_pre_def.158	Gene expression feature, curated for PoPS
human_airway_projected_pcaloadings_clusters_pre_def.159	Gene expression feature, curated for PoPS
human_airway_projected_pcaloadings_clusters_pre_def.160	Gene expression feature, curated for PoPS
human_airway_projected_pcaloadings_clusters_pre_def.161	Gene expression feature, curated for PoPS
human_airway_projected_pcaloadings_clusters_pre_def.162	Gene expression feature, curated for PoPS
human_airway_projected_pcaloadings_clusters_pre_def.163	Gene expression feature, curated for PoPS
human_airway_projected_pcaloadings_clusters_pre_def.164	Gene expression feature, curated for PoPS
human_airway_projected_pcaloadings_clusters_pre_def.165	Gene expression feature, curated for PoPS
human_airway_projected_pcaloadings_clusters_pre_def.166	Gene expression feature, curated for PoPS
human_airway_projected_pcaloadings_clusters_pre_def.167	Gene expression feature, curated for PoPS
human_airway_projected_pcaloadings_clusters_pre_def.168	Gene expression feature, curated for PoPS
human_airway_projected_pcaloadings_clusters_pre_def.169	Gene expression feature, curated for PoPS
human_airway_projected_pcaloadings_clusters_pre_def.170	Gene expression feature, curated for PoPS
human_airway_projected_pcaloadings_clusters_pre_def.171	Gene expression feature, curated for PoPS
human_airway_projected_pcaloadings_clusters_pre_def.172	Gene expression feature, curated for PoPS
human_airway_projected_pcaloadings_clusters_pre_def.173	Gene expression feature, curated for PoPS
human_airway_projected_pcaloadings_clusters_pre_def.174	Gene expression feature, curated for PoPS
human_airway_projected_pcaloadings_clusters_pre_def.175	Gene expression feature, curated for PoPS
human_airway_projected_pcaloadings_clusters_pre_def.176	Gene expression feature, curated for PoPS
human_airway_projected_pcaloadings_clusters_pre_def.177	Gene expression feature, curated for PoPS
human_airway_projected_pcaloadings_clusters_pre_def.178	Gene expression feature, curated for PoPS
human_airway_projected_pcaloadings_clusters_pre_def.179	Gene expression feature, curated for PoPS
human_airway_projected_pcaloadings_clusters_pre_def.180	Gene expression feature, curated for PoPS
human_airway_projected_pcaloadings_clusters_pre_def.181	Gene expression feature, curated for PoPS
human_airway_projected_pcaloadings_clusters_pre_def.182	Gene expression feature, curated for PoPS
human_airway_projected_pcaloadings_clusters_pre_def.183	Gene expression feature, curated for PoPS
human_airway_projected_pcaloadings_clusters_pre_def.184	Gene expression feature, curated for PoPS
human_airway_projected_pcaloadings_clusters_pre_def.185	Gene expression feature, curated for PoPS
human_airway_projected_pcaloadings_clusters_pre_def.186	Gene expression feature, curated for PoPS
human_airway_projected_pcaloadings_clusters_pre_def.187	Gene expression feature, curated for PoPS
human_airway_projected_pcaloadings_clusters_pre_def.188	Gene expression feature, curated for PoPS
human_airway_projected_pcaloadings_clusters_pre_def.189	Gene expression feature, curated for PoPS
human_airway_projected_pcaloadings_clusters_pre_def.190	Gene expression feature, curated for PoPS
human_airway_projected_pcaloadings_clusters_pre_def.191	Gene expression feature, curated for PoPS
human_airway_projected_pcaloadings_clusters_pre_def.192	Gene expression feature, curated for PoPS
human_airway_projected_pcaloadings_clusters_pre_def.193	Gene expression feature, curated for PoPS
human_airway_projected_pcaloadings_clusters_pre_def.194	Gene expression feature, curated for PoPS
human_airway_projected_pcaloadings_clusters_pre_def.195	Gene expression feature, curated for PoPS
human_airway_projected_pcaloadings_clusters_pre_def.196	Gene expression feature, curated for PoPS
human_airway_projected_pcaloadings_clusters_pre_def.197	Gene expression feature, curated for PoPS
human_airway_projected_pcaloadings_clusters_pre_def.198	Gene expression feature, curated for PoPS
human_airway_projected_pcaloadings_clusters_pre_def.199	Gene expression feature, curated for PoPS
human_airway_projected_pcaloadings_clusters_pre_def.200	Gene expression feature, curated for PoPS
human_airway_projected_pcaloadings_clusters_pre_def.201	Gene expression feature, curated for PoPS
human_airway_projected_pcaloadings_clusters_pre_def.202	Gene expression feature, curated for PoPS
human_airway_projected_pcaloadings_clusters_pre_def.203	Gene expression feature, curated for PoPS
human_airway_projected_pcaloadings_clusters_pre_def.204	Gene expression feature, curated for PoPS
human_airway_projected_pcaloadings_clusters_pre_def.205	Gene expression feature, curated for PoPS
human_airway_projected_pcaloadings_clusters_pre_def.206	Gene expression feature, curated for PoPS
human_airway_projected_pcaloadings_clusters_pre_def.207	Gene expression feature, curated for PoPS
human_airway_projected_pcaloadings_clusters_pre_def.208	Gene expression feature, curated for PoPS
human_airway_projected_pcaloadings_clusters_pre_def.209	Gene expression feature, curated for PoPS
human_airway_projected_pcaloadings_clusters_pre_def.210	Gene expression feature, curated for PoPS
human_prostate_average_expression.1	Gene expression feature, curated for PoPS
human_prostate_average_expression.2	Gene expression feature, curated for PoPS
human_prostate_average_expression.3	Gene expression feature, curated for PoPS
human_prostate_average_expression.4	Gene expression feature, curated for PoPS
human_prostate_average_expression.5	Gene expression feature, curated for PoPS
human_prostate_average_expression.6	Gene expression feature, curated for PoPS
human_prostate_average_expression.7	Gene expression feature, curated for PoPS
human_prostate_average_expression.8	Gene expression feature, curated for PoPS
human_prostate_average_expression.9	Gene expression feature, curated for PoPS
human_prostate_average_expression.10	Gene expression feature, curated for PoPS
human_prostate_average_expression.11	Gene expression feature, curated for PoPS
human_prostate_average_expression.12	Gene expression feature, curated for PoPS
human_prostate_average_expression.13	Gene expression feature, curated for PoPS
human_prostate_average_expression.14	Gene expression feature, curated for PoPS
human_prostate_average_expression.15	Gene expression feature, curated for PoPS
human_prostate_average_expression.16	Gene expression feature, curated for PoPS
human_prostate_diffexprs_down_genes_clusters.1	Gene expression feature, curated for PoPS
human_prostate_diffexprs_down_genes_clusters.2	Gene expression feature, curated for PoPS
human_prostate_diffexprs_down_genes_clusters.3	Gene expression feature, curated for PoPS
human_prostate_diffexprs_down_genes_clusters.4	Gene expression feature, curated for PoPS
human_prostate_diffexprs_down_genes_clusters.5	Gene expression feature, curated for PoPS
human_prostate_diffexprs_down_genes_clusters.6	Gene expression feature, curated for PoPS
human_prostate_diffexprs_down_genes_clusters.7	Gene expression feature, curated for PoPS
human_prostate_diffexprs_down_genes_clusters.8	Gene expression feature, curated for PoPS
human_prostate_diffexprs_down_genes_clusters.9	Gene expression feature, curated for PoPS
human_prostate_diffexprs_down_genes_clusters.10	Gene expression feature, curated for PoPS
human_prostate_diffexprs_down_genes_clusters.11	Gene expression feature, curated for PoPS
human_prostate_diffexprs_down_genes_clusters.12	Gene expression feature, curated for PoPS
human_prostate_diffexprs_down_genes_clusters.13	Gene expression feature, curated for PoPS
human_prostate_diffexprs_down_genes_clusters.14	Gene expression feature, curated for PoPS
human_prostate_diffexprs_down_genes_clusters.15	Gene expression feature, curated for PoPS
human_prostate_diffexprs_genes_clusters.1	Gene expression feature, curated for PoPS
human_prostate_diffexprs_genes_clusters.2	Gene expression feature, curated for PoPS
human_prostate_diffexprs_genes_clusters.3	Gene expression feature, curated for PoPS
human_prostate_diffexprs_genes_clusters.4	Gene expression feature, curated for PoPS
human_prostate_diffexprs_genes_clusters.5	Gene expression feature, curated for PoPS
human_prostate_diffexprs_genes_clusters.6	Gene expression feature, curated for PoPS
human_prostate_diffexprs_genes_clusters.7	Gene expression feature, curated for PoPS
human_prostate_diffexprs_genes_clusters.8	Gene expression feature, curated for PoPS
human_prostate_diffexprs_genes_clusters.9	Gene expression feature, curated for PoPS
human_prostate_diffexprs_genes_clusters.10	Gene expression feature, curated for PoPS
human_prostate_diffexprs_genes_clusters.11	Gene expression feature, curated for PoPS
human_prostate_diffexprs_genes_clusters.12	Gene expression feature, curated for PoPS
human_prostate_diffexprs_genes_clusters.13	Gene expression feature, curated for PoPS
human_prostate_diffexprs_genes_clusters.14	Gene expression feature, curated for PoPS
human_prostate_diffexprs_genes_clusters.15	Gene expression feature, curated for PoPS
human_prostate_diffexprs_tstat_clusters.1	Gene expression feature, curated for PoPS
human_prostate_diffexprs_tstat_clusters.2	Gene expression feature, curated for PoPS
human_prostate_diffexprs_tstat_clusters.3	Gene expression feature, curated for PoPS
human_prostate_diffexprs_tstat_clusters.4	Gene expression feature, curated for PoPS
human_prostate_diffexprs_tstat_clusters.5	Gene expression feature, curated for PoPS
human_prostate_diffexprs_tstat_clusters.6	Gene expression feature, curated for PoPS
human_prostate_diffexprs_tstat_clusters.7	Gene expression feature, curated for PoPS
human_prostate_diffexprs_tstat_clusters.8	Gene expression feature, curated for PoPS
human_prostate_diffexprs_tstat_clusters.9	Gene expression feature, curated for PoPS
human_prostate_diffexprs_tstat_clusters.10	Gene expression feature, curated for PoPS
human_prostate_diffexprs_tstat_clusters.11	Gene expression feature, curated for PoPS
human_prostate_diffexprs_tstat_clusters.12	Gene expression feature, curated for PoPS
human_prostate_diffexprs_tstat_clusters.13	Gene expression feature, curated for PoPS
human_prostate_diffexprs_tstat_clusters.14	Gene expression feature, curated for PoPS
human_prostate_diffexprs_tstat_clusters.15	Gene expression feature, curated for PoPS
human_prostate_projected_icaloadings.1	Gene expression feature, curated for PoPS
human_prostate_projected_icaloadings.2	Gene expression feature, curated for PoPS
human_prostate_projected_icaloadings.3	Gene expression feature, curated for PoPS
human_prostate_projected_icaloadings.4	Gene expression feature, curated for PoPS
human_prostate_projected_icaloadings.5	Gene expression feature, curated for PoPS
human_prostate_projected_icaloadings.6	Gene expression feature, curated for PoPS
human_prostate_projected_icaloadings.7	Gene expression feature, curated for PoPS
human_prostate_projected_icaloadings.8	Gene expression feature, curated for PoPS
human_prostate_projected_icaloadings.9	Gene expression feature, curated for PoPS
human_prostate_projected_icaloadings.10	Gene expression feature, curated for PoPS
human_prostate_projected_icaloadings.11	Gene expression feature, curated for PoPS
human_prostate_projected_icaloadings.12	Gene expression feature, curated for PoPS
human_prostate_projected_icaloadings.13	Gene expression feature, curated for PoPS
human_prostate_projected_icaloadings.14	Gene expression feature, curated for PoPS
human_prostate_projected_icaloadings.15	Gene expression feature, curated for PoPS
human_prostate_projected_icaloadings.16	Gene expression feature, curated for PoPS
human_prostate_projected_icaloadings.17	Gene expression feature, curated for PoPS
human_prostate_projected_icaloadings.18	Gene expression feature, curated for PoPS
human_prostate_projected_icaloadings.19	Gene expression feature, curated for PoPS
human_prostate_projected_icaloadings.20	Gene expression feature, curated for PoPS
human_prostate_projected_icaloadings.21	Gene expression feature, curated for PoPS
human_prostate_projected_icaloadings.22	Gene expression feature, curated for PoPS
human_prostate_projected_icaloadings.23	Gene expression feature, curated for PoPS
human_prostate_projected_icaloadings.24	Gene expression feature, curated for PoPS
human_prostate_projected_icaloadings.25	Gene expression feature, curated for PoPS
human_prostate_projected_icaloadings.26	Gene expression feature, curated for PoPS
human_prostate_projected_icaloadings.27	Gene expression feature, curated for PoPS
human_prostate_projected_icaloadings.28	Gene expression feature, curated for PoPS
human_prostate_projected_icaloadings.29	Gene expression feature, curated for PoPS
human_prostate_projected_icaloadings.30	Gene expression feature, curated for PoPS
human_prostate_projected_icaloadings.31	Gene expression feature, curated for PoPS
human_prostate_projected_icaloadings.32	Gene expression feature, curated for PoPS
human_prostate_projected_icaloadings.33	Gene expression feature, curated for PoPS
human_prostate_projected_icaloadings.34	Gene expression feature, curated for PoPS
human_prostate_projected_icaloadings.35	Gene expression feature, curated for PoPS
human_prostate_projected_icaloadings.36	Gene expression feature, curated for PoPS
human_prostate_projected_icaloadings.37	Gene expression feature, curated for PoPS
human_prostate_projected_icaloadings.38	Gene expression feature, curated for PoPS
human_prostate_projected_icaloadings.39	Gene expression feature, curated for PoPS
human_prostate_projected_icaloadings.40	Gene expression feature, curated for PoPS
human_prostate_projected_icaloadings.41	Gene expression feature, curated for PoPS
human_prostate_projected_icaloadings.42	Gene expression feature, curated for PoPS
human_prostate_projected_icaloadings.43	Gene expression feature, curated for PoPS
human_prostate_projected_icaloadings.44	Gene expression feature, curated for PoPS
human_prostate_projected_icaloadings.45	Gene expression feature, curated for PoPS
human_prostate_projected_icaloadings.46	Gene expression feature, curated for PoPS
human_prostate_projected_icaloadings.47	Gene expression feature, curated for PoPS
human_prostate_projected_icaloadings.48	Gene expression feature, curated for PoPS
human_prostate_projected_icaloadings.49	Gene expression feature, curated for PoPS
human_prostate_projected_icaloadings.50	Gene expression feature, curated for PoPS
human_prostate_projected_pcaloadings.1	Gene expression feature, curated for PoPS
human_prostate_projected_pcaloadings.2	Gene expression feature, curated for PoPS
human_prostate_projected_pcaloadings.3	Gene expression feature, curated for PoPS
human_prostate_projected_pcaloadings.4	Gene expression feature, curated for PoPS
human_prostate_projected_pcaloadings.5	Gene expression feature, curated for PoPS
human_prostate_projected_pcaloadings.6	Gene expression feature, curated for PoPS
human_prostate_projected_pcaloadings.7	Gene expression feature, curated for PoPS
human_prostate_projected_pcaloadings.8	Gene expression feature, curated for PoPS
human_prostate_projected_pcaloadings.9	Gene expression feature, curated for PoPS
human_prostate_projected_pcaloadings.10	Gene expression feature, curated for PoPS
human_prostate_projected_pcaloadings.11	Gene expression feature, curated for PoPS
human_prostate_projected_pcaloadings.12	Gene expression feature, curated for PoPS
human_prostate_projected_pcaloadings.13	Gene expression feature, curated for PoPS
human_prostate_projected_pcaloadings.14	Gene expression feature, curated for PoPS
human_prostate_projected_pcaloadings.15	Gene expression feature, curated for PoPS
human_prostate_projected_pcaloadings.16	Gene expression feature, curated for PoPS
human_prostate_projected_pcaloadings.17	Gene expression feature, curated for PoPS
human_prostate_projected_pcaloadings.18	Gene expression feature, curated for PoPS
human_prostate_projected_pcaloadings.19	Gene expression feature, curated for PoPS
human_prostate_projected_pcaloadings.20	Gene expression feature, curated for PoPS
human_prostate_projected_pcaloadings.21	Gene expression feature, curated for PoPS
human_prostate_projected_pcaloadings.22	Gene expression feature, curated for PoPS
human_prostate_projected_pcaloadings.23	Gene expression feature, curated for PoPS
human_prostate_projected_pcaloadings.24	Gene expression feature, curated for PoPS
human_prostate_projected_pcaloadings.25	Gene expression feature, curated for PoPS
human_prostate_projected_pcaloadings.26	Gene expression feature, curated for PoPS
human_prostate_projected_pcaloadings.27	Gene expression feature, curated for PoPS
human_prostate_projected_pcaloadings.28	Gene expression feature, curated for PoPS
human_prostate_projected_pcaloadings.29	Gene expression feature, curated for PoPS
human_prostate_projected_pcaloadings.30	Gene expression feature, curated for PoPS
human_prostate_projected_pcaloadings.31	Gene expression feature, curated for PoPS
human_prostate_projected_pcaloadings.32	Gene expression feature, curated for PoPS
human_prostate_projected_pcaloadings.33	Gene expression feature, curated for PoPS
human_prostate_projected_pcaloadings.34	Gene expression feature, curated for PoPS
human_prostate_projected_pcaloadings.35	Gene expression feature, curated for PoPS
human_prostate_projected_pcaloadings.36	Gene expression feature, curated for PoPS
human_prostate_projected_pcaloadings.37	Gene expression feature, curated for PoPS
human_prostate_projected_pcaloadings.38	Gene expression feature, curated for PoPS
human_prostate_projected_pcaloadings.39	Gene expression feature, curated for PoPS
human_prostate_projected_pcaloadings.40	Gene expression feature, curated for PoPS
human_prostate_projected_pcaloadings.41	Gene expression feature, curated for PoPS
human_prostate_projected_pcaloadings.42	Gene expression feature, curated for PoPS
human_prostate_projected_pcaloadings.43	Gene expression feature, curated for PoPS
human_prostate_projected_pcaloadings.44	Gene expression feature, curated for PoPS
human_prostate_projected_pcaloadings.45	Gene expression feature, curated for PoPS
human_prostate_projected_pcaloadings.46	Gene expression feature, curated for PoPS
human_prostate_projected_pcaloadings.47	Gene expression feature, curated for PoPS
human_prostate_projected_pcaloadings.48	Gene expression feature, curated for PoPS
human_prostate_projected_pcaloadings.49	Gene expression feature, curated for PoPS
human_prostate_projected_pcaloadings.50	Gene expression feature, curated for PoPS
human_prostate_projected_pcaloadings.51	Gene expression feature, curated for PoPS
human_prostate_projected_pcaloadings.52	Gene expression feature, curated for PoPS
human_prostate_projected_pcaloadings.53	Gene expression feature, curated for PoPS
human_prostate_projected_pcaloadings.54	Gene expression feature, curated for PoPS
human_prostate_projected_pcaloadings.55	Gene expression feature, curated for PoPS
human_prostate_projected_pcaloadings.56	Gene expression feature, curated for PoPS
human_prostate_projected_pcaloadings.57	Gene expression feature, curated for PoPS
human_prostate_projected_pcaloadings.58	Gene expression feature, curated for PoPS
human_prostate_projected_pcaloadings.59	Gene expression feature, curated for PoPS
human_prostate_projected_pcaloadings.60	Gene expression feature, curated for PoPS
human_prostate_projected_pcaloadings.61	Gene expression feature, curated for PoPS
human_prostate_projected_pcaloadings.62	Gene expression feature, curated for PoPS
human_prostate_projected_pcaloadings.63	Gene expression feature, curated for PoPS
human_prostate_projected_pcaloadings.64	Gene expression feature, curated for PoPS
human_prostate_projected_pcaloadings.65	Gene expression feature, curated for PoPS
human_prostate_projected_pcaloadings.66	Gene expression feature, curated for PoPS
human_prostate_projected_pcaloadings.67	Gene expression feature, curated for PoPS
human_prostate_projected_pcaloadings.68	Gene expression feature, curated for PoPS
human_prostate_projected_pcaloadings.69	Gene expression feature, curated for PoPS
human_prostate_projected_pcaloadings.70	Gene expression feature, curated for PoPS
human_prostate_projected_pcaloadings.71	Gene expression feature, curated for PoPS
human_prostate_projected_pcaloadings.72	Gene expression feature, curated for PoPS
human_prostate_projected_pcaloadings.73	Gene expression feature, curated for PoPS
human_prostate_projected_pcaloadings.74	Gene expression feature, curated for PoPS
human_prostate_projected_pcaloadings.75	Gene expression feature, curated for PoPS
human_prostate_projected_pcaloadings.76	Gene expression feature, curated for PoPS
human_prostate_projected_pcaloadings.77	Gene expression feature, curated for PoPS
human_prostate_projected_pcaloadings.78	Gene expression feature, curated for PoPS
human_prostate_projected_pcaloadings.79	Gene expression feature, curated for PoPS
human_prostate_projected_pcaloadings.80	Gene expression feature, curated for PoPS
human_prostate_projected_pcaloadings.81	Gene expression feature, curated for PoPS
human_prostate_projected_pcaloadings.82	Gene expression feature, curated for PoPS
human_prostate_projected_pcaloadings.83	Gene expression feature, curated for PoPS
human_prostate_projected_pcaloadings.84	Gene expression feature, curated for PoPS
human_prostate_projected_pcaloadings.85	Gene expression feature, curated for PoPS
human_prostate_projected_pcaloadings.86	Gene expression feature, curated for PoPS
human_prostate_projected_pcaloadings.87	Gene expression feature, curated for PoPS
human_prostate_projected_pcaloadings.88	Gene expression feature, curated for PoPS
human_prostate_projected_pcaloadings.89	Gene expression feature, curated for PoPS
human_prostate_projected_pcaloadings.90	Gene expression feature, curated for PoPS
human_prostate_projected_pcaloadings.91	Gene expression feature, curated for PoPS
human_prostate_projected_pcaloadings.92	Gene expression feature, curated for PoPS
human_prostate_projected_pcaloadings.93	Gene expression feature, curated for PoPS
human_prostate_projected_pcaloadings.94	Gene expression feature, curated for PoPS
human_prostate_projected_pcaloadings.95	Gene expression feature, curated for PoPS
human_prostate_projected_pcaloadings.96	Gene expression feature, curated for PoPS
human_prostate_projected_pcaloadings.97	Gene expression feature, curated for PoPS
human_prostate_projected_pcaloadings.98	Gene expression feature, curated for PoPS
human_prostate_projected_pcaloadings.99	Gene expression feature, curated for PoPS
human_prostate_projected_pcaloadings.100	Gene expression feature, curated for PoPS
human_prostate_projected_pcaloadings_clusters.1	Gene expression feature, curated for PoPS
human_prostate_projected_pcaloadings_clusters.2	Gene expression feature, curated for PoPS
human_prostate_projected_pcaloadings_clusters.3	Gene expression feature, curated for PoPS
human_prostate_projected_pcaloadings_clusters.4	Gene expression feature, curated for PoPS
human_prostate_projected_pcaloadings_clusters.5	Gene expression feature, curated for PoPS
human_prostate_projected_pcaloadings_clusters.6	Gene expression feature, curated for PoPS
human_prostate_projected_pcaloadings_clusters.7	Gene expression feature, curated for PoPS
human_prostate_projected_pcaloadings_clusters.8	Gene expression feature, curated for PoPS
human_prostate_projected_pcaloadings_clusters.9	Gene expression feature, curated for PoPS
human_prostate_projected_pcaloadings_clusters.10	Gene expression feature, curated for PoPS
human_prostate_projected_pcaloadings_clusters.11	Gene expression feature, curated for PoPS
human_prostate_projected_pcaloadings_clusters.12	Gene expression feature, curated for PoPS
human_prostate_projected_pcaloadings_clusters.13	Gene expression feature, curated for PoPS
human_prostate_projected_pcaloadings_clusters.14	Gene expression feature, curated for PoPS
human_prostate_projected_pcaloadings_clusters.15	Gene expression feature, curated for PoPS
human_prostate_projected_pcaloadings_clusters.16	Gene expression feature, curated for PoPS
human_prostate_projected_pcaloadings_clusters.17	Gene expression feature, curated for PoPS
human_prostate_projected_pcaloadings_clusters.18	Gene expression feature, curated for PoPS
human_prostate_projected_pcaloadings_clusters.19	Gene expression feature, curated for PoPS
human_prostate_projected_pcaloadings_clusters.20	Gene expression feature, curated for PoPS
human_prostate_projected_pcaloadings_clusters.21	Gene expression feature, curated for PoPS
human_prostate_projected_pcaloadings_clusters.22	Gene expression feature, curated for PoPS
human_prostate_projected_pcaloadings_clusters.23	Gene expression feature, curated for PoPS
human_prostate_projected_pcaloadings_clusters.24	Gene expression feature, curated for PoPS
human_prostate_projected_pcaloadings_clusters.25	Gene expression feature, curated for PoPS
human_prostate_projected_pcaloadings_clusters.26	Gene expression feature, curated for PoPS
human_prostate_projected_pcaloadings_clusters.27	Gene expression feature, curated for PoPS
human_prostate_projected_pcaloadings_clusters.28	Gene expression feature, curated for PoPS
human_prostate_projected_pcaloadings_clusters.29	Gene expression feature, curated for PoPS
human_prostate_projected_pcaloadings_clusters.30	Gene expression feature, curated for PoPS
human_prostate_projected_pcaloadings_clusters.31	Gene expression feature, curated for PoPS
human_prostate_projected_pcaloadings_clusters.32	Gene expression feature, curated for PoPS
human_prostate_projected_pcaloadings_clusters.33	Gene expression feature, curated for PoPS
human_prostate_projected_pcaloadings_clusters.34	Gene expression feature, curated for PoPS
human_prostate_projected_pcaloadings_clusters.35	Gene expression feature, curated for PoPS
human_prostate_projected_pcaloadings_clusters.36	Gene expression feature, curated for PoPS
human_prostate_projected_pcaloadings_clusters.37	Gene expression feature, curated for PoPS
human_prostate_projected_pcaloadings_clusters.38	Gene expression feature, curated for PoPS
human_prostate_projected_pcaloadings_clusters.39	Gene expression feature, curated for PoPS
human_prostate_projected_pcaloadings_clusters.40	Gene expression feature, curated for PoPS
human_prostate_projected_pcaloadings_clusters.41	Gene expression feature, curated for PoPS
human_prostate_projected_pcaloadings_clusters.42	Gene expression feature, curated for PoPS
human_prostate_projected_pcaloadings_clusters.43	Gene expression feature, curated for PoPS
human_prostate_projected_pcaloadings_clusters.44	Gene expression feature, curated for PoPS
human_prostate_projected_pcaloadings_clusters.45	Gene expression feature, curated for PoPS
human_prostate_projected_pcaloadings_clusters.46	Gene expression feature, curated for PoPS
human_prostate_projected_pcaloadings_clusters.47	Gene expression feature, curated for PoPS
human_prostate_projected_pcaloadings_clusters.48	Gene expression feature, curated for PoPS
human_prostate_projected_pcaloadings_clusters.49	Gene expression feature, curated for PoPS
human_prostate_projected_pcaloadings_clusters.50	Gene expression feature, curated for PoPS
human_prostate_projected_pcaloadings_clusters.51	Gene expression feature, curated for PoPS
human_prostate_projected_pcaloadings_clusters.52	Gene expression feature, curated for PoPS
human_prostate_projected_pcaloadings_clusters.53	Gene expression feature, curated for PoPS
human_prostate_projected_pcaloadings_clusters.54	Gene expression feature, curated for PoPS
human_prostate_projected_pcaloadings_clusters.55	Gene expression feature, curated for PoPS
human_prostate_projected_pcaloadings_clusters.56	Gene expression feature, curated for PoPS
human_prostate_projected_pcaloadings_clusters.57	Gene expression feature, curated for PoPS
human_prostate_projected_pcaloadings_clusters.58	Gene expression feature, curated for PoPS
human_prostate_projected_pcaloadings_clusters.59	Gene expression feature, curated for PoPS
human_prostate_projected_pcaloadings_clusters.60	Gene expression feature, curated for PoPS
human_prostate_projected_pcaloadings_clusters.61	Gene expression feature, curated for PoPS
human_prostate_projected_pcaloadings_clusters.62	Gene expression feature, curated for PoPS
human_prostate_projected_pcaloadings_clusters.63	Gene expression feature, curated for PoPS
human_prostate_projected_pcaloadings_clusters.64	Gene expression feature, curated for PoPS
human_prostate_projected_pcaloadings_clusters.65	Gene expression feature, curated for PoPS
human_prostate_projected_pcaloadings_clusters.66	Gene expression feature, curated for PoPS
human_prostate_projected_pcaloadings_clusters.67	Gene expression feature, curated for PoPS
human_prostate_projected_pcaloadings_clusters.68	Gene expression feature, curated for PoPS
human_prostate_projected_pcaloadings_clusters.69	Gene expression feature, curated for PoPS
human_prostate_projected_pcaloadings_clusters.70	Gene expression feature, curated for PoPS
human_prostate_projected_pcaloadings_clusters.71	Gene expression feature, curated for PoPS
human_prostate_projected_pcaloadings_clusters.72	Gene expression feature, curated for PoPS
human_prostate_projected_pcaloadings_clusters.73	Gene expression feature, curated for PoPS
human_prostate_projected_pcaloadings_clusters.74	Gene expression feature, curated for PoPS
human_prostate_projected_pcaloadings_clusters.75	Gene expression feature, curated for PoPS
human_prostate_projected_pcaloadings_clusters.76	Gene expression feature, curated for PoPS
human_prostate_projected_pcaloadings_clusters.77	Gene expression feature, curated for PoPS
human_prostate_projected_pcaloadings_clusters.78	Gene expression feature, curated for PoPS
human_prostate_projected_pcaloadings_clusters.79	Gene expression feature, curated for PoPS
human_prostate_projected_pcaloadings_clusters.80	Gene expression feature, curated for PoPS
human_prostate_projected_pcaloadings_clusters.81	Gene expression feature, curated for PoPS
human_prostate_projected_pcaloadings_clusters.82	Gene expression feature, curated for PoPS
human_prostate_projected_pcaloadings_clusters.83	Gene expression feature, curated for PoPS
human_prostate_projected_pcaloadings_clusters.84	Gene expression feature, curated for PoPS
human_prostate_projected_pcaloadings_clusters.85	Gene expression feature, curated for PoPS
human_prostate_projected_pcaloadings_clusters.86	Gene expression feature, curated for PoPS
human_prostate_projected_pcaloadings_clusters.87	Gene expression feature, curated for PoPS
human_prostate_projected_pcaloadings_clusters.88	Gene expression feature, curated for PoPS
human_prostate_projected_pcaloadings_clusters.89	Gene expression feature, curated for PoPS
human_prostate_projected_pcaloadings_clusters.90	Gene expression feature, curated for PoPS
human_prostate_projected_pcaloadings_clusters.91	Gene expression feature, curated for PoPS
human_prostate_projected_pcaloadings_clusters.92	Gene expression feature, curated for PoPS
human_prostate_projected_pcaloadings_clusters.93	Gene expression feature, curated for PoPS
human_prostate_projected_pcaloadings_clusters.94	Gene expression feature, curated for PoPS
human_prostate_projected_pcaloadings_clusters.95	Gene expression feature, curated for PoPS
human_prostate_projected_pcaloadings_clusters.96	Gene expression feature, curated for PoPS
human_prostate_projected_pcaloadings_clusters.97	Gene expression feature, curated for PoPS
human_prostate_projected_pcaloadings_clusters.98	Gene expression feature, curated for PoPS
human_prostate_projected_pcaloadings_clusters.99	Gene expression feature, curated for PoPS
human_prostate_projected_pcaloadings_clusters.100	Gene expression feature, curated for PoPS
human_prostate_projected_pcaloadings_clusters.101	Gene expression feature, curated for PoPS
human_prostate_projected_pcaloadings_clusters.102	Gene expression feature, curated for PoPS
human_prostate_projected_pcaloadings_clusters.103	Gene expression feature, curated for PoPS
human_prostate_projected_pcaloadings_clusters.104	Gene expression feature, curated for PoPS
human_prostate_projected_pcaloadings_clusters.105	Gene expression feature, curated for PoPS
human_prostate_projected_pcaloadings_clusters.106	Gene expression feature, curated for PoPS
human_prostate_projected_pcaloadings_clusters.107	Gene expression feature, curated for PoPS
human_prostate_projected_pcaloadings_clusters.108	Gene expression feature, curated for PoPS
human_prostate_projected_pcaloadings_clusters.109	Gene expression feature, curated for PoPS
human_prostate_projected_pcaloadings_clusters.110	Gene expression feature, curated for PoPS
human_prostate_projected_pcaloadings_clusters.111	Gene expression feature, curated for PoPS
human_prostate_projected_pcaloadings_clusters.112	Gene expression feature, curated for PoPS
human_prostate_projected_pcaloadings_clusters.113	Gene expression feature, curated for PoPS
human_prostate_projected_pcaloadings_clusters.114	Gene expression feature, curated for PoPS
human_prostate_projected_pcaloadings_clusters.115	Gene expression feature, curated for PoPS
human_prostate_projected_pcaloadings_clusters.116	Gene expression feature, curated for PoPS
human_prostate_projected_pcaloadings_clusters.117	Gene expression feature, curated for PoPS
human_prostate_projected_pcaloadings_clusters.118	Gene expression feature, curated for PoPS
human_prostate_projected_pcaloadings_clusters.119	Gene expression feature, curated for PoPS
human_prostate_projected_pcaloadings_clusters.120	Gene expression feature, curated for PoPS
human_prostate_projected_pcaloadings_clusters.121	Gene expression feature, curated for PoPS
human_prostate_projected_pcaloadings_clusters.122	Gene expression feature, curated for PoPS
human_prostate_projected_pcaloadings_clusters.123	Gene expression feature, curated for PoPS
human_prostate_projected_pcaloadings_clusters.124	Gene expression feature, curated for PoPS
human_prostate_projected_pcaloadings_clusters.125	Gene expression feature, curated for PoPS
human_prostate_projected_pcaloadings_clusters.126	Gene expression feature, curated for PoPS
human_prostate_projected_pcaloadings_clusters.127	Gene expression feature, curated for PoPS
human_prostate_projected_pcaloadings_clusters.128	Gene expression feature, curated for PoPS
human_prostate_projected_pcaloadings_clusters.129	Gene expression feature, curated for PoPS
human_prostate_projected_pcaloadings_clusters.130	Gene expression feature, curated for PoPS
human_prostate_projected_pcaloadings_clusters.131	Gene expression feature, curated for PoPS
human_prostate_projected_pcaloadings_clusters.132	Gene expression feature, curated for PoPS
human_prostate_projected_pcaloadings_clusters.133	Gene expression feature, curated for PoPS
human_prostate_projected_pcaloadings_clusters.134	Gene expression feature, curated for PoPS
human_prostate_projected_pcaloadings_clusters.135	Gene expression feature, curated for PoPS
human_prostate_projected_pcaloadings_clusters.136	Gene expression feature, curated for PoPS
human_prostate_projected_pcaloadings_clusters.137	Gene expression feature, curated for PoPS
human_prostate_projected_pcaloadings_clusters.138	Gene expression feature, curated for PoPS
human_prostate_projected_pcaloadings_clusters.139	Gene expression feature, curated for PoPS
human_prostate_projected_pcaloadings_clusters.140	Gene expression feature, curated for PoPS
human_prostate_projected_pcaloadings_clusters.141	Gene expression feature, curated for PoPS
human_prostate_projected_pcaloadings_clusters.142	Gene expression feature, curated for PoPS
human_prostate_projected_pcaloadings_clusters.143	Gene expression feature, curated for PoPS
human_prostate_projected_pcaloadings_clusters.144	Gene expression feature, curated for PoPS
human_prostate_projected_pcaloadings_clusters.145	Gene expression feature, curated for PoPS
human_prostate_projected_pcaloadings_clusters.146	Gene expression feature, curated for PoPS
human_prostate_projected_pcaloadings_clusters.147	Gene expression feature, curated for PoPS
human_prostate_projected_pcaloadings_clusters.148	Gene expression feature, curated for PoPS
human_prostate_projected_pcaloadings_clusters.149	Gene expression feature, curated for PoPS
human_prostate_projected_pcaloadings_clusters.150	Gene expression feature, curated for PoPS
human_bladder_average_expression.1	Gene expression feature, curated for PoPS
human_bladder_average_expression.2	Gene expression feature, curated for PoPS
human_bladder_average_expression.3	Gene expression feature, curated for PoPS
human_bladder_average_expression.4	Gene expression feature, curated for PoPS
human_bladder_average_expression.5	Gene expression feature, curated for PoPS
human_bladder_average_expression.6	Gene expression feature, curated for PoPS
human_bladder_average_expression.7	Gene expression feature, curated for PoPS
human_bladder_average_expression.8	Gene expression feature, curated for PoPS
human_bladder_average_expression.9	Gene expression feature, curated for PoPS
human_bladder_average_expression.10	Gene expression feature, curated for PoPS
human_bladder_average_expression.11	Gene expression feature, curated for PoPS
human_bladder_average_expression.12	Gene expression feature, curated for PoPS
human_bladder_average_expression.13	Gene expression feature, curated for PoPS
human_bladder_diffexprs_down_genes_clusters.1	Gene expression feature, curated for PoPS
human_bladder_diffexprs_down_genes_clusters.2	Gene expression feature, curated for PoPS
human_bladder_diffexprs_down_genes_clusters.3	Gene expression feature, curated for PoPS
human_bladder_diffexprs_down_genes_clusters.4	Gene expression feature, curated for PoPS
human_bladder_diffexprs_down_genes_clusters.5	Gene expression feature, curated for PoPS
human_bladder_diffexprs_down_genes_clusters.6	Gene expression feature, curated for PoPS
human_bladder_diffexprs_down_genes_clusters.7	Gene expression feature, curated for PoPS
human_bladder_diffexprs_down_genes_clusters.8	Gene expression feature, curated for PoPS
human_bladder_diffexprs_down_genes_clusters.9	Gene expression feature, curated for PoPS
human_bladder_diffexprs_down_genes_clusters.10	Gene expression feature, curated for PoPS
human_bladder_diffexprs_down_genes_clusters.11	Gene expression feature, curated for PoPS
human_bladder_diffexprs_down_genes_clusters.12	Gene expression feature, curated for PoPS
human_bladder_diffexprs_genes_clusters.1	Gene expression feature, curated for PoPS
human_bladder_diffexprs_genes_clusters.2	Gene expression feature, curated for PoPS
human_bladder_diffexprs_genes_clusters.3	Gene expression feature, curated for PoPS
human_bladder_diffexprs_genes_clusters.4	Gene expression feature, curated for PoPS
human_bladder_diffexprs_genes_clusters.5	Gene expression feature, curated for PoPS
human_bladder_diffexprs_genes_clusters.6	Gene expression feature, curated for PoPS
human_bladder_diffexprs_genes_clusters.7	Gene expression feature, curated for PoPS
human_bladder_diffexprs_genes_clusters.8	Gene expression feature, curated for PoPS
human_bladder_diffexprs_genes_clusters.9	Gene expression feature, curated for PoPS
human_bladder_diffexprs_genes_clusters.10	Gene expression feature, curated for PoPS
human_bladder_diffexprs_genes_clusters.11	Gene expression feature, curated for PoPS
human_bladder_diffexprs_genes_clusters.12	Gene expression feature, curated for PoPS
human_bladder_diffexprs_tstat_clusters.1	Gene expression feature, curated for PoPS
human_bladder_diffexprs_tstat_clusters.2	Gene expression feature, curated for PoPS
human_bladder_diffexprs_tstat_clusters.3	Gene expression feature, curated for PoPS
human_bladder_diffexprs_tstat_clusters.4	Gene expression feature, curated for PoPS
human_bladder_diffexprs_tstat_clusters.5	Gene expression feature, curated for PoPS
human_bladder_diffexprs_tstat_clusters.6	Gene expression feature, curated for PoPS
human_bladder_diffexprs_tstat_clusters.7	Gene expression feature, curated for PoPS
human_bladder_diffexprs_tstat_clusters.8	Gene expression feature, curated for PoPS
human_bladder_diffexprs_tstat_clusters.9	Gene expression feature, curated for PoPS
human_bladder_diffexprs_tstat_clusters.10	Gene expression feature, curated for PoPS
human_bladder_diffexprs_tstat_clusters.11	Gene expression feature, curated for PoPS
human_bladder_diffexprs_tstat_clusters.12	Gene expression feature, curated for PoPS
human_bladder_projected_icaloadings.1	Gene expression feature, curated for PoPS
human_bladder_projected_icaloadings.2	Gene expression feature, curated for PoPS
human_bladder_projected_icaloadings.3	Gene expression feature, curated for PoPS
human_bladder_projected_icaloadings.4	Gene expression feature, curated for PoPS
human_bladder_projected_icaloadings.5	Gene expression feature, curated for PoPS
human_bladder_projected_icaloadings.6	Gene expression feature, curated for PoPS
human_bladder_projected_icaloadings.7	Gene expression feature, curated for PoPS
human_bladder_projected_icaloadings.8	Gene expression feature, curated for PoPS
human_bladder_projected_icaloadings.9	Gene expression feature, curated for PoPS
human_bladder_projected_icaloadings.10	Gene expression feature, curated for PoPS
human_bladder_projected_icaloadings.11	Gene expression feature, curated for PoPS
human_bladder_projected_icaloadings.12	Gene expression feature, curated for PoPS
human_bladder_projected_icaloadings.13	Gene expression feature, curated for PoPS
human_bladder_projected_icaloadings.14	Gene expression feature, curated for PoPS
human_bladder_projected_icaloadings.15	Gene expression feature, curated for PoPS
human_bladder_projected_icaloadings.16	Gene expression feature, curated for PoPS
human_bladder_projected_icaloadings.17	Gene expression feature, curated for PoPS
human_bladder_projected_icaloadings.18	Gene expression feature, curated for PoPS
human_bladder_projected_icaloadings.19	Gene expression feature, curated for PoPS
human_bladder_projected_icaloadings.20	Gene expression feature, curated for PoPS
human_bladder_projected_icaloadings.21	Gene expression feature, curated for PoPS
human_bladder_projected_icaloadings.22	Gene expression feature, curated for PoPS
human_bladder_projected_icaloadings.23	Gene expression feature, curated for PoPS
human_bladder_projected_icaloadings.24	Gene expression feature, curated for PoPS
human_bladder_projected_icaloadings.25	Gene expression feature, curated for PoPS
human_bladder_projected_icaloadings.26	Gene expression feature, curated for PoPS
human_bladder_projected_icaloadings.27	Gene expression feature, curated for PoPS
human_bladder_projected_icaloadings.28	Gene expression feature, curated for PoPS
human_bladder_projected_icaloadings.29	Gene expression feature, curated for PoPS
human_bladder_projected_icaloadings.30	Gene expression feature, curated for PoPS
human_bladder_projected_icaloadings.31	Gene expression feature, curated for PoPS
human_bladder_projected_icaloadings.32	Gene expression feature, curated for PoPS
human_bladder_projected_icaloadings.33	Gene expression feature, curated for PoPS
human_bladder_projected_icaloadings.34	Gene expression feature, curated for PoPS
human_bladder_projected_icaloadings.35	Gene expression feature, curated for PoPS
human_bladder_projected_pcaloadings.1	Gene expression feature, curated for PoPS
human_bladder_projected_pcaloadings.2	Gene expression feature, curated for PoPS
human_bladder_projected_pcaloadings.3	Gene expression feature, curated for PoPS
human_bladder_projected_pcaloadings.4	Gene expression feature, curated for PoPS
human_bladder_projected_pcaloadings.5	Gene expression feature, curated for PoPS
human_bladder_projected_pcaloadings.6	Gene expression feature, curated for PoPS
human_bladder_projected_pcaloadings.7	Gene expression feature, curated for PoPS
human_bladder_projected_pcaloadings.8	Gene expression feature, curated for PoPS
human_bladder_projected_pcaloadings.9	Gene expression feature, curated for PoPS
human_bladder_projected_pcaloadings.10	Gene expression feature, curated for PoPS
human_bladder_projected_pcaloadings.11	Gene expression feature, curated for PoPS
human_bladder_projected_pcaloadings.12	Gene expression feature, curated for PoPS
human_bladder_projected_pcaloadings.13	Gene expression feature, curated for PoPS
human_bladder_projected_pcaloadings.14	Gene expression feature, curated for PoPS
human_bladder_projected_pcaloadings.15	Gene expression feature, curated for PoPS
human_bladder_projected_pcaloadings.16	Gene expression feature, curated for PoPS
human_bladder_projected_pcaloadings.17	Gene expression feature, curated for PoPS
human_bladder_projected_pcaloadings.18	Gene expression feature, curated for PoPS
human_bladder_projected_pcaloadings.19	Gene expression feature, curated for PoPS
human_bladder_projected_pcaloadings.20	Gene expression feature, curated for PoPS
human_bladder_projected_pcaloadings.21	Gene expression feature, curated for PoPS
human_bladder_projected_pcaloadings.22	Gene expression feature, curated for PoPS
human_bladder_projected_pcaloadings.23	Gene expression feature, curated for PoPS
human_bladder_projected_pcaloadings.24	Gene expression feature, curated for PoPS
human_bladder_projected_pcaloadings.25	Gene expression feature, curated for PoPS
human_bladder_projected_pcaloadings.26	Gene expression feature, curated for PoPS
human_bladder_projected_pcaloadings.27	Gene expression feature, curated for PoPS
human_bladder_projected_pcaloadings.28	Gene expression feature, curated for PoPS
human_bladder_projected_pcaloadings.29	Gene expression feature, curated for PoPS
human_bladder_projected_pcaloadings.30	Gene expression feature, curated for PoPS
human_bladder_projected_pcaloadings.31	Gene expression feature, curated for PoPS
human_bladder_projected_pcaloadings.32	Gene expression feature, curated for PoPS
human_bladder_projected_pcaloadings.33	Gene expression feature, curated for PoPS
human_bladder_projected_pcaloadings.34	Gene expression feature, curated for PoPS
human_bladder_projected_pcaloadings.35	Gene expression feature, curated for PoPS
human_bladder_projected_pcaloadings.36	Gene expression feature, curated for PoPS
human_bladder_projected_pcaloadings.37	Gene expression feature, curated for PoPS
human_bladder_projected_pcaloadings.38	Gene expression feature, curated for PoPS
human_bladder_projected_pcaloadings.39	Gene expression feature, curated for PoPS
human_bladder_projected_pcaloadings.40	Gene expression feature, curated for PoPS
human_bladder_projected_pcaloadings.41	Gene expression feature, curated for PoPS
human_bladder_projected_pcaloadings.42	Gene expression feature, curated for PoPS
human_bladder_projected_pcaloadings.43	Gene expression feature, curated for PoPS
human_bladder_projected_pcaloadings.44	Gene expression feature, curated for PoPS
human_bladder_projected_pcaloadings.45	Gene expression feature, curated for PoPS
human_bladder_projected_pcaloadings.46	Gene expression feature, curated for PoPS
human_bladder_projected_pcaloadings.47	Gene expression feature, curated for PoPS
human_bladder_projected_pcaloadings.48	Gene expression feature, curated for PoPS
human_bladder_projected_pcaloadings.49	Gene expression feature, curated for PoPS
human_bladder_projected_pcaloadings.50	Gene expression feature, curated for PoPS
human_bladder_projected_pcaloadings.51	Gene expression feature, curated for PoPS
human_bladder_projected_pcaloadings.52	Gene expression feature, curated for PoPS
human_bladder_projected_pcaloadings.53	Gene expression feature, curated for PoPS
human_bladder_projected_pcaloadings.54	Gene expression feature, curated for PoPS
human_bladder_projected_pcaloadings.55	Gene expression feature, curated for PoPS
human_bladder_projected_pcaloadings.56	Gene expression feature, curated for PoPS
human_bladder_projected_pcaloadings.57	Gene expression feature, curated for PoPS
human_bladder_projected_pcaloadings.58	Gene expression feature, curated for PoPS
human_bladder_projected_pcaloadings.59	Gene expression feature, curated for PoPS
human_bladder_projected_pcaloadings.60	Gene expression feature, curated for PoPS
human_bladder_projected_pcaloadings.61	Gene expression feature, curated for PoPS
human_bladder_projected_pcaloadings.62	Gene expression feature, curated for PoPS
human_bladder_projected_pcaloadings.63	Gene expression feature, curated for PoPS
human_bladder_projected_pcaloadings.64	Gene expression feature, curated for PoPS
human_bladder_projected_pcaloadings.65	Gene expression feature, curated for PoPS
human_bladder_projected_pcaloadings.66	Gene expression feature, curated for PoPS
human_bladder_projected_pcaloadings.67	Gene expression feature, curated for PoPS
human_bladder_projected_pcaloadings.68	Gene expression feature, curated for PoPS
human_bladder_projected_pcaloadings.69	Gene expression feature, curated for PoPS
human_bladder_projected_pcaloadings.70	Gene expression feature, curated for PoPS
human_bladder_projected_pcaloadings.71	Gene expression feature, curated for PoPS
human_bladder_projected_pcaloadings.72	Gene expression feature, curated for PoPS
human_bladder_projected_pcaloadings.73	Gene expression feature, curated for PoPS
human_bladder_projected_pcaloadings.74	Gene expression feature, curated for PoPS
human_bladder_projected_pcaloadings.75	Gene expression feature, curated for PoPS
human_bladder_projected_pcaloadings.76	Gene expression feature, curated for PoPS
human_bladder_projected_pcaloadings.77	Gene expression feature, curated for PoPS
human_bladder_projected_pcaloadings.78	Gene expression feature, curated for PoPS
human_bladder_projected_pcaloadings.79	Gene expression feature, curated for PoPS
human_bladder_projected_pcaloadings.80	Gene expression feature, curated for PoPS
human_bladder_projected_pcaloadings.81	Gene expression feature, curated for PoPS
human_bladder_projected_pcaloadings.82	Gene expression feature, curated for PoPS
human_bladder_projected_pcaloadings.83	Gene expression feature, curated for PoPS
human_bladder_projected_pcaloadings.84	Gene expression feature, curated for PoPS
human_bladder_projected_pcaloadings.85	Gene expression feature, curated for PoPS
human_bladder_projected_pcaloadings.86	Gene expression feature, curated for PoPS
human_bladder_projected_pcaloadings.87	Gene expression feature, curated for PoPS
human_bladder_projected_pcaloadings.88	Gene expression feature, curated for PoPS
human_bladder_projected_pcaloadings.89	Gene expression feature, curated for PoPS
human_bladder_projected_pcaloadings.90	Gene expression feature, curated for PoPS
human_bladder_projected_pcaloadings.91	Gene expression feature, curated for PoPS
human_bladder_projected_pcaloadings.92	Gene expression feature, curated for PoPS
human_bladder_projected_pcaloadings.93	Gene expression feature, curated for PoPS
human_bladder_projected_pcaloadings.94	Gene expression feature, curated for PoPS
human_bladder_projected_pcaloadings.95	Gene expression feature, curated for PoPS
human_bladder_projected_pcaloadings.96	Gene expression feature, curated for PoPS
human_bladder_projected_pcaloadings.97	Gene expression feature, curated for PoPS
human_bladder_projected_pcaloadings.98	Gene expression feature, curated for PoPS
human_bladder_projected_pcaloadings.99	Gene expression feature, curated for PoPS
human_bladder_projected_pcaloadings.100	Gene expression feature, curated for PoPS
human_bladder_projected_pcaloadings_clusters.1	Gene expression feature, curated for PoPS
human_bladder_projected_pcaloadings_clusters.2	Gene expression feature, curated for PoPS
human_bladder_projected_pcaloadings_clusters.3	Gene expression feature, curated for PoPS
human_bladder_projected_pcaloadings_clusters.4	Gene expression feature, curated for PoPS
human_bladder_projected_pcaloadings_clusters.5	Gene expression feature, curated for PoPS
human_bladder_projected_pcaloadings_clusters.6	Gene expression feature, curated for PoPS
human_bladder_projected_pcaloadings_clusters.7	Gene expression feature, curated for PoPS
human_bladder_projected_pcaloadings_clusters.8	Gene expression feature, curated for PoPS
human_bladder_projected_pcaloadings_clusters.9	Gene expression feature, curated for PoPS
human_bladder_projected_pcaloadings_clusters.10	Gene expression feature, curated for PoPS
human_bladder_projected_pcaloadings_clusters.11	Gene expression feature, curated for PoPS
human_bladder_projected_pcaloadings_clusters.12	Gene expression feature, curated for PoPS
human_bladder_projected_pcaloadings_clusters.13	Gene expression feature, curated for PoPS
human_bladder_projected_pcaloadings_clusters.14	Gene expression feature, curated for PoPS
human_bladder_projected_pcaloadings_clusters.15	Gene expression feature, curated for PoPS
human_bladder_projected_pcaloadings_clusters.16	Gene expression feature, curated for PoPS
human_bladder_projected_pcaloadings_clusters.17	Gene expression feature, curated for PoPS
human_bladder_projected_pcaloadings_clusters.18	Gene expression feature, curated for PoPS
human_bladder_projected_pcaloadings_clusters.19	Gene expression feature, curated for PoPS
human_bladder_projected_pcaloadings_clusters.20	Gene expression feature, curated for PoPS
human_bladder_projected_pcaloadings_clusters.21	Gene expression feature, curated for PoPS
human_bladder_projected_pcaloadings_clusters.22	Gene expression feature, curated for PoPS
human_bladder_projected_pcaloadings_clusters.23	Gene expression feature, curated for PoPS
human_bladder_projected_pcaloadings_clusters.24	Gene expression feature, curated for PoPS
human_bladder_projected_pcaloadings_clusters.25	Gene expression feature, curated for PoPS
human_bladder_projected_pcaloadings_clusters.26	Gene expression feature, curated for PoPS
human_bladder_projected_pcaloadings_clusters.27	Gene expression feature, curated for PoPS
human_bladder_projected_pcaloadings_clusters.28	Gene expression feature, curated for PoPS
human_bladder_projected_pcaloadings_clusters.29	Gene expression feature, curated for PoPS
human_bladder_projected_pcaloadings_clusters.30	Gene expression feature, curated for PoPS
human_bladder_projected_pcaloadings_clusters.31	Gene expression feature, curated for PoPS
human_bladder_projected_pcaloadings_clusters.32	Gene expression feature, curated for PoPS
human_bladder_projected_pcaloadings_clusters.33	Gene expression feature, curated for PoPS
human_bladder_projected_pcaloadings_clusters.34	Gene expression feature, curated for PoPS
human_bladder_projected_pcaloadings_clusters.35	Gene expression feature, curated for PoPS
human_bladder_projected_pcaloadings_clusters.36	Gene expression feature, curated for PoPS
human_bladder_projected_pcaloadings_clusters.37	Gene expression feature, curated for PoPS
human_bladder_projected_pcaloadings_clusters.38	Gene expression feature, curated for PoPS
human_bladder_projected_pcaloadings_clusters.39	Gene expression feature, curated for PoPS
human_bladder_projected_pcaloadings_clusters.40	Gene expression feature, curated for PoPS
human_bladder_projected_pcaloadings_clusters.41	Gene expression feature, curated for PoPS
human_bladder_projected_pcaloadings_clusters.42	Gene expression feature, curated for PoPS
human_bladder_projected_pcaloadings_clusters.43	Gene expression feature, curated for PoPS
human_bladder_projected_pcaloadings_clusters.44	Gene expression feature, curated for PoPS
human_bladder_projected_pcaloadings_clusters.45	Gene expression feature, curated for PoPS
human_bladder_projected_pcaloadings_clusters.46	Gene expression feature, curated for PoPS
human_bladder_projected_pcaloadings_clusters.47	Gene expression feature, curated for PoPS
human_bladder_projected_pcaloadings_clusters.48	Gene expression feature, curated for PoPS
human_bladder_projected_pcaloadings_clusters.49	Gene expression feature, curated for PoPS
human_bladder_projected_pcaloadings_clusters.50	Gene expression feature, curated for PoPS
human_bladder_projected_pcaloadings_clusters.51	Gene expression feature, curated for PoPS
human_bladder_projected_pcaloadings_clusters.52	Gene expression feature, curated for PoPS
human_bladder_projected_pcaloadings_clusters.53	Gene expression feature, curated for PoPS
human_bladder_projected_pcaloadings_clusters.54	Gene expression feature, curated for PoPS
human_bladder_projected_pcaloadings_clusters.55	Gene expression feature, curated for PoPS
human_bladder_projected_pcaloadings_clusters.56	Gene expression feature, curated for PoPS
human_bladder_projected_pcaloadings_clusters.57	Gene expression feature, curated for PoPS
human_bladder_projected_pcaloadings_clusters.58	Gene expression feature, curated for PoPS
human_bladder_projected_pcaloadings_clusters.59	Gene expression feature, curated for PoPS
human_bladder_projected_pcaloadings_clusters.60	Gene expression feature, curated for PoPS
human_bladder_projected_pcaloadings_clusters.61	Gene expression feature, curated for PoPS
human_bladder_projected_pcaloadings_clusters.62	Gene expression feature, curated for PoPS
human_bladder_projected_pcaloadings_clusters.63	Gene expression feature, curated for PoPS
human_bladder_projected_pcaloadings_clusters.64	Gene expression feature, curated for PoPS
human_bladder_projected_pcaloadings_clusters.65	Gene expression feature, curated for PoPS
human_bladder_projected_pcaloadings_clusters.66	Gene expression feature, curated for PoPS
human_bladder_projected_pcaloadings_clusters.67	Gene expression feature, curated for PoPS
human_bladder_projected_pcaloadings_clusters.68	Gene expression feature, curated for PoPS
human_bladder_projected_pcaloadings_clusters.69	Gene expression feature, curated for PoPS
human_bladder_projected_pcaloadings_clusters.70	Gene expression feature, curated for PoPS
human_bladder_projected_pcaloadings_clusters.71	Gene expression feature, curated for PoPS
human_bladder_projected_pcaloadings_clusters.72	Gene expression feature, curated for PoPS
human_bladder_projected_pcaloadings_clusters.73	Gene expression feature, curated for PoPS
human_bladder_projected_pcaloadings_clusters.74	Gene expression feature, curated for PoPS
human_bladder_projected_pcaloadings_clusters.75	Gene expression feature, curated for PoPS
human_bladder_projected_pcaloadings_clusters.76	Gene expression feature, curated for PoPS
human_bladder_projected_pcaloadings_clusters.77	Gene expression feature, curated for PoPS
human_bladder_projected_pcaloadings_clusters.78	Gene expression feature, curated for PoPS
human_bladder_projected_pcaloadings_clusters.79	Gene expression feature, curated for PoPS
human_bladder_projected_pcaloadings_clusters.80	Gene expression feature, curated for PoPS
human_bladder_projected_pcaloadings_clusters.81	Gene expression feature, curated for PoPS
human_bladder_projected_pcaloadings_clusters.82	Gene expression feature, curated for PoPS
human_bladder_projected_pcaloadings_clusters.83	Gene expression feature, curated for PoPS
human_bladder_projected_pcaloadings_clusters.84	Gene expression feature, curated for PoPS
human_bladder_projected_pcaloadings_clusters.85	Gene expression feature, curated for PoPS
human_bladder_projected_pcaloadings_clusters.86	Gene expression feature, curated for PoPS
human_bladder_projected_pcaloadings_clusters.87	Gene expression feature, curated for PoPS
human_bladder_projected_pcaloadings_clusters.88	Gene expression feature, curated for PoPS
human_bladder_projected_pcaloadings_clusters.89	Gene expression feature, curated for PoPS
human_bladder_projected_pcaloadings_clusters.90	Gene expression feature, curated for PoPS
human_bladder_projected_pcaloadings_clusters.91	Gene expression feature, curated for PoPS
human_bladder_projected_pcaloadings_clusters.92	Gene expression feature, curated for PoPS
human_bladder_projected_pcaloadings_clusters.93	Gene expression feature, curated for PoPS
human_bladder_projected_pcaloadings_clusters.94	Gene expression feature, curated for PoPS
human_bladder_projected_pcaloadings_clusters.95	Gene expression feature, curated for PoPS
human_bladder_projected_pcaloadings_clusters.96	Gene expression feature, curated for PoPS
human_bladder_projected_pcaloadings_clusters.97	Gene expression feature, curated for PoPS
human_bladder_projected_pcaloadings_clusters.98	Gene expression feature, curated for PoPS
human_bladder_projected_pcaloadings_clusters.99	Gene expression feature, curated for PoPS
human_bladder_projected_pcaloadings_clusters.100	Gene expression feature, curated for PoPS
human_bladder_projected_pcaloadings_clusters.101	Gene expression feature, curated for PoPS
human_bladder_projected_pcaloadings_clusters.102	Gene expression feature, curated for PoPS
human_bladder_projected_pcaloadings_clusters.103	Gene expression feature, curated for PoPS
human_bladder_projected_pcaloadings_clusters.104	Gene expression feature, curated for PoPS
human_bladder_projected_pcaloadings_clusters.105	Gene expression feature, curated for PoPS
human_bladder_projected_pcaloadings_clusters.106	Gene expression feature, curated for PoPS
human_bladder_projected_pcaloadings_clusters.107	Gene expression feature, curated for PoPS
human_bladder_projected_pcaloadings_clusters.108	Gene expression feature, curated for PoPS
human_bladder_projected_pcaloadings_clusters.109	Gene expression feature, curated for PoPS
human_bladder_projected_pcaloadings_clusters.110	Gene expression feature, curated for PoPS
human_bladder_projected_pcaloadings_clusters.111	Gene expression feature, curated for PoPS
human_bladder_projected_pcaloadings_clusters.112	Gene expression feature, curated for PoPS
human_bladder_projected_pcaloadings_clusters.113	Gene expression feature, curated for PoPS
human_bladder_projected_pcaloadings_clusters.114	Gene expression feature, curated for PoPS
human_bladder_projected_pcaloadings_clusters.115	Gene expression feature, curated for PoPS
human_bladder_projected_pcaloadings_clusters.116	Gene expression feature, curated for PoPS
human_bladder_projected_pcaloadings_clusters.117	Gene expression feature, curated for PoPS
human_bladder_projected_pcaloadings_clusters.118	Gene expression feature, curated for PoPS
human_bladder_projected_pcaloadings_clusters.119	Gene expression feature, curated for PoPS
human_bladder_projected_pcaloadings_clusters.120	Gene expression feature, curated for PoPS
human_retina_average_expression.1	Gene expression feature, curated for PoPS
human_retina_average_expression.2	Gene expression feature, curated for PoPS
human_retina_average_expression.3	Gene expression feature, curated for PoPS
human_retina_average_expression.4	Gene expression feature, curated for PoPS
human_retina_average_expression.5	Gene expression feature, curated for PoPS
human_retina_average_expression.6	Gene expression feature, curated for PoPS
human_retina_average_expression.7	Gene expression feature, curated for PoPS
human_retina_average_expression.8	Gene expression feature, curated for PoPS
human_retina_average_expression.9	Gene expression feature, curated for PoPS
human_retina_average_expression.10	Gene expression feature, curated for PoPS
human_retina_average_expression.11	Gene expression feature, curated for PoPS
human_retina_average_expression.12	Gene expression feature, curated for PoPS
human_retina_average_expression.13	Gene expression feature, curated for PoPS
human_retina_average_expression.14	Gene expression feature, curated for PoPS
human_retina_average_expression.15	Gene expression feature, curated for PoPS
human_retina_average_expression.16	Gene expression feature, curated for PoPS
human_retina_average_expression.17	Gene expression feature, curated for PoPS
human_retina_average_expression.18	Gene expression feature, curated for PoPS
human_retina_average_expression.19	Gene expression feature, curated for PoPS
human_retina_average_expression.20	Gene expression feature, curated for PoPS
human_retina_average_expression.21	Gene expression feature, curated for PoPS
human_retina_average_expression.22	Gene expression feature, curated for PoPS
human_retina_diffexprs_down_genes_clusters.1	Gene expression feature, curated for PoPS
human_retina_diffexprs_down_genes_clusters.2	Gene expression feature, curated for PoPS
human_retina_diffexprs_down_genes_clusters.3	Gene expression feature, curated for PoPS
human_retina_diffexprs_down_genes_clusters.4	Gene expression feature, curated for PoPS
human_retina_diffexprs_down_genes_clusters.5	Gene expression feature, curated for PoPS
human_retina_diffexprs_down_genes_clusters.6	Gene expression feature, curated for PoPS
human_retina_diffexprs_down_genes_clusters.7	Gene expression feature, curated for PoPS
human_retina_diffexprs_down_genes_clusters.8	Gene expression feature, curated for PoPS
human_retina_diffexprs_down_genes_clusters.9	Gene expression feature, curated for PoPS
human_retina_diffexprs_down_genes_clusters.10	Gene expression feature, curated for PoPS
human_retina_diffexprs_down_genes_clusters.11	Gene expression feature, curated for PoPS
human_retina_diffexprs_down_genes_clusters.12	Gene expression feature, curated for PoPS
human_retina_diffexprs_down_genes_clusters.13	Gene expression feature, curated for PoPS
human_retina_diffexprs_down_genes_clusters.14	Gene expression feature, curated for PoPS
human_retina_diffexprs_down_genes_clusters.15	Gene expression feature, curated for PoPS
human_retina_diffexprs_down_genes_clusters.16	Gene expression feature, curated for PoPS
human_retina_diffexprs_down_genes_clusters.17	Gene expression feature, curated for PoPS
human_retina_diffexprs_down_genes_clusters.18	Gene expression feature, curated for PoPS
human_retina_diffexprs_down_genes_clusters.19	Gene expression feature, curated for PoPS
human_retina_diffexprs_down_genes_clusters.20	Gene expression feature, curated for PoPS
human_retina_diffexprs_down_genes_clusters.21	Gene expression feature, curated for PoPS
human_retina_diffexprs_genes_clusters.1	Gene expression feature, curated for PoPS
human_retina_diffexprs_genes_clusters.2	Gene expression feature, curated for PoPS
human_retina_diffexprs_genes_clusters.3	Gene expression feature, curated for PoPS
human_retina_diffexprs_genes_clusters.4	Gene expression feature, curated for PoPS
human_retina_diffexprs_genes_clusters.5	Gene expression feature, curated for PoPS
human_retina_diffexprs_genes_clusters.6	Gene expression feature, curated for PoPS
[truncated: 38,466 more rows]

## Sheet: pathways_and_go_term_features
Column name	Description
TF	Gene is a transcription factor
pathways.1	Membership in a pathway, curated for PoPS
pathways.2	Membership in a pathway, curated for PoPS
pathways.3	Membership in a pathway, curated for PoPS
pathways.4	Membership in a pathway, curated for PoPS
pathways.5	Membership in a pathway, curated for PoPS
pathways.6	Membership in a pathway, curated for PoPS
pathways.7	Membership in a pathway, curated for PoPS
pathways.8	Membership in a pathway, curated for PoPS
pathways.9	Membership in a pathway, curated for PoPS
pathways.10	Membership in a pathway, curated for PoPS
pathways.11	Membership in a pathway, curated for PoPS
pathways.12	Membership in a pathway, curated for PoPS
pathways.13	Membership in a pathway, curated for PoPS
pathways.14	Membership in a pathway, curated for PoPS
pathways.15	Membership in a pathway, curated for PoPS
pathways.16	Membership in a pathway, curated for PoPS
pathways.17	Membership in a pathway, curated for PoPS
pathways.18	Membership in a pathway, curated for PoPS
pathways.19	Membership in a pathway, curated for PoPS
pathways.20	Membership in a pathway, curated for PoPS
pathways.21	Membership in a pathway, curated for PoPS
pathways.22	Membership in a pathway, curated for PoPS
pathways.23	Membership in a pathway, curated for PoPS
pathways.24	Membership in a pathway, curated for PoPS
pathways.25	Membership in a pathway, curated for PoPS
pathways.26	Membership in a pathway, curated for PoPS
pathways.27	Membership in a pathway, curated for PoPS
pathways.28	Membership in a pathway, curated for PoPS
pathways.29	Membership in a pathway, curated for PoPS
pathways.30	Membership in a pathway, curated for PoPS
pathways.31	Membership in a pathway, curated for PoPS
pathways.32	Membership in a pathway, curated for PoPS
pathways.33	Membership in a pathway, curated for PoPS
pathways.34	Membership in a pathway, curated for PoPS
pathways.35	Membership in a pathway, curated for PoPS
pathways.36	Membership in a pathway, curated for PoPS
pathways.37	Membership in a pathway, curated for PoPS
pathways.38	Membership in a pathway, curated for PoPS
pathways.39	Membership in a pathway, curated for PoPS
pathways.40	Membership in a pathway, curated for PoPS
pathways.41	Membership in a pathway, curated for PoPS
pathways.42	Membership in a pathway, curated for PoPS
pathways.43	Membership in a pathway, curated for PoPS
pathways.44	Membership in a pathway, curated for PoPS
pathways.45	Membership in a pathway, curated for PoPS
pathways.46	Membership in a pathway, curated for PoPS
pathways.47	Membership in a pathway, curated for PoPS
pathways.48	Membership in a pathway, curated for PoPS
pathways.49	Membership in a pathway, curated for PoPS
pathways.50	Membership in a pathway, curated for PoPS
pathways.51	Membership in a pathway, curated for PoPS
pathways.52	Membership in a pathway, curated for PoPS
pathways.53	Membership in a pathway, curated for PoPS
pathways.54	Membership in a pathway, curated for PoPS
pathways.55	Membership in a pathway, curated for PoPS
pathways.56	Membership in a pathway, curated for PoPS
pathways.57	Membership in a pathway, curated for PoPS
pathways.58	Membership in a pathway, curated for PoPS
pathways.59	Membership in a pathway, curated for PoPS
pathways.60	Membership in a pathway, curated for PoPS
pathways.61	Membership in a pathway, curated for PoPS
pathways.62	Membership in a pathway, curated for PoPS
pathways.63	Membership in a pathway, curated for PoPS
pathways.64	Membership in a pathway, curated for PoPS
pathways.65	Membership in a pathway, curated for PoPS
pathways.66	Membership in a pathway, curated for PoPS
pathways.67	Membership in a pathway, curated for PoPS
pathways.68	Membership in a pathway, curated for PoPS
pathways.69	Membership in a pathway, curated for PoPS
pathways.70	Membership in a pathway, curated for PoPS
pathways.71	Membership in a pathway, curated for PoPS
pathways.72	Membership in a pathway, curated for PoPS
pathways.73	Membership in a pathway, curated for PoPS
pathways.74	Membership in a pathway, curated for PoPS
pathways.75	Membership in a pathway, curated for PoPS
pathways.76	Membership in a pathway, curated for PoPS
pathways.77	Membership in a pathway, curated for PoPS
pathways.78	Membership in a pathway, curated for PoPS
pathways.79	Membership in a pathway, curated for PoPS
pathways.80	Membership in a pathway, curated for PoPS
pathways.81	Membership in a pathway, curated for PoPS
pathways.82	Membership in a pathway, curated for PoPS
pathways.83	Membership in a pathway, curated for PoPS
pathways.84	Membership in a pathway, curated for PoPS
pathways.85	Membership in a pathway, curated for PoPS
pathways.86	Membership in a pathway, curated for PoPS
pathways.87	Membership in a pathway, curated for PoPS
pathways.88	Membership in a pathway, curated for PoPS
pathways.89	Membership in a pathway, curated for PoPS
pathways.90	Membership in a pathway, curated for PoPS
pathways.91	Membership in a pathway, curated for PoPS
pathways.92	Membership in a pathway, curated for PoPS
pathways.93	Membership in a pathway, curated for PoPS
pathways.94	Membership in a pathway, curated for PoPS
pathways.95	Membership in a pathway, curated for PoPS
pathways.96	Membership in a pathway, curated for PoPS
pathways.97	Membership in a pathway, curated for PoPS
pathways.98	Membership in a pathway, curated for PoPS
pathways.99	Membership in a pathway, curated for PoPS
pathways.100	Membership in a pathway, curated for PoPS
pathways.101	Membership in a pathway, curated for PoPS
pathways.102	Membership in a pathway, curated for PoPS
pathways.103	Membership in a pathway, curated for PoPS
pathways.104	Membership in a pathway, curated for PoPS
pathways.105	Membership in a pathway, curated for PoPS
pathways.106	Membership in a pathway, curated for PoPS
pathways.107	Membership in a pathway, curated for PoPS
pathways.108	Membership in a pathway, curated for PoPS
pathways.109	Membership in a pathway, curated for PoPS
pathways.110	Membership in a pathway, curated for PoPS
pathways.111	Membership in a pathway, curated for PoPS
pathways.112	Membership in a pathway, curated for PoPS
pathways.113	Membership in a pathway, curated for PoPS
pathways.114	Membership in a pathway, curated for PoPS
pathways.115	Membership in a pathway, curated for PoPS
pathways.116	Membership in a pathway, curated for PoPS
pathways.117	Membership in a pathway, curated for PoPS
pathways.118	Membership in a pathway, curated for PoPS
pathways.119	Membership in a pathway, curated for PoPS
pathways.120	Membership in a pathway, curated for PoPS
pathways.121	Membership in a pathway, curated for PoPS
pathways.122	Membership in a pathway, curated for PoPS
pathways.123	Membership in a pathway, curated for PoPS
pathways.124	Membership in a pathway, curated for PoPS
pathways.125	Membership in a pathway, curated for PoPS
pathways.126	Membership in a pathway, curated for PoPS
pathways.127	Membership in a pathway, curated for PoPS
pathways.128	Membership in a pathway, curated for PoPS
pathways.129	Membership in a pathway, curated for PoPS
pathways.130	Membership in a pathway, curated for PoPS
pathways.131	Membership in a pathway, curated for PoPS
pathways.132	Membership in a pathway, curated for PoPS
pathways.133	Membership in a pathway, curated for PoPS
pathways.134	Membership in a pathway, curated for PoPS
pathways.135	Membership in a pathway, curated for PoPS
pathways.136	Membership in a pathway, curated for PoPS
pathways.137	Membership in a pathway, curated for PoPS
pathways.138	Membership in a pathway, curated for PoPS
pathways.139	Membership in a pathway, curated for PoPS
pathways.140	Membership in a pathway, curated for PoPS
pathways.141	Membership in a pathway, curated for PoPS
pathways.142	Membership in a pathway, curated for PoPS
pathways.143	Membership in a pathway, curated for PoPS
pathways.144	Membership in a pathway, curated for PoPS
pathways.145	Membership in a pathway, curated for PoPS
pathways.146	Membership in a pathway, curated for PoPS
pathways.147	Membership in a pathway, curated for PoPS
pathways.148	Membership in a pathway, curated for PoPS
pathways.149	Membership in a pathway, curated for PoPS
pathways.150	Membership in a pathway, curated for PoPS
pathways.151	Membership in a pathway, curated for PoPS
pathways.152	Membership in a pathway, curated for PoPS
pathways.153	Membership in a pathway, curated for PoPS
pathways.154	Membership in a pathway, curated for PoPS
pathways.155	Membership in a pathway, curated for PoPS
pathways.156	Membership in a pathway, curated for PoPS
pathways.157	Membership in a pathway, curated for PoPS
pathways.158	Membership in a pathway, curated for PoPS
pathways.159	Membership in a pathway, curated for PoPS
pathways.160	Membership in a pathway, curated for PoPS
pathways.161	Membership in a pathway, curated for PoPS
pathways.162	Membership in a pathway, curated for PoPS
pathways.163	Membership in a pathway, curated for PoPS
pathways.164	Membership in a pathway, curated for PoPS
pathways.165	Membership in a pathway, curated for PoPS
pathways.166	Membership in a pathway, curated for PoPS
pathways.167	Membership in a pathway, curated for PoPS
pathways.168	Membership in a pathway, curated for PoPS
pathways.169	Membership in a pathway, curated for PoPS
pathways.170	Membership in a pathway, curated for PoPS
pathways.171	Membership in a pathway, curated for PoPS
pathways.172	Membership in a pathway, curated for PoPS
pathways.173	Membership in a pathway, curated for PoPS
pathways.174	Membership in a pathway, curated for PoPS
pathways.175	Membership in a pathway, curated for PoPS
pathways.176	Membership in a pathway, curated for PoPS
pathways.177	Membership in a pathway, curated for PoPS
pathways.178	Membership in a pathway, curated for PoPS
pathways.179	Membership in a pathway, curated for PoPS
pathways.180	Membership in a pathway, curated for PoPS
pathways.181	Membership in a pathway, curated for PoPS
pathways.182	Membership in a pathway, curated for PoPS
pathways.183	Membership in a pathway, curated for PoPS
pathways.184	Membership in a pathway, curated for PoPS
pathways.185	Membership in a pathway, curated for PoPS
pathways.186	Membership in a pathway, curated for PoPS
pathways.187	Membership in a pathway, curated for PoPS
pathways.188	Membership in a pathway, curated for PoPS
pathways.189	Membership in a pathway, curated for PoPS
pathways.190	Membership in a pathway, curated for PoPS
pathways.191	Membership in a pathway, curated for PoPS
pathways.192	Membership in a pathway, curated for PoPS
pathways.193	Membership in a pathway, curated for PoPS
pathways.194	Membership in a pathway, curated for PoPS
pathways.195	Membership in a pathway, curated for PoPS
pathways.196	Membership in a pathway, curated for PoPS
pathways.197	Membership in a pathway, curated for PoPS
pathways.198	Membership in a pathway, curated for PoPS
pathways.199	Membership in a pathway, curated for PoPS
pathways.200	Membership in a pathway, curated for PoPS
pathways.201	Membership in a pathway, curated for PoPS
pathways.202	Membership in a pathway, curated for PoPS
pathways.203	Membership in a pathway, curated for PoPS
pathways.204	Membership in a pathway, curated for PoPS
pathways.205	Membership in a pathway, curated for PoPS
pathways.206	Membership in a pathway, curated for PoPS
pathways.207	Membership in a pathway, curated for PoPS
pathways.208	Membership in a pathway, curated for PoPS
pathways.209	Membership in a pathway, curated for PoPS
pathways.210	Membership in a pathway, curated for PoPS
pathways.211	Membership in a pathway, curated for PoPS
pathways.212	Membership in a pathway, curated for PoPS
pathways.213	Membership in a pathway, curated for PoPS
pathways.214	Membership in a pathway, curated for PoPS
pathways.215	Membership in a pathway, curated for PoPS
pathways.216	Membership in a pathway, curated for PoPS
pathways.217	Membership in a pathway, curated for PoPS
pathways.218	Membership in a pathway, curated for PoPS
pathways.219	Membership in a pathway, curated for PoPS
pathways.220	Membership in a pathway, curated for PoPS
pathways.221	Membership in a pathway, curated for PoPS
pathways.222	Membership in a pathway, curated for PoPS
pathways.223	Membership in a pathway, curated for PoPS
pathways.224	Membership in a pathway, curated for PoPS
pathways.225	Membership in a pathway, curated for PoPS
pathways.226	Membership in a pathway, curated for PoPS
pathways.227	Membership in a pathway, curated for PoPS
pathways.228	Membership in a pathway, curated for PoPS
pathways.229	Membership in a pathway, curated for PoPS
pathways.230	Membership in a pathway, curated for PoPS
pathways.231	Membership in a pathway, curated for PoPS
pathways.232	Membership in a pathway, curated for PoPS
pathways.233	Membership in a pathway, curated for PoPS
pathways.234	Membership in a pathway, curated for PoPS
pathways.235	Membership in a pathway, curated for PoPS
pathways.236	Membership in a pathway, curated for PoPS
pathways.237	Membership in a pathway, curated for PoPS
pathways.238	Membership in a pathway, curated for PoPS
pathways.239	Membership in a pathway, curated for PoPS
pathways.240	Membership in a pathway, curated for PoPS
pathways.241	Membership in a pathway, curated for PoPS
pathways.242	Membership in a pathway, curated for PoPS
pathways.243	Membership in a pathway, curated for PoPS
pathways.244	Membership in a pathway, curated for PoPS
pathways.245	Membership in a pathway, curated for PoPS
pathways.246	Membership in a pathway, curated for PoPS
pathways.247	Membership in a pathway, curated for PoPS
pathways.248	Membership in a pathway, curated for PoPS
pathways.249	Membership in a pathway, curated for PoPS
pathways.250	Membership in a pathway, curated for PoPS
pathways.251	Membership in a pathway, curated for PoPS
pathways.252	Membership in a pathway, curated for PoPS
pathways.253	Membership in a pathway, curated for PoPS
pathways.254	Membership in a pathway, curated for PoPS
pathways.255	Membership in a pathway, curated for PoPS
pathways.256	Membership in a pathway, curated for PoPS
pathways.257	Membership in a pathway, curated for PoPS
pathways.258	Membership in a pathway, curated for PoPS
pathways.259	Membership in a pathway, curated for PoPS
pathways.260	Membership in a pathway, curated for PoPS
pathways.261	Membership in a pathway, curated for PoPS
pathways.262	Membership in a pathway, curated for PoPS
pathways.263	Membership in a pathway, curated for PoPS
pathways.264	Membership in a pathway, curated for PoPS
pathways.265	Membership in a pathway, curated for PoPS
pathways.266	Membership in a pathway, curated for PoPS
pathways.267	Membership in a pathway, curated for PoPS
pathways.268	Membership in a pathway, curated for PoPS
pathways.269	Membership in a pathway, curated for PoPS
pathways.270	Membership in a pathway, curated for PoPS
pathways.271	Membership in a pathway, curated for PoPS
pathways.272	Membership in a pathway, curated for PoPS
pathways.273	Membership in a pathway, curated for PoPS
pathways.274	Membership in a pathway, curated for PoPS
pathways.275	Membership in a pathway, curated for PoPS
pathways.276	Membership in a pathway, curated for PoPS
pathways.277	Membership in a pathway, curated for PoPS
pathways.278	Membership in a pathway, curated for PoPS
pathways.279	Membership in a pathway, curated for PoPS
pathways.280	Membership in a pathway, curated for PoPS
pathways.281	Membership in a pathway, curated for PoPS
pathways.282	Membership in a pathway, curated for PoPS
pathways.283	Membership in a pathway, curated for PoPS
pathways.284	Membership in a pathway, curated for PoPS
pathways.285	Membership in a pathway, curated for PoPS
pathways.286	Membership in a pathway, curated for PoPS
pathways.287	Membership in a pathway, curated for PoPS
pathways.288	Membership in a pathway, curated for PoPS
pathways.289	Membership in a pathway, curated for PoPS
pathways.290	Membership in a pathway, curated for PoPS
pathways.291	Membership in a pathway, curated for PoPS
pathways.292	Membership in a pathway, curated for PoPS
pathways.293	Membership in a pathway, curated for PoPS
pathways.294	Membership in a pathway, curated for PoPS
pathways.295	Membership in a pathway, curated for PoPS
pathways.296	Membership in a pathway, curated for PoPS
pathways.297	Membership in a pathway, curated for PoPS
pathways.298	Membership in a pathway, curated for PoPS
pathways.299	Membership in a pathway, curated for PoPS
pathways.300	Membership in a pathway, curated for PoPS
pathways.301	Membership in a pathway, curated for PoPS
pathways.302	Membership in a pathway, curated for PoPS
pathways.303	Membership in a pathway, curated for PoPS
pathways.304	Membership in a pathway, curated for PoPS
pathways.305	Membership in a pathway, curated for PoPS
pathways.306	Membership in a pathway, curated for PoPS
pathways.307	Membership in a pathway, curated for PoPS
pathways.308	Membership in a pathway, curated for PoPS
pathways.309	Membership in a pathway, curated for PoPS
pathways.310	Membership in a pathway, curated for PoPS
pathways.311	Membership in a pathway, curated for PoPS
pathways.312	Membership in a pathway, curated for PoPS
pathways.313	Membership in a pathway, curated for PoPS
pathways.314	Membership in a pathway, curated for PoPS
pathways.315	Membership in a pathway, curated for PoPS
pathways.316	Membership in a pathway, curated for PoPS
pathways.317	Membership in a pathway, curated for PoPS
pathways.318	Membership in a pathway, curated for PoPS
pathways.319	Membership in a pathway, curated for PoPS
pathways.320	Membership in a pathway, curated for PoPS
pathways.321	Membership in a pathway, curated for PoPS
pathways.322	Membership in a pathway, curated for PoPS
pathways.323	Membership in a pathway, curated for PoPS
pathways.324	Membership in a pathway, curated for PoPS
pathways.325	Membership in a pathway, curated for PoPS
pathways.326	Membership in a pathway, curated for PoPS
pathways.327	Membership in a pathway, curated for PoPS
pathways.328	Membership in a pathway, curated for PoPS
pathways.329	Membership in a pathway, curated for PoPS
pathways.330	Membership in a pathway, curated for PoPS
pathways.331	Membership in a pathway, curated for PoPS
pathways.332	Membership in a pathway, curated for PoPS
pathways.333	Membership in a pathway, curated for PoPS
pathways.334	Membership in a pathway, curated for PoPS
pathways.335	Membership in a pathway, curated for PoPS
pathways.336	Membership in a pathway, curated for PoPS
pathways.337	Membership in a pathway, curated for PoPS
pathways.338	Membership in a pathway, curated for PoPS
pathways.339	Membership in a pathway, curated for PoPS
pathways.340	Membership in a pathway, curated for PoPS
pathways.341	Membership in a pathway, curated for PoPS
pathways.342	Membership in a pathway, curated for PoPS
pathways.343	Membership in a pathway, curated for PoPS
pathways.344	Membership in a pathway, curated for PoPS
pathways.345	Membership in a pathway, curated for PoPS
pathways.346	Membership in a pathway, curated for PoPS
pathways.347	Membership in a pathway, curated for PoPS
pathways.348	Membership in a pathway, curated for PoPS
pathways.349	Membership in a pathway, curated for PoPS
pathways.350	Membership in a pathway, curated for PoPS
pathways.351	Membership in a pathway, curated for PoPS
pathways.352	Membership in a pathway, curated for PoPS
pathways.353	Membership in a pathway, curated for PoPS
pathways.354	Membership in a pathway, curated for PoPS
pathways.355	Membership in a pathway, curated for PoPS
pathways.356	Membership in a pathway, curated for PoPS
pathways.357	Membership in a pathway, curated for PoPS
pathways.358	Membership in a pathway, curated for PoPS
pathways.359	Membership in a pathway, curated for PoPS
pathways.360	Membership in a pathway, curated for PoPS
pathways.361	Membership in a pathway, curated for PoPS
pathways.362	Membership in a pathway, curated for PoPS
pathways.363	Membership in a pathway, curated for PoPS
pathways.364	Membership in a pathway, curated for PoPS
pathways.365	Membership in a pathway, curated for PoPS
pathways.366	Membership in a pathway, curated for PoPS
pathways.367	Membership in a pathway, curated for PoPS
pathways.368	Membership in a pathway, curated for PoPS
pathways.369	Membership in a pathway, curated for PoPS
pathways.370	Membership in a pathway, curated for PoPS
pathways.371	Membership in a pathway, curated for PoPS
pathways.372	Membership in a pathway, curated for PoPS
pathways.373	Membership in a pathway, curated for PoPS
pathways.374	Membership in a pathway, curated for PoPS
pathways.375	Membership in a pathway, curated for PoPS
pathways.376	Membership in a pathway, curated for PoPS
pathways.377	Membership in a pathway, curated for PoPS
pathways.378	Membership in a pathway, curated for PoPS
pathways.379	Membership in a pathway, curated for PoPS
pathways.380	Membership in a pathway, curated for PoPS
pathways.381	Membership in a pathway, curated for PoPS
pathways.382	Membership in a pathway, curated for PoPS
pathways.383	Membership in a pathway, curated for PoPS
pathways.384	Membership in a pathway, curated for PoPS
pathways.385	Membership in a pathway, curated for PoPS
pathways.386	Membership in a pathway, curated for PoPS
pathways.387	Membership in a pathway, curated for PoPS
pathways.388	Membership in a pathway, curated for PoPS
pathways.389	Membership in a pathway, curated for PoPS
pathways.390	Membership in a pathway, curated for PoPS
pathways.391	Membership in a pathway, curated for PoPS
pathways.392	Membership in a pathway, curated for PoPS
pathways.393	Membership in a pathway, curated for PoPS
pathways.394	Membership in a pathway, curated for PoPS
pathways.395	Membership in a pathway, curated for PoPS
pathways.396	Membership in a pathway, curated for PoPS
pathways.397	Membership in a pathway, curated for PoPS
pathways.398	Membership in a pathway, curated for PoPS
pathways.399	Membership in a pathway, curated for PoPS
pathways.400	Membership in a pathway, curated for PoPS
pathways.401	Membership in a pathway, curated for PoPS
pathways.402	Membership in a pathway, curated for PoPS
pathways.403	Membership in a pathway, curated for PoPS
pathways.404	Membership in a pathway, curated for PoPS
pathways.405	Membership in a pathway, curated for PoPS
pathways.406	Membership in a pathway, curated for PoPS
pathways.407	Membership in a pathway, curated for PoPS
pathways.408	Membership in a pathway, curated for PoPS
pathways.409	Membership in a pathway, curated for PoPS
pathways.410	Membership in a pathway, curated for PoPS
pathways.411	Membership in a pathway, curated for PoPS
pathways.412	Membership in a pathway, curated for PoPS
pathways.413	Membership in a pathway, curated for PoPS
pathways.414	Membership in a pathway, curated for PoPS
pathways.415	Membership in a pathway, curated for PoPS
pathways.416	Membership in a pathway, curated for PoPS
pathways.417	Membership in a pathway, curated for PoPS
pathways.418	Membership in a pathway, curated for PoPS
pathways.419	Membership in a pathway, curated for PoPS
pathways.420	Membership in a pathway, curated for PoPS
pathways.421	Membership in a pathway, curated for PoPS
pathways.422	Membership in a pathway, curated for PoPS
pathways.423	Membership in a pathway, curated for PoPS
pathways.424	Membership in a pathway, curated for PoPS
pathways.425	Membership in a pathway, curated for PoPS
pathways.426	Membership in a pathway, curated for PoPS
pathways.427	Membership in a pathway, curated for PoPS
pathways.428	Membership in a pathway, curated for PoPS
pathways.429	Membership in a pathway, curated for PoPS
pathways.430	Membership in a pathway, curated for PoPS
pathways.431	Membership in a pathway, curated for PoPS
pathways.432	Membership in a pathway, curated for PoPS
pathways.433	Membership in a pathway, curated for PoPS
pathways.434	Membership in a pathway, curated for PoPS
pathways.435	Membership in a pathway, curated for PoPS
pathways.436	Membership in a pathway, curated for PoPS
pathways.437	Membership in a pathway, curated for PoPS
pathways.438	Membership in a pathway, curated for PoPS
pathways.439	Membership in a pathway, curated for PoPS
pathways.440	Membership in a pathway, curated for PoPS
pathways.441	Membership in a pathway, curated for PoPS
pathways.442	Membership in a pathway, curated for PoPS
pathways.443	Membership in a pathway, curated for PoPS
pathways.444	Membership in a pathway, curated for PoPS
pathways.445	Membership in a pathway, curated for PoPS
pathways.446	Membership in a pathway, curated for PoPS
pathways.447	Membership in a pathway, curated for PoPS
pathways.448	Membership in a pathway, curated for PoPS
pathways.449	Membership in a pathway, curated for PoPS
pathways.450	Membership in a pathway, curated for PoPS
pathways.451	Membership in a pathway, curated for PoPS
pathways.452	Membership in a pathway, curated for PoPS
pathways.453	Membership in a pathway, curated for PoPS
pathways.454	Membership in a pathway, curated for PoPS
pathways.455	Membership in a pathway, curated for PoPS
pathways.456	Membership in a pathway, curated for PoPS
pathways.457	Membership in a pathway, curated for PoPS
pathways.458	Membership in a pathway, curated for PoPS
pathways.459	Membership in a pathway, curated for PoPS
pathways.460	Membership in a pathway, curated for PoPS
pathways.461	Membership in a pathway, curated for PoPS
pathways.462	Membership in a pathway, curated for PoPS
pathways.463	Membership in a pathway, curated for PoPS
pathways.464	Membership in a pathway, curated for PoPS
pathways.465	Membership in a pathway, curated for PoPS
pathways.466	Membership in a pathway, curated for PoPS
pathways.467	Membership in a pathway, curated for PoPS
pathways.468	Membership in a pathway, curated for PoPS
pathways.469	Membership in a pathway, curated for PoPS
pathways.470	Membership in a pathway, curated for PoPS
pathways.471	Membership in a pathway, curated for PoPS
pathways.472	Membership in a pathway, curated for PoPS
pathways.473	Membership in a pathway, curated for PoPS
pathways.474	Membership in a pathway, curated for PoPS
pathways.475	Membership in a pathway, curated for PoPS
pathways.476	Membership in a pathway, curated for PoPS
pathways.477	Membership in a pathway, curated for PoPS
pathways.478	Membership in a pathway, curated for PoPS
pathways.479	Membership in a pathway, curated for PoPS
pathways.480	Membership in a pathway, curated for PoPS
pathways.481	Membership in a pathway, curated for PoPS
pathways.482	Membership in a pathway, curated for PoPS
pathways.483	Membership in a pathway, curated for PoPS
pathways.484	Membership in a pathway, curated for PoPS
pathways.485	Membership in a pathway, curated for PoPS
pathways.486	Membership in a pathway, curated for PoPS
pathways.487	Membership in a pathway, curated for PoPS
pathways.488	Membership in a pathway, curated for PoPS
pathways.489	Membership in a pathway, curated for PoPS
pathways.490	Membership in a pathway, curated for PoPS
pathways.491	Membership in a pathway, curated for PoPS
pathways.492	Membership in a pathway, curated for PoPS
pathways.493	Membership in a pathway, curated for PoPS
pathways.494	Membership in a pathway, curated for PoPS
pathways.495	Membership in a pathway, curated for PoPS
pathways.496	Membership in a pathway, curated for PoPS
pathways.497	Membership in a pathway, curated for PoPS
pathways.498	Membership in a pathway, curated for PoPS
pathways.499	Membership in a pathway, curated for PoPS
pathways.500	Membership in a pathway, curated for PoPS
pathways.501	Membership in a pathway, curated for PoPS
pathways.502	Membership in a pathway, curated for PoPS
pathways.503	Membership in a pathway, curated for PoPS
pathways.504	Membership in a pathway, curated for PoPS
pathways.505	Membership in a pathway, curated for PoPS
pathways.506	Membership in a pathway, curated for PoPS
pathways.507	Membership in a pathway, curated for PoPS
pathways.508	Membership in a pathway, curated for PoPS
pathways.509	Membership in a pathway, curated for PoPS
pathways.510	Membership in a pathway, curated for PoPS
pathways.511	Membership in a pathway, curated for PoPS
pathways.512	Membership in a pathway, curated for PoPS
pathways.513	Membership in a pathway, curated for PoPS
pathways.514	Membership in a pathway, curated for PoPS
pathways.515	Membership in a pathway, curated for PoPS
pathways.516	Membership in a pathway, curated for PoPS
pathways.517	Membership in a pathway, curated for PoPS
pathways.518	Membership in a pathway, curated for PoPS
pathways.519	Membership in a pathway, curated for PoPS
pathways.520	Membership in a pathway, curated for PoPS
pathways.521	Membership in a pathway, curated for PoPS
pathways.522	Membership in a pathway, curated for PoPS
pathways.523	Membership in a pathway, curated for PoPS
pathways.524	Membership in a pathway, curated for PoPS
pathways.525	Membership in a pathway, curated for PoPS
pathways.526	Membership in a pathway, curated for PoPS
pathways.527	Membership in a pathway, curated for PoPS
pathways.528	Membership in a pathway, curated for PoPS
pathways.529	Membership in a pathway, curated for PoPS
pathways.530	Membership in a pathway, curated for PoPS
pathways.531	Membership in a pathway, curated for PoPS
pathways.532	Membership in a pathway, curated for PoPS
pathways.533	Membership in a pathway, curated for PoPS
pathways.534	Membership in a pathway, curated for PoPS
pathways.535	Membership in a pathway, curated for PoPS
pathways.536	Membership in a pathway, curated for PoPS
pathways.537	Membership in a pathway, curated for PoPS
pathways.538	Membership in a pathway, curated for PoPS
pathways.539	Membership in a pathway, curated for PoPS
pathways.540	Membership in a pathway, curated for PoPS
pathways.541	Membership in a pathway, curated for PoPS
pathways.542	Membership in a pathway, curated for PoPS
pathways.543	Membership in a pathway, curated for PoPS
pathways.544	Membership in a pathway, curated for PoPS
pathways.545	Membership in a pathway, curated for PoPS
pathways.546	Membership in a pathway, curated for PoPS
pathways.547	Membership in a pathway, curated for PoPS
pathways.548	Membership in a pathway, curated for PoPS
pathways.549	Membership in a pathway, curated for PoPS
pathways.550	Membership in a pathway, curated for PoPS
pathways.551	Membership in a pathway, curated for PoPS
pathways.552	Membership in a pathway, curated for PoPS
pathways.553	Membership in a pathway, curated for PoPS
pathways.554	Membership in a pathway, curated for PoPS
pathways.555	Membership in a pathway, curated for PoPS
pathways.556	Membership in a pathway, curated for PoPS
pathways.557	Membership in a pathway, curated for PoPS
pathways.558	Membership in a pathway, curated for PoPS
pathways.559	Membership in a pathway, curated for PoPS
pathways.560	Membership in a pathway, curated for PoPS
pathways.561	Membership in a pathway, curated for PoPS
pathways.562	Membership in a pathway, curated for PoPS
pathways.563	Membership in a pathway, curated for PoPS
pathways.564	Membership in a pathway, curated for PoPS
pathways.565	Membership in a pathway, curated for PoPS
pathways.566	Membership in a pathway, curated for PoPS
pathways.567	Membership in a pathway, curated for PoPS
pathways.568	Membership in a pathway, curated for PoPS
pathways.569	Membership in a pathway, curated for PoPS
pathways.570	Membership in a pathway, curated for PoPS
pathways.571	Membership in a pathway, curated for PoPS
pathways.572	Membership in a pathway, curated for PoPS
pathways.573	Membership in a pathway, curated for PoPS
pathways.574	Membership in a pathway, curated for PoPS
pathways.575	Membership in a pathway, curated for PoPS
pathways.576	Membership in a pathway, curated for PoPS
pathways.577	Membership in a pathway, curated for PoPS
pathways.578	Membership in a pathway, curated for PoPS
pathways.579	Membership in a pathway, curated for PoPS
pathways.580	Membership in a pathway, curated for PoPS
pathways.581	Membership in a pathway, curated for PoPS
pathways.582	Membership in a pathway, curated for PoPS
pathways.583	Membership in a pathway, curated for PoPS
pathways.584	Membership in a pathway, curated for PoPS
pathways.585	Membership in a pathway, curated for PoPS
pathways.586	Membership in a pathway, curated for PoPS
pathways.587	Membership in a pathway, curated for PoPS
pathways.588	Membership in a pathway, curated for PoPS
pathways.589	Membership in a pathway, curated for PoPS
pathways.590	Membership in a pathway, curated for PoPS
pathways.591	Membership in a pathway, curated for PoPS
pathways.592	Membership in a pathway, curated for PoPS
pathways.593	Membership in a pathway, curated for PoPS
pathways.594	Membership in a pathway, curated for PoPS
pathways.595	Membership in a pathway, curated for PoPS
pathways.596	Membership in a pathway, curated for PoPS
pathways.597	Membership in a pathway, curated for PoPS
pathways.598	Membership in a pathway, curated for PoPS
pathways.599	Membership in a pathway, curated for PoPS
pathways.600	Membership in a pathway, curated for PoPS
pathways.601	Membership in a pathway, curated for PoPS
pathways.602	Membership in a pathway, curated for PoPS
pathways.603	Membership in a pathway, curated for PoPS
pathways.604	Membership in a pathway, curated for PoPS
pathways.605	Membership in a pathway, curated for PoPS
pathways.606	Membership in a pathway, curated for PoPS
pathways.607	Membership in a pathway, curated for PoPS
pathways.608	Membership in a pathway, curated for PoPS
pathways.609	Membership in a pathway, curated for PoPS
pathways.610	Membership in a pathway, curated for PoPS
pathways.611	Membership in a pathway, curated for PoPS
pathways.612	Membership in a pathway, curated for PoPS
pathways.613	Membership in a pathway, curated for PoPS
pathways.614	Membership in a pathway, curated for PoPS
pathways.615	Membership in a pathway, curated for PoPS
pathways.616	Membership in a pathway, curated for PoPS
pathways.617	Membership in a pathway, curated for PoPS
pathways.618	Membership in a pathway, curated for PoPS
pathways.619	Membership in a pathway, curated for PoPS
pathways.620	Membership in a pathway, curated for PoPS
pathways.621	Membership in a pathway, curated for PoPS
pathways.622	Membership in a pathway, curated for PoPS
pathways.623	Membership in a pathway, curated for PoPS
pathways.624	Membership in a pathway, curated for PoPS
pathways.625	Membership in a pathway, curated for PoPS
pathways.626	Membership in a pathway, curated for PoPS
pathways.627	Membership in a pathway, curated for PoPS
pathways.628	Membership in a pathway, curated for PoPS
pathways.629	Membership in a pathway, curated for PoPS
pathways.630	Membership in a pathway, curated for PoPS
pathways.631	Membership in a pathway, curated for PoPS
pathways.632	Membership in a pathway, curated for PoPS
pathways.633	Membership in a pathway, curated for PoPS
pathways.634	Membership in a pathway, curated for PoPS
pathways.635	Membership in a pathway, curated for PoPS
pathways.636	Membership in a pathway, curated for PoPS
pathways.637	Membership in a pathway, curated for PoPS
pathways.638	Membership in a pathway, curated for PoPS
pathways.639	Membership in a pathway, curated for PoPS
pathways.640	Membership in a pathway, curated for PoPS
pathways.641	Membership in a pathway, curated for PoPS
pathways.642	Membership in a pathway, curated for PoPS
pathways.643	Membership in a pathway, curated for PoPS
pathways.644	Membership in a pathway, curated for PoPS
pathways.645	Membership in a pathway, curated for PoPS
pathways.646	Membership in a pathway, curated for PoPS
pathways.647	Membership in a pathway, curated for PoPS
pathways.648	Membership in a pathway, curated for PoPS
pathways.649	Membership in a pathway, curated for PoPS
pathways.650	Membership in a pathway, curated for PoPS
pathways.651	Membership in a pathway, curated for PoPS
pathways.652	Membership in a pathway, curated for PoPS
pathways.653	Membership in a pathway, curated for PoPS
pathways.654	Membership in a pathway, curated for PoPS
pathways.655	Membership in a pathway, curated for PoPS
pathways.656	Membership in a pathway, curated for PoPS
pathways.657	Membership in a pathway, curated for PoPS
pathways.658	Membership in a pathway, curated for PoPS
pathways.659	Membership in a pathway, curated for PoPS
pathways.660	Membership in a pathway, curated for PoPS
pathways.661	Membership in a pathway, curated for PoPS
pathways.662	Membership in a pathway, curated for PoPS
pathways.663	Membership in a pathway, curated for PoPS
pathways.664	Membership in a pathway, curated for PoPS
pathways.665	Membership in a pathway, curated for PoPS
pathways.666	Membership in a pathway, curated for PoPS
pathways.667	Membership in a pathway, curated for PoPS
pathways.668	Membership in a pathway, curated for PoPS
pathways.669	Membership in a pathway, curated for PoPS
pathways.670	Membership in a pathway, curated for PoPS
pathways.671	Membership in a pathway, curated for PoPS
pathways.672	Membership in a pathway, curated for PoPS
pathways.673	Membership in a pathway, curated for PoPS
pathways.674	Membership in a pathway, curated for PoPS
pathways.675	Membership in a pathway, curated for PoPS
pathways.676	Membership in a pathway, curated for PoPS
pathways.677	Membership in a pathway, curated for PoPS
pathways.678	Membership in a pathway, curated for PoPS
pathways.679	Membership in a pathway, curated for PoPS
pathways.680	Membership in a pathway, curated for PoPS
pathways.681	Membership in a pathway, curated for PoPS
pathways.682	Membership in a pathway, curated for PoPS
pathways.683	Membership in a pathway, curated for PoPS
pathways.684	Membership in a pathway, curated for PoPS
pathways.685	Membership in a pathway, curated for PoPS
pathways.686	Membership in a pathway, curated for PoPS
pathways.687	Membership in a pathway, curated for PoPS
pathways.688	Membership in a pathway, curated for PoPS
pathways.689	Membership in a pathway, curated for PoPS
pathways.690	Membership in a pathway, curated for PoPS
pathways.691	Membership in a pathway, curated for PoPS
pathways.692	Membership in a pathway, curated for PoPS
pathways.693	Membership in a pathway, curated for PoPS
pathways.694	Membership in a pathway, curated for PoPS
pathways.695	Membership in a pathway, curated for PoPS
pathways.696	Membership in a pathway, curated for PoPS
pathways.697	Membership in a pathway, curated for PoPS
pathways.698	Membership in a pathway, curated for PoPS
pathways.699	Membership in a pathway, curated for PoPS
pathways.700	Membership in a pathway, curated for PoPS
pathways.701	Membership in a pathway, curated for PoPS
pathways.702	Membership in a pathway, curated for PoPS
pathways.703	Membership in a pathway, curated for PoPS
pathways.704	Membership in a pathway, curated for PoPS
pathways.705	Membership in a pathway, curated for PoPS
pathways.706	Membership in a pathway, curated for PoPS
pathways.707	Membership in a pathway, curated for PoPS
pathways.708	Membership in a pathway, curated for PoPS
pathways.709	Membership in a pathway, curated for PoPS
pathways.710	Membership in a pathway, curated for PoPS
pathways.711	Membership in a pathway, curated for PoPS
pathways.712	Membership in a pathway, curated for PoPS
pathways.713	Membership in a pathway, curated for PoPS
pathways.714	Membership in a pathway, curated for PoPS
pathways.715	Membership in a pathway, curated for PoPS
pathways.716	Membership in a pathway, curated for PoPS
pathways.717	Membership in a pathway, curated for PoPS
pathways.718	Membership in a pathway, curated for PoPS
pathways.719	Membership in a pathway, curated for PoPS
pathways.720	Membership in a pathway, curated for PoPS
pathways.721	Membership in a pathway, curated for PoPS
pathways.722	Membership in a pathway, curated for PoPS
pathways.723	Membership in a pathway, curated for PoPS
pathways.724	Membership in a pathway, curated for PoPS
pathways.725	Membership in a pathway, curated for PoPS
pathways.726	Membership in a pathway, curated for PoPS
pathways.727	Membership in a pathway, curated for PoPS
pathways.728	Membership in a pathway, curated for PoPS
pathways.729	Membership in a pathway, curated for PoPS
pathways.730	Membership in a pathway, curated for PoPS
pathways.731	Membership in a pathway, curated for PoPS
pathways.732	Membership in a pathway, curated for PoPS
pathways.733	Membership in a pathway, curated for PoPS
pathways.734	Membership in a pathway, curated for PoPS
pathways.735	Membership in a pathway, curated for PoPS
pathways.736	Membership in a pathway, curated for PoPS
pathways.737	Membership in a pathway, curated for PoPS
pathways.738	Membership in a pathway, curated for PoPS
pathways.739	Membership in a pathway, curated for PoPS
pathways.740	Membership in a pathway, curated for PoPS
pathways.741	Membership in a pathway, curated for PoPS
pathways.742	Membership in a pathway, curated for PoPS
pathways.743	Membership in a pathway, curated for PoPS
pathways.744	Membership in a pathway, curated for PoPS
pathways.745	Membership in a pathway, curated for PoPS
pathways.746	Membership in a pathway, curated for PoPS
pathways.747	Membership in a pathway, curated for PoPS
pathways.748	Membership in a pathway, curated for PoPS
pathways.749	Membership in a pathway, curated for PoPS
pathways.750	Membership in a pathway, curated for PoPS
pathways.751	Membership in a pathway, curated for PoPS
pathways.752	Membership in a pathway, curated for PoPS
pathways.753	Membership in a pathway, curated for PoPS
pathways.754	Membership in a pathway, curated for PoPS
pathways.755	Membership in a pathway, curated for PoPS
pathways.756	Membership in a pathway, curated for PoPS
pathways.757	Membership in a pathway, curated for PoPS
pathways.758	Membership in a pathway, curated for PoPS
pathways.759	Membership in a pathway, curated for PoPS
pathways.760	Membership in a pathway, curated for PoPS
pathways.761	Membership in a pathway, curated for PoPS
pathways.762	Membership in a pathway, curated for PoPS
pathways.763	Membership in a pathway, curated for PoPS
pathways.764	Membership in a pathway, curated for PoPS
pathways.765	Membership in a pathway, curated for PoPS
pathways.766	Membership in a pathway, curated for PoPS
pathways.767	Membership in a pathway, curated for PoPS
pathways.768	Membership in a pathway, curated for PoPS
pathways.769	Membership in a pathway, curated for PoPS
pathways.770	Membership in a pathway, curated for PoPS
pathways.771	Membership in a pathway, curated for PoPS
pathways.772	Membership in a pathway, curated for PoPS
pathways.773	Membership in a pathway, curated for PoPS
pathways.774	Membership in a pathway, curated for PoPS
pathways.775	Membership in a pathway, curated for PoPS
pathways.776	Membership in a pathway, curated for PoPS
pathways.777	Membership in a pathway, curated for PoPS
pathways.778	Membership in a pathway, curated for PoPS
pathways.779	Membership in a pathway, curated for PoPS
pathways.780	Membership in a pathway, curated for PoPS
pathways.781	Membership in a pathway, curated for PoPS
pathways.782	Membership in a pathway, curated for PoPS
pathways.783	Membership in a pathway, curated for PoPS
pathways.784	Membership in a pathway, curated for PoPS
pathways.785	Membership in a pathway, curated for PoPS
pathways.786	Membership in a pathway, curated for PoPS
pathways.787	Membership in a pathway, curated for PoPS
pathways.788	Membership in a pathway, curated for PoPS
pathways.789	Membership in a pathway, curated for PoPS
pathways.790	Membership in a pathway, curated for PoPS
pathways.791	Membership in a pathway, curated for PoPS
pathways.792	Membership in a pathway, curated for PoPS
pathways.793	Membership in a pathway, curated for PoPS
pathways.794	Membership in a pathway, curated for PoPS
pathways.795	Membership in a pathway, curated for PoPS
pathways.796	Membership in a pathway, curated for PoPS
pathways.797	Membership in a pathway, curated for PoPS
pathways.798	Membership in a pathway, curated for PoPS
pathways.799	Membership in a pathway, curated for PoPS
pathways.800	Membership in a pathway, curated for PoPS
pathways.801	Membership in a pathway, curated for PoPS
pathways.802	Membership in a pathway, curated for PoPS
pathways.803	Membership in a pathway, curated for PoPS
pathways.804	Membership in a pathway, curated for PoPS
pathways.805	Membership in a pathway, curated for PoPS
pathways.806	Membership in a pathway, curated for PoPS
pathways.807	Membership in a pathway, curated for PoPS
pathways.808	Membership in a pathway, curated for PoPS
pathways.809	Membership in a pathway, curated for PoPS
pathways.810	Membership in a pathway, curated for PoPS
pathways.811	Membership in a pathway, curated for PoPS
pathways.812	Membership in a pathway, curated for PoPS
pathways.813	Membership in a pathway, curated for PoPS
pathways.814	Membership in a pathway, curated for PoPS
pathways.815	Membership in a pathway, curated for PoPS
pathways.816	Membership in a pathway, curated for PoPS
pathways.817	Membership in a pathway, curated for PoPS
pathways.818	Membership in a pathway, curated for PoPS
pathways.819	Membership in a pathway, curated for PoPS
pathways.820	Membership in a pathway, curated for PoPS
pathways.821	Membership in a pathway, curated for PoPS
pathways.822	Membership in a pathway, curated for PoPS
pathways.823	Membership in a pathway, curated for PoPS
pathways.824	Membership in a pathway, curated for PoPS
pathways.825	Membership in a pathway, curated for PoPS
pathways.826	Membership in a pathway, curated for PoPS
pathways.827	Membership in a pathway, curated for PoPS
pathways.828	Membership in a pathway, curated for PoPS
pathways.829	Membership in a pathway, curated for PoPS
pathways.830	Membership in a pathway, curated for PoPS
pathways.831	Membership in a pathway, curated for PoPS
pathways.832	Membership in a pathway, curated for PoPS
pathways.833	Membership in a pathway, curated for PoPS
pathways.834	Membership in a pathway, curated for PoPS
pathways.835	Membership in a pathway, curated for PoPS
pathways.836	Membership in a pathway, curated for PoPS
pathways.837	Membership in a pathway, curated for PoPS
pathways.838	Membership in a pathway, curated for PoPS
pathways.839	Membership in a pathway, curated for PoPS
pathways.840	Membership in a pathway, curated for PoPS
pathways.841	Membership in a pathway, curated for PoPS
pathways.842	Membership in a pathway, curated for PoPS
pathways.843	Membership in a pathway, curated for PoPS
pathways.844	Membership in a pathway, curated for PoPS
pathways.845	Membership in a pathway, curated for PoPS
pathways.846	Membership in a pathway, curated for PoPS
pathways.847	Membership in a pathway, curated for PoPS
pathways.848	Membership in a pathway, curated for PoPS
pathways.849	Membership in a pathway, curated for PoPS
pathways.850	Membership in a pathway, curated for PoPS
pathways.851	Membership in a pathway, curated for PoPS
pathways.852	Membership in a pathway, curated for PoPS
pathways.853	Membership in a pathway, curated for PoPS
pathways.854	Membership in a pathway, curated for PoPS
pathways.855	Membership in a pathway, curated for PoPS
pathways.856	Membership in a pathway, curated for PoPS
pathways.857	Membership in a pathway, curated for PoPS
pathways.858	Membership in a pathway, curated for PoPS
pathways.859	Membership in a pathway, curated for PoPS
pathways.860	Membership in a pathway, curated for PoPS
pathways.861	Membership in a pathway, curated for PoPS
pathways.862	Membership in a pathway, curated for PoPS
pathways.863	Membership in a pathway, curated for PoPS
pathways.864	Membership in a pathway, curated for PoPS
pathways.865	Membership in a pathway, curated for PoPS
pathways.866	Membership in a pathway, curated for PoPS
pathways.867	Membership in a pathway, curated for PoPS
pathways.868	Membership in a pathway, curated for PoPS
pathways.869	Membership in a pathway, curated for PoPS
pathways.870	Membership in a pathway, curated for PoPS
pathways.871	Membership in a pathway, curated for PoPS
pathways.872	Membership in a pathway, curated for PoPS
pathways.873	Membership in a pathway, curated for PoPS
pathways.874	Membership in a pathway, curated for PoPS
pathways.875	Membership in a pathway, curated for PoPS
pathways.876	Membership in a pathway, curated for PoPS
pathways.877	Membership in a pathway, curated for PoPS
pathways.878	Membership in a pathway, curated for PoPS
pathways.879	Membership in a pathway, curated for PoPS
pathways.880	Membership in a pathway, curated for PoPS
pathways.881	Membership in a pathway, curated for PoPS
pathways.882	Membership in a pathway, curated for PoPS
pathways.883	Membership in a pathway, curated for PoPS
pathways.884	Membership in a pathway, curated for PoPS
pathways.885	Membership in a pathway, curated for PoPS
pathways.886	Membership in a pathway, curated for PoPS
pathways.887	Membership in a pathway, curated for PoPS
pathways.888	Membership in a pathway, curated for PoPS
pathways.889	Membership in a pathway, curated for PoPS
pathways.890	Membership in a pathway, curated for PoPS
pathways.891	Membership in a pathway, curated for PoPS
pathways.892	Membership in a pathway, curated for PoPS
pathways.893	Membership in a pathway, curated for PoPS
pathways.894	Membership in a pathway, curated for PoPS
pathways.895	Membership in a pathway, curated for PoPS
pathways.896	Membership in a pathway, curated for PoPS
pathways.897	Membership in a pathway, curated for PoPS
pathways.898	Membership in a pathway, curated for PoPS
pathways.899	Membership in a pathway, curated for PoPS
pathways.900	Membership in a pathway, curated for PoPS
pathways.901	Membership in a pathway, curated for PoPS
pathways.902	Membership in a pathway, curated for PoPS
pathways.903	Membership in a pathway, curated for PoPS
pathways.904	Membership in a pathway, curated for PoPS
pathways.905	Membership in a pathway, curated for PoPS
pathways.906	Membership in a pathway, curated for PoPS
pathways.907	Membership in a pathway, curated for PoPS
pathways.908	Membership in a pathway, curated for PoPS
pathways.909	Membership in a pathway, curated for PoPS
pathways.910	Membership in a pathway, curated for PoPS
pathways.911	Membership in a pathway, curated for PoPS
pathways.912	Membership in a pathway, curated for PoPS
pathways.913	Membership in a pathway, curated for PoPS
pathways.914	Membership in a pathway, curated for PoPS
pathways.915	Membership in a pathway, curated for PoPS
pathways.916	Membership in a pathway, curated for PoPS
pathways.917	Membership in a pathway, curated for PoPS
pathways.918	Membership in a pathway, curated for PoPS
pathways.919	Membership in a pathway, curated for PoPS
pathways.920	Membership in a pathway, curated for PoPS
pathways.921	Membership in a pathway, curated for PoPS
pathways.922	Membership in a pathway, curated for PoPS
pathways.923	Membership in a pathway, curated for PoPS
pathways.924	Membership in a pathway, curated for PoPS
pathways.925	Membership in a pathway, curated for PoPS
pathways.926	Membership in a pathway, curated for PoPS
pathways.927	Membership in a pathway, curated for PoPS
pathways.928	Membership in a pathway, curated for PoPS
pathways.929	Membership in a pathway, curated for PoPS
pathways.930	Membership in a pathway, curated for PoPS
pathways.931	Membership in a pathway, curated for PoPS
pathways.932	Membership in a pathway, curated for PoPS
pathways.933	Membership in a pathway, curated for PoPS
pathways.934	Membership in a pathway, curated for PoPS
pathways.935	Membership in a pathway, curated for PoPS
pathways.936	Membership in a pathway, curated for PoPS
pathways.937	Membership in a pathway, curated for PoPS
pathways.938	Membership in a pathway, curated for PoPS
pathways.939	Membership in a pathway, curated for PoPS
pathways.940	Membership in a pathway, curated for PoPS
pathways.941	Membership in a pathway, curated for PoPS
pathways.942	Membership in a pathway, curated for PoPS
pathways.943	Membership in a pathway, curated for PoPS
pathways.944	Membership in a pathway, curated for PoPS
pathways.945	Membership in a pathway, curated for PoPS
pathways.946	Membership in a pathway, curated for PoPS
pathways.947	Membership in a pathway, curated for PoPS
pathways.948	Membership in a pathway, curated for PoPS
pathways.949	Membership in a pathway, curated for PoPS
pathways.950	Membership in a pathway, curated for PoPS
pathways.951	Membership in a pathway, curated for PoPS
pathways.952	Membership in a pathway, curated for PoPS
pathways.953	Membership in a pathway, curated for PoPS
pathways.954	Membership in a pathway, curated for PoPS
pathways.955	Membership in a pathway, curated for PoPS
pathways.956	Membership in a pathway, curated for PoPS
pathways.957	Membership in a pathway, curated for PoPS
pathways.958	Membership in a pathway, curated for PoPS
pathways.959	Membership in a pathway, curated for PoPS
pathways.960	Membership in a pathway, curated for PoPS
pathways.961	Membership in a pathway, curated for PoPS
pathways.962	Membership in a pathway, curated for PoPS
pathways.963	Membership in a pathway, curated for PoPS
pathways.964	Membership in a pathway, curated for PoPS
pathways.965	Membership in a pathway, curated for PoPS
pathways.966	Membership in a pathway, curated for PoPS
pathways.967	Membership in a pathway, curated for PoPS
pathways.968	Membership in a pathway, curated for PoPS
pathways.969	Membership in a pathway, curated for PoPS
pathways.970	Membership in a pathway, curated for PoPS
pathways.971	Membership in a pathway, curated for PoPS
pathways.972	Membership in a pathway, curated for PoPS
pathways.973	Membership in a pathway, curated for PoPS
pathways.974	Membership in a pathway, curated for PoPS
pathways.975	Membership in a pathway, curated for PoPS
pathways.976	Membership in a pathway, curated for PoPS
pathways.977	Membership in a pathway, curated for PoPS
pathways.978	Membership in a pathway, curated for PoPS
pathways.979	Membership in a pathway, curated for PoPS
pathways.980	Membership in a pathway, curated for PoPS
pathways.981	Membership in a pathway, curated for PoPS
pathways.982	Membership in a pathway, curated for PoPS
pathways.983	Membership in a pathway, curated for PoPS
pathways.984	Membership in a pathway, curated for PoPS
pathways.985	Membership in a pathway, curated for PoPS
pathways.986	Membership in a pathway, curated for PoPS
pathways.987	Membership in a pathway, curated for PoPS
pathways.988	Membership in a pathway, curated for PoPS
pathways.989	Membership in a pathway, curated for PoPS
pathways.990	Membership in a pathway, curated for PoPS
pathways.991	Membership in a pathway, curated for PoPS
pathways.992	Membership in a pathway, curated for PoPS
pathways.993	Membership in a pathway, curated for PoPS
pathways.994	Membership in a pathway, curated for PoPS
pathways.995	Membership in a pathway, curated for PoPS
pathways.996	Membership in a pathway, curated for PoPS
pathways.997	Membership in a pathway, curated for PoPS
pathways.998	Membership in a pathway, curated for PoPS
pathways.999	Membership in a pathway, curated for PoPS
pathways.1000	Membership in a pathway, curated for PoPS
pathways.1001	Membership in a pathway, curated for PoPS
pathways.1002	Membership in a pathway, curated for PoPS
pathways.1003	Membership in a pathway, curated for PoPS
pathways.1004	Membership in a pathway, curated for PoPS
pathways.1005	Membership in a pathway, curated for PoPS
pathways.1006	Membership in a pathway, curated for PoPS
pathways.1007	Membership in a pathway, curated for PoPS
pathways.1008	Membership in a pathway, curated for PoPS
pathways.1009	Membership in a pathway, curated for PoPS
pathways.1010	Membership in a pathway, curated for PoPS
pathways.1011	Membership in a pathway, curated for PoPS
pathways.1012	Membership in a pathway, curated for PoPS
pathways.1013	Membership in a pathway, curated for PoPS
pathways.1014	Membership in a pathway, curated for PoPS
pathways.1015	Membership in a pathway, curated for PoPS
pathways.1016	Membership in a pathway, curated for PoPS
pathways.1017	Membership in a pathway, curated for PoPS
pathways.1018	Membership in a pathway, curated for PoPS
pathways.1019	Membership in a pathway, curated for PoPS
pathways.1020	Membership in a pathway, curated for PoPS
pathways.1021	Membership in a pathway, curated for PoPS
pathways.1022	Membership in a pathway, curated for PoPS
pathways.1023	Membership in a pathway, curated for PoPS
pathways.1024	Membership in a pathway, curated for PoPS
pathways.1025	Membership in a pathway, curated for PoPS
pathways.1026	Membership in a pathway, curated for PoPS
pathways.1027	Membership in a pathway, curated for PoPS
pathways.1028	Membership in a pathway, curated for PoPS
pathways.1029	Membership in a pathway, curated for PoPS
pathways.1030	Membership in a pathway, curated for PoPS
pathways.1031	Membership in a pathway, curated for PoPS
pathways.1032	Membership in a pathway, curated for PoPS
pathways.1033	Membership in a pathway, curated for PoPS
pathways.1034	Membership in a pathway, curated for PoPS
pathways.1035	Membership in a pathway, curated for PoPS
pathways.1036	Membership in a pathway, curated for PoPS
pathways.1037	Membership in a pathway, curated for PoPS
pathways.1038	Membership in a pathway, curated for PoPS
pathways.1039	Membership in a pathway, curated for PoPS
pathways.1040	Membership in a pathway, curated for PoPS
pathways.1041	Membership in a pathway, curated for PoPS
pathways.1042	Membership in a pathway, curated for PoPS
pathways.1043	Membership in a pathway, curated for PoPS
pathways.1044	Membership in a pathway, curated for PoPS
pathways.1045	Membership in a pathway, curated for PoPS
pathways.1046	Membership in a pathway, curated for PoPS
pathways.1047	Membership in a pathway, curated for PoPS
pathways.1048	Membership in a pathway, curated for PoPS
pathways.1049	Membership in a pathway, curated for PoPS
pathways.1050	Membership in a pathway, curated for PoPS
pathways.1051	Membership in a pathway, curated for PoPS
pathways.1052	Membership in a pathway, curated for PoPS
pathways.1053	Membership in a pathway, curated for PoPS
pathways.1054	Membership in a pathway, curated for PoPS
pathways.1055	Membership in a pathway, curated for PoPS
pathways.1056	Membership in a pathway, curated for PoPS
pathways.1057	Membership in a pathway, curated for PoPS
pathways.1058	Membership in a pathway, curated for PoPS
pathways.1059	Membership in a pathway, curated for PoPS
pathways.1060	Membership in a pathway, curated for PoPS
pathways.1061	Membership in a pathway, curated for PoPS
pathways.1062	Membership in a pathway, curated for PoPS
pathways.1063	Membership in a pathway, curated for PoPS
pathways.1064	Membership in a pathway, curated for PoPS
pathways.1065	Membership in a pathway, curated for PoPS
pathways.1066	Membership in a pathway, curated for PoPS
pathways.1067	Membership in a pathway, curated for PoPS
pathways.1068	Membership in a pathway, curated for PoPS
pathways.1069	Membership in a pathway, curated for PoPS
pathways.1070	Membership in a pathway, curated for PoPS
pathways.1071	Membership in a pathway, curated for PoPS
pathways.1072	Membership in a pathway, curated for PoPS
pathways.1073	Membership in a pathway, curated for PoPS
pathways.1074	Membership in a pathway, curated for PoPS
pathways.1075	Membership in a pathway, curated for PoPS
pathways.1076	Membership in a pathway, curated for PoPS
pathways.1077	Membership in a pathway, curated for PoPS
pathways.1078	Membership in a pathway, curated for PoPS
pathways.1079	Membership in a pathway, curated for PoPS
pathways.1080	Membership in a pathway, curated for PoPS
pathways.1081	Membership in a pathway, curated for PoPS
pathways.1082	Membership in a pathway, curated for PoPS
pathways.1083	Membership in a pathway, curated for PoPS
pathways.1084	Membership in a pathway, curated for PoPS
pathways.1085	Membership in a pathway, curated for PoPS
pathways.1086	Membership in a pathway, curated for PoPS
pathways.1087	Membership in a pathway, curated for PoPS
pathways.1088	Membership in a pathway, curated for PoPS
pathways.1089	Membership in a pathway, curated for PoPS
pathways.1090	Membership in a pathway, curated for PoPS
pathways.1091	Membership in a pathway, curated for PoPS
pathways.1092	Membership in a pathway, curated for PoPS
pathways.1093	Membership in a pathway, curated for PoPS
pathways.1094	Membership in a pathway, curated for PoPS
pathways.1095	Membership in a pathway, curated for PoPS
pathways.1096	Membership in a pathway, curated for PoPS
pathways.1097	Membership in a pathway, curated for PoPS
pathways.1098	Membership in a pathway, curated for PoPS
pathways.1099	Membership in a pathway, curated for PoPS
pathways.1100	Membership in a pathway, curated for PoPS
pathways.1101	Membership in a pathway, curated for PoPS
pathways.1102	Membership in a pathway, curated for PoPS
pathways.1103	Membership in a pathway, curated for PoPS
pathways.1104	Membership in a pathway, curated for PoPS
pathways.1105	Membership in a pathway, curated for PoPS
pathways.1106	Membership in a pathway, curated for PoPS
pathways.1107	Membership in a pathway, curated for PoPS
pathways.1108	Membership in a pathway, curated for PoPS
pathways.1109	Membership in a pathway, curated for PoPS
pathways.1110	Membership in a pathway, curated for PoPS
pathways.1111	Membership in a pathway, curated for PoPS
pathways.1112	Membership in a pathway, curated for PoPS
pathways.1113	Membership in a pathway, curated for PoPS
pathways.1114	Membership in a pathway, curated for PoPS
pathways.1115	Membership in a pathway, curated for PoPS
pathways.1116	Membership in a pathway, curated for PoPS
pathways.1117	Membership in a pathway, curated for PoPS
pathways.1118	Membership in a pathway, curated for PoPS
pathways.1119	Membership in a pathway, curated for PoPS
pathways.1120	Membership in a pathway, curated for PoPS
pathways.1121	Membership in a pathway, curated for PoPS
pathways.1122	Membership in a pathway, curated for PoPS
pathways.1123	Membership in a pathway, curated for PoPS
pathways.1124	Membership in a pathway, curated for PoPS
pathways.1125	Membership in a pathway, curated for PoPS
pathways.1126	Membership in a pathway, curated for PoPS
pathways.1127	Membership in a pathway, curated for PoPS
pathways.1128	Membership in a pathway, curated for PoPS
pathways.1129	Membership in a pathway, curated for PoPS
pathways.1130	Membership in a pathway, curated for PoPS
pathways.1131	Membership in a pathway, curated for PoPS
pathways.1132	Membership in a pathway, curated for PoPS
pathways.1133	Membership in a pathway, curated for PoPS
pathways.1134	Membership in a pathway, curated for PoPS
pathways.1135	Membership in a pathway, curated for PoPS
pathways.1136	Membership in a pathway, curated for PoPS
pathways.1137	Membership in a pathway, curated for PoPS
pathways.1138	Membership in a pathway, curated for PoPS
pathways.1139	Membership in a pathway, curated for PoPS
pathways.1140	Membership in a pathway, curated for PoPS
pathways.1141	Membership in a pathway, curated for PoPS
pathways.1142	Membership in a pathway, curated for PoPS
pathways.1143	Membership in a pathway, curated for PoPS
pathways.1144	Membership in a pathway, curated for PoPS
pathways.1145	Membership in a pathway, curated for PoPS
pathways.1146	Membership in a pathway, curated for PoPS
pathways.1147	Membership in a pathway, curated for PoPS
pathways.1148	Membership in a pathway, curated for PoPS
pathways.1149	Membership in a pathway, curated for PoPS
pathways.1150	Membership in a pathway, curated for PoPS
pathways.1151	Membership in a pathway, curated for PoPS
pathways.1152	Membership in a pathway, curated for PoPS
pathways.1153	Membership in a pathway, curated for PoPS
pathways.1154	Membership in a pathway, curated for PoPS
pathways.1155	Membership in a pathway, curated for PoPS
pathways.1156	Membership in a pathway, curated for PoPS
pathways.1157	Membership in a pathway, curated for PoPS
pathways.1158	Membership in a pathway, curated for PoPS
pathways.1159	Membership in a pathway, curated for PoPS
pathways.1160	Membership in a pathway, curated for PoPS
pathways.1161	Membership in a pathway, curated for PoPS
pathways.1162	Membership in a pathway, curated for PoPS
pathways.1163	Membership in a pathway, curated for PoPS
pathways.1164	Membership in a pathway, curated for PoPS
pathways.1165	Membership in a pathway, curated for PoPS
pathways.1166	Membership in a pathway, curated for PoPS
pathways.1167	Membership in a pathway, curated for PoPS
pathways.1168	Membership in a pathway, curated for PoPS
pathways.1169	Membership in a pathway, curated for PoPS
pathways.1170	Membership in a pathway, curated for PoPS
pathways.1171	Membership in a pathway, curated for PoPS
pathways.1172	Membership in a pathway, curated for PoPS
pathways.1173	Membership in a pathway, curated for PoPS
pathways.1174	Membership in a pathway, curated for PoPS
pathways.1175	Membership in a pathway, curated for PoPS
pathways.1176	Membership in a pathway, curated for PoPS
pathways.1177	Membership in a pathway, curated for PoPS
pathways.1178	Membership in a pathway, curated for PoPS
pathways.1179	Membership in a pathway, curated for PoPS
pathways.1180	Membership in a pathway, curated for PoPS
pathways.1181	Membership in a pathway, curated for PoPS
pathways.1182	Membership in a pathway, curated for PoPS
pathways.1183	Membership in a pathway, curated for PoPS
pathways.1184	Membership in a pathway, curated for PoPS
pathways.1185	Membership in a pathway, curated for PoPS
pathways.1186	Membership in a pathway, curated for PoPS
pathways.1187	Membership in a pathway, curated for PoPS
pathways.1188	Membership in a pathway, curated for PoPS
pathways.1189	Membership in a pathway, curated for PoPS
pathways.1190	Membership in a pathway, curated for PoPS
pathways.1191	Membership in a pathway, curated for PoPS
pathways.1192	Membership in a pathway, curated for PoPS
pathways.1193	Membership in a pathway, curated for PoPS
pathways.1194	Membership in a pathway, curated for PoPS
pathways.1195	Membership in a pathway, curated for PoPS
pathways.1196	Membership in a pathway, curated for PoPS
pathways.1197	Membership in a pathway, curated for PoPS
pathways.1198	Membership in a pathway, curated for PoPS
pathways.1199	Membership in a pathway, curated for PoPS
pathways.1200	Membership in a pathway, curated for PoPS
pathways.1201	Membership in a pathway, curated for PoPS
pathways.1202	Membership in a pathway, curated for PoPS
pathways.1203	Membership in a pathway, curated for PoPS
pathways.1204	Membership in a pathway, curated for PoPS
pathways.1205	Membership in a pathway, curated for PoPS
pathways.1206	Membership in a pathway, curated for PoPS
pathways.1207	Membership in a pathway, curated for PoPS
pathways.1208	Membership in a pathway, curated for PoPS
pathways.1209	Membership in a pathway, curated for PoPS
pathways.1210	Membership in a pathway, curated for PoPS
pathways.1211	Membership in a pathway, curated for PoPS
pathways.1212	Membership in a pathway, curated for PoPS
pathways.1213	Membership in a pathway, curated for PoPS
pathways.1214	Membership in a pathway, curated for PoPS
pathways.1215	Membership in a pathway, curated for PoPS
pathways.1216	Membership in a pathway, curated for PoPS
pathways.1217	Membership in a pathway, curated for PoPS
pathways.1218	Membership in a pathway, curated for PoPS
pathways.1219	Membership in a pathway, curated for PoPS
pathways.1220	Membership in a pathway, curated for PoPS
pathways.1221	Membership in a pathway, curated for PoPS
pathways.1222	Membership in a pathway, curated for PoPS
pathways.1223	Membership in a pathway, curated for PoPS
pathways.1224	Membership in a pathway, curated for PoPS
pathways.1225	Membership in a pathway, curated for PoPS
pathways.1226	Membership in a pathway, curated for PoPS
pathways.1227	Membership in a pathway, curated for PoPS
pathways.1228	Membership in a pathway, curated for PoPS
pathways.1229	Membership in a pathway, curated for PoPS
pathways.1230	Membership in a pathway, curated for PoPS
pathways.1231	Membership in a pathway, curated for PoPS
pathways.1232	Membership in a pathway, curated for PoPS
pathways.1233	Membership in a pathway, curated for PoPS
pathways.1234	Membership in a pathway, curated for PoPS
pathways.1235	Membership in a pathway, curated for PoPS
pathways.1236	Membership in a pathway, curated for PoPS
pathways.1237	Membership in a pathway, curated for PoPS
pathways.1238	Membership in a pathway, curated for PoPS
pathways.1239	Membership in a pathway, curated for PoPS
pathways.1240	Membership in a pathway, curated for PoPS
pathways.1241	Membership in a pathway, curated for PoPS
pathways.1242	Membership in a pathway, curated for PoPS
pathways.1243	Membership in a pathway, curated for PoPS
pathways.1244	Membership in a pathway, curated for PoPS
pathways.1245	Membership in a pathway, curated for PoPS
pathways.1246	Membership in a pathway, curated for PoPS
pathways.1247	Membership in a pathway, curated for PoPS
pathways.1248	Membership in a pathway, curated for PoPS
pathways.1249	Membership in a pathway, curated for PoPS
pathways.1250	Membership in a pathway, curated for PoPS
pathways.1251	Membership in a pathway, curated for PoPS
pathways.1252	Membership in a pathway, curated for PoPS
pathways.1253	Membership in a pathway, curated for PoPS
pathways.1254	Membership in a pathway, curated for PoPS
pathways.1255	Membership in a pathway, curated for PoPS
pathways.1256	Membership in a pathway, curated for PoPS
pathways.1257	Membership in a pathway, curated for PoPS
pathways.1258	Membership in a pathway, curated for PoPS
pathways.1259	Membership in a pathway, curated for PoPS
pathways.1260	Membership in a pathway, curated for PoPS
pathways.1261	Membership in a pathway, curated for PoPS
pathways.1262	Membership in a pathway, curated for PoPS
pathways.1263	Membership in a pathway, curated for PoPS
pathways.1264	Membership in a pathway, curated for PoPS
pathways.1265	Membership in a pathway, curated for PoPS
pathways.1266	Membership in a pathway, curated for PoPS
pathways.1267	Membership in a pathway, curated for PoPS
pathways.1268	Membership in a pathway, curated for PoPS
pathways.1269	Membership in a pathway, curated for PoPS
pathways.1270	Membership in a pathway, curated for PoPS
pathways.1271	Membership in a pathway, curated for PoPS
pathways.1272	Membership in a pathway, curated for PoPS
pathways.1273	Membership in a pathway, curated for PoPS
pathways.1274	Membership in a pathway, curated for PoPS
pathways.1275	Membership in a pathway, curated for PoPS
pathways.1276	Membership in a pathway, curated for PoPS
pathways.1277	Membership in a pathway, curated for PoPS
pathways.1278	Membership in a pathway, curated for PoPS
pathways.1279	Membership in a pathway, curated for PoPS
pathways.1280	Membership in a pathway, curated for PoPS
pathways.1281	Membership in a pathway, curated for PoPS
pathways.1282	Membership in a pathway, curated for PoPS
pathways.1283	Membership in a pathway, curated for PoPS
pathways.1284	Membership in a pathway, curated for PoPS
pathways.1285	Membership in a pathway, curated for PoPS
pathways.1286	Membership in a pathway, curated for PoPS
pathways.1287	Membership in a pathway, curated for PoPS
pathways.1288	Membership in a pathway, curated for PoPS
pathways.1289	Membership in a pathway, curated for PoPS
pathways.1290	Membership in a pathway, curated for PoPS
pathways.1291	Membership in a pathway, curated for PoPS
pathways.1292	Membership in a pathway, curated for PoPS
pathways.1293	Membership in a pathway, curated for PoPS
pathways.1294	Membership in a pathway, curated for PoPS
pathways.1295	Membership in a pathway, curated for PoPS
pathways.1296	Membership in a pathway, curated for PoPS
pathways.1297	Membership in a pathway, curated for PoPS
pathways.1298	Membership in a pathway, curated for PoPS
pathways.1299	Membership in a pathway, curated for PoPS
pathways.1300	Membership in a pathway, curated for PoPS
pathways.1301	Membership in a pathway, curated for PoPS
pathways.1302	Membership in a pathway, curated for PoPS
pathways.1303	Membership in a pathway, curated for PoPS
pathways.1304	Membership in a pathway, curated for PoPS
pathways.1305	Membership in a pathway, curated for PoPS
pathways.1306	Membership in a pathway, curated for PoPS
pathways.1307	Membership in a pathway, curated for PoPS
pathways.1308	Membership in a pathway, curated for PoPS
pathways.1309	Membership in a pathway, curated for PoPS
pathways.1310	Membership in a pathway, curated for PoPS
pathways.1311	Membership in a pathway, curated for PoPS
pathways.1312	Membership in a pathway, curated for PoPS
pathways.1313	Membership in a pathway, curated for PoPS
pathways.1314	Membership in a pathway, curated for PoPS
pathways.1315	Membership in a pathway, curated for PoPS
pathways.1316	Membership in a pathway, curated for PoPS
pathways.1317	Membership in a pathway, curated for PoPS
pathways.1318	Membership in a pathway, curated for PoPS
pathways.1319	Membership in a pathway, curated for PoPS
pathways.1320	Membership in a pathway, curated for PoPS
pathways.1321	Membership in a pathway, curated for PoPS
pathways.1322	Membership in a pathway, curated for PoPS
pathways.1323	Membership in a pathway, curated for PoPS
pathways.1324	Membership in a pathway, curated for PoPS
pathways.1325	Membership in a pathway, curated for PoPS
pathways.1326	Membership in a pathway, curated for PoPS
pathways.1327	Membership in a pathway, curated for PoPS
pathways.1328	Membership in a pathway, curated for PoPS
pathways.1329	Membership in a pathway, curated for PoPS
pathways.1330	Membership in a pathway, curated for PoPS
pathways.1331	Membership in a pathway, curated for PoPS
pathways.1332	Membership in a pathway, curated for PoPS
pathways.1333	Membership in a pathway, curated for PoPS
pathways.1334	Membership in a pathway, curated for PoPS
pathways.1335	Membership in a pathway, curated for PoPS
pathways.1336	Membership in a pathway, curated for PoPS
pathways.1337	Membership in a pathway, curated for PoPS
pathways.1338	Membership in a pathway, curated for PoPS
pathways.1339	Membership in a pathway, curated for PoPS
pathways.1340	Membership in a pathway, curated for PoPS
pathways.1341	Membership in a pathway, curated for PoPS
pathways.1342	Membership in a pathway, curated for PoPS
pathways.1343	Membership in a pathway, curated for PoPS
pathways.1344	Membership in a pathway, curated for PoPS
pathways.1345	Membership in a pathway, curated for PoPS
pathways.1346	Membership in a pathway, curated for PoPS
pathways.1347	Membership in a pathway, curated for PoPS
pathways.1348	Membership in a pathway, curated for PoPS
pathways.1349	Membership in a pathway, curated for PoPS
pathways.1350	Membership in a pathway, curated for PoPS
pathways.1351	Membership in a pathway, curated for PoPS
pathways.1352	Membership in a pathway, curated for PoPS
pathways.1353	Membership in a pathway, curated for PoPS
pathways.1354	Membership in a pathway, curated for PoPS
pathways.1355	Membership in a pathway, curated for PoPS
pathways.1356	Membership in a pathway, curated for PoPS
pathways.1357	Membership in a pathway, curated for PoPS
pathways.1358	Membership in a pathway, curated for PoPS
pathways.1359	Membership in a pathway, curated for PoPS
pathways.1360	Membership in a pathway, curated for PoPS
pathways.1361	Membership in a pathway, curated for PoPS
pathways.1362	Membership in a pathway, curated for PoPS
pathways.1363	Membership in a pathway, curated for PoPS
pathways.1364	Membership in a pathway, curated for PoPS
pathways.1365	Membership in a pathway, curated for PoPS
pathways.1366	Membership in a pathway, curated for PoPS
pathways.1367	Membership in a pathway, curated for PoPS
pathways.1368	Membership in a pathway, curated for PoPS
pathways.1369	Membership in a pathway, curated for PoPS
pathways.1370	Membership in a pathway, curated for PoPS
pathways.1371	Membership in a pathway, curated for PoPS
pathways.1372	Membership in a pathway, curated for PoPS
pathways.1373	Membership in a pathway, curated for PoPS
pathways.1374	Membership in a pathway, curated for PoPS
pathways.1375	Membership in a pathway, curated for PoPS
pathways.1376	Membership in a pathway, curated for PoPS
pathways.1377	Membership in a pathway, curated for PoPS
pathways.1378	Membership in a pathway, curated for PoPS
pathways.1379	Membership in a pathway, curated for PoPS
pathways.1380	Membership in a pathway, curated for PoPS
pathways.1381	Membership in a pathway, curated for PoPS
pathways.1382	Membership in a pathway, curated for PoPS
pathways.1383	Membership in a pathway, curated for PoPS
pathways.1384	Membership in a pathway, curated for PoPS
pathways.1385	Membership in a pathway, curated for PoPS
pathways.1386	Membership in a pathway, curated for PoPS
pathways.1387	Membership in a pathway, curated for PoPS
pathways.1388	Membership in a pathway, curated for PoPS
pathways.1389	Membership in a pathway, curated for PoPS
pathways.1390	Membership in a pathway, curated for PoPS
pathways.1391	Membership in a pathway, curated for PoPS
pathways.1392	Membership in a pathway, curated for PoPS
pathways.1393	Membership in a pathway, curated for PoPS
pathways.1394	Membership in a pathway, curated for PoPS
pathways.1395	Membership in a pathway, curated for PoPS
pathways.1396	Membership in a pathway, curated for PoPS
pathways.1397	Membership in a pathway, curated for PoPS
pathways.1398	Membership in a pathway, curated for PoPS
pathways.1399	Membership in a pathway, curated for PoPS
pathways.1400	Membership in a pathway, curated for PoPS
pathways.1401	Membership in a pathway, curated for PoPS
pathways.1402	Membership in a pathway, curated for PoPS
pathways.1403	Membership in a pathway, curated for PoPS
pathways.1404	Membership in a pathway, curated for PoPS
pathways.1405	Membership in a pathway, curated for PoPS
pathways.1406	Membership in a pathway, curated for PoPS
pathways.1407	Membership in a pathway, curated for PoPS
pathways.1408	Membership in a pathway, curated for PoPS
pathways.1409	Membership in a pathway, curated for PoPS
pathways.1410	Membership in a pathway, curated for PoPS
pathways.1411	Membership in a pathway, curated for PoPS
pathways.1412	Membership in a pathway, curated for PoPS
pathways.1413	Membership in a pathway, curated for PoPS
pathways.1414	Membership in a pathway, curated for PoPS
pathways.1415	Membership in a pathway, curated for PoPS
pathways.1416	Membership in a pathway, curated for PoPS
pathways.1417	Membership in a pathway, curated for PoPS
pathways.1418	Membership in a pathway, curated for PoPS
pathways.1419	Membership in a pathway, curated for PoPS
pathways.1420	Membership in a pathway, curated for PoPS
pathways.1421	Membership in a pathway, curated for PoPS
pathways.1422	Membership in a pathway, curated for PoPS
pathways.1423	Membership in a pathway, curated for PoPS
pathways.1424	Membership in a pathway, curated for PoPS
pathways.1425	Membership in a pathway, curated for PoPS
pathways.1426	Membership in a pathway, curated for PoPS
pathways.1427	Membership in a pathway, curated for PoPS
pathways.1428	Membership in a pathway, curated for PoPS
pathways.1429	Membership in a pathway, curated for PoPS
pathways.1430	Membership in a pathway, curated for PoPS
pathways.1431	Membership in a pathway, curated for PoPS
pathways.1432	Membership in a pathway, curated for PoPS
pathways.1433	Membership in a pathway, curated for PoPS
pathways.1434	Membership in a pathway, curated for PoPS
pathways.1435	Membership in a pathway, curated for PoPS
pathways.1436	Membership in a pathway, curated for PoPS
pathways.1437	Membership in a pathway, curated for PoPS
pathways.1438	Membership in a pathway, curated for PoPS
pathways.1439	Membership in a pathway, curated for PoPS
pathways.1440	Membership in a pathway, curated for PoPS
pathways.1441	Membership in a pathway, curated for PoPS
pathways.1442	Membership in a pathway, curated for PoPS
pathways.1443	Membership in a pathway, curated for PoPS
pathways.1444	Membership in a pathway, curated for PoPS
pathways.1445	Membership in a pathway, curated for PoPS
pathways.1446	Membership in a pathway, curated for PoPS
pathways.1447	Membership in a pathway, curated for PoPS
pathways.1448	Membership in a pathway, curated for PoPS
pathways.1449	Membership in a pathway, curated for PoPS
pathways.1450	Membership in a pathway, curated for PoPS
pathways.1451	Membership in a pathway, curated for PoPS
pathways.1452	Membership in a pathway, curated for PoPS
pathways.1453	Membership in a pathway, curated for PoPS
pathways.1454	Membership in a pathway, curated for PoPS
pathways.1455	Membership in a pathway, curated for PoPS
pathways.1456	Membership in a pathway, curated for PoPS
pathways.1457	Membership in a pathway, curated for PoPS
pathways.1458	Membership in a pathway, curated for PoPS
pathways.1459	Membership in a pathway, curated for PoPS
pathways.1460	Membership in a pathway, curated for PoPS
pathways.1461	Membership in a pathway, curated for PoPS
pathways.1462	Membership in a pathway, curated for PoPS
pathways.1463	Membership in a pathway, curated for PoPS
pathways.1464	Membership in a pathway, curated for PoPS
pathways.1465	Membership in a pathway, curated for PoPS
pathways.1466	Membership in a pathway, curated for PoPS
pathways.1467	Membership in a pathway, curated for PoPS
pathways.1468	Membership in a pathway, curated for PoPS
pathways.1469	Membership in a pathway, curated for PoPS
pathways.1470	Membership in a pathway, curated for PoPS
pathways.1471	Membership in a pathway, curated for PoPS
pathways.1472	Membership in a pathway, curated for PoPS
pathways.1473	Membership in a pathway, curated for PoPS
pathways.1474	Membership in a pathway, curated for PoPS
pathways.1475	Membership in a pathway, curated for PoPS
pathways.1476	Membership in a pathway, curated for PoPS
pathways.1477	Membership in a pathway, curated for PoPS
pathways.1478	Membership in a pathway, curated for PoPS
pathways.1479	Membership in a pathway, curated for PoPS
pathways.1480	Membership in a pathway, curated for PoPS
pathways.1481	Membership in a pathway, curated for PoPS
pathways.1482	Membership in a pathway, curated for PoPS
pathways.1483	Membership in a pathway, curated for PoPS
pathways.1484	Membership in a pathway, curated for PoPS
pathways.1485	Membership in a pathway, curated for PoPS
pathways.1486	Membership in a pathway, curated for PoPS
pathways.1487	Membership in a pathway, curated for PoPS
pathways.1488	Membership in a pathway, curated for PoPS
pathways.1489	Membership in a pathway, curated for PoPS
pathways.1490	Membership in a pathway, curated for PoPS
pathways.1491	Membership in a pathway, curated for PoPS
pathways.1492	Membership in a pathway, curated for PoPS
pathways.1493	Membership in a pathway, curated for PoPS
pathways.1494	Membership in a pathway, curated for PoPS
pathways.1495	Membership in a pathway, curated for PoPS
pathways.1496	Membership in a pathway, curated for PoPS
pathways.1497	Membership in a pathway, curated for PoPS
pathways.1498	Membership in a pathway, curated for PoPS
pathways.1499	Membership in a pathway, curated for PoPS
pathways.1500	Membership in a pathway, curated for PoPS
pathways.1501	Membership in a pathway, curated for PoPS
pathways.1502	Membership in a pathway, curated for PoPS
pathways.1503	Membership in a pathway, curated for PoPS
pathways.1504	Membership in a pathway, curated for PoPS
pathways.1505	Membership in a pathway, curated for PoPS
pathways.1506	Membership in a pathway, curated for PoPS
pathways.1507	Membership in a pathway, curated for PoPS
pathways.1508	Membership in a pathway, curated for PoPS
pathways.1509	Membership in a pathway, curated for PoPS
pathways.1510	Membership in a pathway, curated for PoPS
pathways.1511	Membership in a pathway, curated for PoPS
pathways.1512	Membership in a pathway, curated for PoPS
pathways.1513	Membership in a pathway, curated for PoPS
pathways.1514	Membership in a pathway, curated for PoPS
pathways.1515	Membership in a pathway, curated for PoPS
pathways.1516	Membership in a pathway, curated for PoPS
pathways.1517	Membership in a pathway, curated for PoPS
pathways.1518	Membership in a pathway, curated for PoPS
pathways.1519	Membership in a pathway, curated for PoPS
pathways.1520	Membership in a pathway, curated for PoPS
pathways.1521	Membership in a pathway, curated for PoPS
pathways.1522	Membership in a pathway, curated for PoPS
pathways.1523	Membership in a pathway, curated for PoPS
pathways.1524	Membership in a pathway, curated for PoPS
pathways.1525	Membership in a pathway, curated for PoPS
pathways.1526	Membership in a pathway, curated for PoPS
pathways.1527	Membership in a pathway, curated for PoPS
pathways.1528	Membership in a pathway, curated for PoPS
pathways.1529	Membership in a pathway, curated for PoPS
pathways.1530	Membership in a pathway, curated for PoPS
pathways.1531	Membership in a pathway, curated for PoPS
pathways.1532	Membership in a pathway, curated for PoPS
pathways.1533	Membership in a pathway, curated for PoPS
pathways.1534	Membership in a pathway, curated for PoPS
pathways.1535	Membership in a pathway, curated for PoPS
pathways.1536	Membership in a pathway, curated for PoPS
pathways.1537	Membership in a pathway, curated for PoPS
pathways.1538	Membership in a pathway, curated for PoPS
pathways.1539	Membership in a pathway, curated for PoPS
pathways.1540	Membership in a pathway, curated for PoPS
pathways.1541	Membership in a pathway, curated for PoPS
pathways.1542	Membership in a pathway, curated for PoPS
pathways.1543	Membership in a pathway, curated for PoPS
pathways.1544	Membership in a pathway, curated for PoPS
pathways.1545	Membership in a pathway, curated for PoPS
pathways.1546	Membership in a pathway, curated for PoPS
pathways.1547	Membership in a pathway, curated for PoPS
pathways.1548	Membership in a pathway, curated for PoPS
pathways.1549	Membership in a pathway, curated for PoPS
pathways.1550	Membership in a pathway, curated for PoPS
pathways.1551	Membership in a pathway, curated for PoPS
pathways.1552	Membership in a pathway, curated for PoPS
pathways.1553	Membership in a pathway, curated for PoPS
pathways.1554	Membership in a pathway, curated for PoPS
pathways.1555	Membership in a pathway, curated for PoPS
pathways.1556	Membership in a pathway, curated for PoPS
pathways.1557	Membership in a pathway, curated for PoPS
pathways.1558	Membership in a pathway, curated for PoPS
pathways.1559	Membership in a pathway, curated for PoPS
pathways.1560	Membership in a pathway, curated for PoPS
pathways.1561	Membership in a pathway, curated for PoPS
pathways.1562	Membership in a pathway, curated for PoPS
pathways.1563	Membership in a pathway, curated for PoPS
pathways.1564	Membership in a pathway, curated for PoPS
pathways.1565	Membership in a pathway, curated for PoPS
pathways.1566	Membership in a pathway, curated for PoPS
pathways.1567	Membership in a pathway, curated for PoPS
pathways.1568	Membership in a pathway, curated for PoPS
pathways.1569	Membership in a pathway, curated for PoPS
pathways.1570	Membership in a pathway, curated for PoPS
pathways.1571	Membership in a pathway, curated for PoPS
pathways.1572	Membership in a pathway, curated for PoPS
pathways.1573	Membership in a pathway, curated for PoPS
pathways.1574	Membership in a pathway, curated for PoPS
pathways.1575	Membership in a pathway, curated for PoPS
pathways.1576	Membership in a pathway, curated for PoPS
pathways.1577	Membership in a pathway, curated for PoPS
pathways.1578	Membership in a pathway, curated for PoPS
pathways.1579	Membership in a pathway, curated for PoPS
pathways.1580	Membership in a pathway, curated for PoPS
pathways.1581	Membership in a pathway, curated for PoPS
pathways.1582	Membership in a pathway, curated for PoPS
pathways.1583	Membership in a pathway, curated for PoPS
pathways.1584	Membership in a pathway, curated for PoPS
pathways.1585	Membership in a pathway, curated for PoPS
pathways.1586	Membership in a pathway, curated for PoPS
pathways.1587	Membership in a pathway, curated for PoPS
pathways.1588	Membership in a pathway, curated for PoPS
pathways.1589	Membership in a pathway, curated for PoPS
pathways.1590	Membership in a pathway, curated for PoPS
pathways.1591	Membership in a pathway, curated for PoPS
pathways.1592	Membership in a pathway, curated for PoPS
pathways.1593	Membership in a pathway, curated for PoPS
pathways.1594	Membership in a pathway, curated for PoPS
pathways.1595	Membership in a pathway, curated for PoPS
pathways.1596	Membership in a pathway, curated for PoPS
pathways.1597	Membership in a pathway, curated for PoPS
pathways.1598	Membership in a pathway, curated for PoPS
pathways.1599	Membership in a pathway, curated for PoPS
pathways.1600	Membership in a pathway, curated for PoPS
pathways.1601	Membership in a pathway, curated for PoPS
pathways.1602	Membership in a pathway, curated for PoPS
pathways.1603	Membership in a pathway, curated for PoPS
pathways.1604	Membership in a pathway, curated for PoPS
pathways.1605	Membership in a pathway, curated for PoPS
pathways.1606	Membership in a pathway, curated for PoPS
pathways.1607	Membership in a pathway, curated for PoPS
pathways.1608	Membership in a pathway, curated for PoPS
pathways.1609	Membership in a pathway, curated for PoPS
pathways.1610	Membership in a pathway, curated for PoPS
pathways.1611	Membership in a pathway, curated for PoPS
pathways.1612	Membership in a pathway, curated for PoPS
pathways.1613	Membership in a pathway, curated for PoPS
pathways.1614	Membership in a pathway, curated for PoPS
pathways.1615	Membership in a pathway, curated for PoPS
pathways.1616	Membership in a pathway, curated for PoPS
pathways.1617	Membership in a pathway, curated for PoPS
pathways.1618	Membership in a pathway, curated for PoPS
pathways.1619	Membership in a pathway, curated for PoPS
pathways.1620	Membership in a pathway, curated for PoPS
pathways.1621	Membership in a pathway, curated for PoPS
pathways.1622	Membership in a pathway, curated for PoPS
pathways.1623	Membership in a pathway, curated for PoPS
pathways.1624	Membership in a pathway, curated for PoPS
pathways.1625	Membership in a pathway, curated for PoPS
pathways.1626	Membership in a pathway, curated for PoPS
pathways.1627	Membership in a pathway, curated for PoPS
pathways.1628	Membership in a pathway, curated for PoPS
pathways.1629	Membership in a pathway, curated for PoPS
pathways.1630	Membership in a pathway, curated for PoPS
pathways.1631	Membership in a pathway, curated for PoPS
pathways.1632	Membership in a pathway, curated for PoPS
pathways.1633	Membership in a pathway, curated for PoPS
pathways.1634	Membership in a pathway, curated for PoPS
pathways.1635	Membership in a pathway, curated for PoPS
pathways.1636	Membership in a pathway, curated for PoPS
pathways.1637	Membership in a pathway, curated for PoPS
pathways.1638	Membership in a pathway, curated for PoPS
pathways.1639	Membership in a pathway, curated for PoPS
pathways.1640	Membership in a pathway, curated for PoPS
pathways.1641	Membership in a pathway, curated for PoPS
pathways.1642	Membership in a pathway, curated for PoPS
pathways.1643	Membership in a pathway, curated for PoPS
pathways.1644	Membership in a pathway, curated for PoPS
pathways.1645	Membership in a pathway, curated for PoPS
pathways.1646	Membership in a pathway, curated for PoPS
pathways.1647	Membership in a pathway, curated for PoPS
pathways.1648	Membership in a pathway, curated for PoPS
pathways.1649	Membership in a pathway, curated for PoPS
pathways.1650	Membership in a pathway, curated for PoPS
pathways.1651	Membership in a pathway, curated for PoPS
pathways.1652	Membership in a pathway, curated for PoPS
pathways.1653	Membership in a pathway, curated for PoPS
pathways.1654	Membership in a pathway, curated for PoPS
pathways.1655	Membership in a pathway, curated for PoPS
pathways.1656	Membership in a pathway, curated for PoPS
pathways.1657	Membership in a pathway, curated for PoPS
pathways.1658	Membership in a pathway, curated for PoPS
pathways.1659	Membership in a pathway, curated for PoPS
pathways.1660	Membership in a pathway, curated for PoPS
pathways.1661	Membership in a pathway, curated for PoPS
pathways.1662	Membership in a pathway, curated for PoPS
pathways.1663	Membership in a pathway, curated for PoPS
pathways.1664	Membership in a pathway, curated for PoPS
pathways.1665	Membership in a pathway, curated for PoPS
pathways.1666	Membership in a pathway, curated for PoPS
pathways.1667	Membership in a pathway, curated for PoPS
pathways.1668	Membership in a pathway, curated for PoPS
pathways.1669	Membership in a pathway, curated for PoPS
pathways.1670	Membership in a pathway, curated for PoPS
pathways.1671	Membership in a pathway, curated for PoPS
pathways.1672	Membership in a pathway, curated for PoPS
pathways.1673	Membership in a pathway, curated for PoPS
pathways.1674	Membership in a pathway, curated for PoPS
pathways.1675	Membership in a pathway, curated for PoPS
pathways.1676	Membership in a pathway, curated for PoPS
pathways.1677	Membership in a pathway, curated for PoPS
pathways.1678	Membership in a pathway, curated for PoPS
pathways.1679	Membership in a pathway, curated for PoPS
pathways.1680	Membership in a pathway, curated for PoPS
pathways.1681	Membership in a pathway, curated for PoPS
pathways.1682	Membership in a pathway, curated for PoPS
pathways.1683	Membership in a pathway, curated for PoPS
pathways.1684	Membership in a pathway, curated for PoPS
pathways.1685	Membership in a pathway, curated for PoPS
pathways.1686	Membership in a pathway, curated for PoPS
pathways.1687	Membership in a pathway, curated for PoPS
pathways.1688	Membership in a pathway, curated for PoPS
pathways.1689	Membership in a pathway, curated for PoPS
pathways.1690	Membership in a pathway, curated for PoPS
pathways.1691	Membership in a pathway, curated for PoPS
pathways.1692	Membership in a pathway, curated for PoPS
pathways.1693	Membership in a pathway, curated for PoPS
pathways.1694	Membership in a pathway, curated for PoPS
pathways.1695	Membership in a pathway, curated for PoPS
pathways.1696	Membership in a pathway, curated for PoPS
pathways.1697	Membership in a pathway, curated for PoPS
pathways.1698	Membership in a pathway, curated for PoPS
pathways.1699	Membership in a pathway, curated for PoPS
pathways.1700	Membership in a pathway, curated for PoPS
pathways.1701	Membership in a pathway, curated for PoPS
pathways.1702	Membership in a pathway, curated for PoPS
pathways.1703	Membership in a pathway, curated for PoPS
pathways.1704	Membership in a pathway, curated for PoPS
pathways.1705	Membership in a pathway, curated for PoPS
pathways.1706	Membership in a pathway, curated for PoPS
pathways.1707	Membership in a pathway, curated for PoPS
pathways.1708	Membership in a pathway, curated for PoPS
pathways.1709	Membership in a pathway, curated for PoPS
pathways.1710	Membership in a pathway, curated for PoPS
pathways.1711	Membership in a pathway, curated for PoPS
pathways.1712	Membership in a pathway, curated for PoPS
pathways.1713	Membership in a pathway, curated for PoPS
pathways.1714	Membership in a pathway, curated for PoPS
pathways.1715	Membership in a pathway, curated for PoPS
pathways.1716	Membership in a pathway, curated for PoPS
pathways.1717	Membership in a pathway, curated for PoPS
pathways.1718	Membership in a pathway, curated for PoPS
pathways.1719	Membership in a pathway, curated for PoPS
pathways.1720	Membership in a pathway, curated for PoPS
pathways.1721	Membership in a pathway, curated for PoPS
pathways.1722	Membership in a pathway, curated for PoPS
pathways.1723	Membership in a pathway, curated for PoPS
pathways.1724	Membership in a pathway, curated for PoPS
pathways.1725	Membership in a pathway, curated for PoPS
pathways.1726	Membership in a pathway, curated for PoPS
pathways.1727	Membership in a pathway, curated for PoPS
pathways.1728	Membership in a pathway, curated for PoPS
pathways.1729	Membership in a pathway, curated for PoPS
pathways.1730	Membership in a pathway, curated for PoPS
pathways.1731	Membership in a pathway, curated for PoPS
pathways.1732	Membership in a pathway, curated for PoPS
pathways.1733	Membership in a pathway, curated for PoPS
pathways.1734	Membership in a pathway, curated for PoPS
pathways.1735	Membership in a pathway, curated for PoPS
pathways.1736	Membership in a pathway, curated for PoPS
pathways.1737	Membership in a pathway, curated for PoPS
pathways.1738	Membership in a pathway, curated for PoPS
pathways.1739	Membership in a pathway, curated for PoPS
pathways.1740	Membership in a pathway, curated for PoPS
pathways.1741	Membership in a pathway, curated for PoPS
pathways.1742	Membership in a pathway, curated for PoPS
pathways.1743	Membership in a pathway, curated for PoPS
pathways.1744	Membership in a pathway, curated for PoPS
pathways.1745	Membership in a pathway, curated for PoPS
pathways.1746	Membership in a pathway, curated for PoPS
pathways.1747	Membership in a pathway, curated for PoPS
pathways.1748	Membership in a pathway, curated for PoPS
pathways.1749	Membership in a pathway, curated for PoPS
pathways.1750	Membership in a pathway, curated for PoPS
pathways.1751	Membership in a pathway, curated for PoPS
pathways.1752	Membership in a pathway, curated for PoPS
pathways.1753	Membership in a pathway, curated for PoPS
pathways.1754	Membership in a pathway, curated for PoPS
pathways.1755	Membership in a pathway, curated for PoPS
pathways.1756	Membership in a pathway, curated for PoPS
pathways.1757	Membership in a pathway, curated for PoPS
pathways.1758	Membership in a pathway, curated for PoPS
pathways.1759	Membership in a pathway, curated for PoPS
pathways.1760	Membership in a pathway, curated for PoPS
pathways.1761	Membership in a pathway, curated for PoPS
pathways.1762	Membership in a pathway, curated for PoPS
pathways.1763	Membership in a pathway, curated for PoPS
pathways.1764	Membership in a pathway, curated for PoPS
pathways.1765	Membership in a pathway, curated for PoPS
pathways.1766	Membership in a pathway, curated for PoPS
pathways.1767	Membership in a pathway, curated for PoPS
pathways.1768	Membership in a pathway, curated for PoPS
pathways.1769	Membership in a pathway, curated for PoPS
pathways.1770	Membership in a pathway, curated for PoPS
pathways.1771	Membership in a pathway, curated for PoPS
pathways.1772	Membership in a pathway, curated for PoPS
pathways.1773	Membership in a pathway, curated for PoPS
pathways.1774	Membership in a pathway, curated for PoPS
pathways.1775	Membership in a pathway, curated for PoPS
pathways.1776	Membership in a pathway, curated for PoPS
pathways.1777	Membership in a pathway, curated for PoPS
pathways.1778	Membership in a pathway, curated for PoPS
pathways.1779	Membership in a pathway, curated for PoPS
pathways.1780	Membership in a pathway, curated for PoPS
pathways.1781	Membership in a pathway, curated for PoPS
pathways.1782	Membership in a pathway, curated for PoPS
pathways.1783	Membership in a pathway, curated for PoPS
pathways.1784	Membership in a pathway, curated for PoPS
pathways.1785	Membership in a pathway, curated for PoPS
pathways.1786	Membership in a pathway, curated for PoPS
pathways.1787	Membership in a pathway, curated for PoPS
pathways.1788	Membership in a pathway, curated for PoPS
pathways.1789	Membership in a pathway, curated for PoPS
pathways.1790	Membership in a pathway, curated for PoPS
pathways.1791	Membership in a pathway, curated for PoPS
pathways.1792	Membership in a pathway, curated for PoPS
pathways.1793	Membership in a pathway, curated for PoPS
pathways.1794	Membership in a pathway, curated for PoPS
pathways.1795	Membership in a pathway, curated for PoPS
pathways.1796	Membership in a pathway, curated for PoPS
pathways.1797	Membership in a pathway, curated for PoPS
pathways.1798	Membership in a pathway, curated for PoPS
pathways.1799	Membership in a pathway, curated for PoPS
pathways.1800	Membership in a pathway, curated for PoPS
pathways.1801	Membership in a pathway, curated for PoPS
pathways.1802	Membership in a pathway, curated for PoPS
pathways.1803	Membership in a pathway, curated for PoPS
pathways.1804	Membership in a pathway, curated for PoPS
pathways.1805	Membership in a pathway, curated for PoPS
pathways.1806	Membership in a pathway, curated for PoPS
pathways.1807	Membership in a pathway, curated for PoPS
pathways.1808	Membership in a pathway, curated for PoPS
pathways.1809	Membership in a pathway, curated for PoPS
pathways.1810	Membership in a pathway, curated for PoPS
pathways.1811	Membership in a pathway, curated for PoPS
pathways.1812	Membership in a pathway, curated for PoPS
pathways.1813	Membership in a pathway, curated for PoPS
pathways.1814	Membership in a pathway, curated for PoPS
pathways.1815	Membership in a pathway, curated for PoPS
pathways.1816	Membership in a pathway, curated for PoPS
pathways.1817	Membership in a pathway, curated for PoPS
pathways.1818	Membership in a pathway, curated for PoPS
pathways.1819	Membership in a pathway, curated for PoPS
pathways.1820	Membership in a pathway, curated for PoPS
pathways.1821	Membership in a pathway, curated for PoPS
pathways.1822	Membership in a pathway, curated for PoPS
pathways.1823	Membership in a pathway, curated for PoPS
pathways.1824	Membership in a pathway, curated for PoPS
pathways.1825	Membership in a pathway, curated for PoPS
pathways.1826	Membership in a pathway, curated for PoPS
pathways.1827	Membership in a pathway, curated for PoPS
pathways.1828	Membership in a pathway, curated for PoPS
pathways.1829	Membership in a pathway, curated for PoPS
pathways.1830	Membership in a pathway, curated for PoPS
pathways.1831	Membership in a pathway, curated for PoPS
pathways.1832	Membership in a pathway, curated for PoPS
pathways.1833	Membership in a pathway, curated for PoPS
pathways.1834	Membership in a pathway, curated for PoPS
pathways.1835	Membership in a pathway, curated for PoPS
pathways.1836	Membership in a pathway, curated for PoPS
pathways.1837	Membership in a pathway, curated for PoPS
pathways.1838	Membership in a pathway, curated for PoPS
pathways.1839	Membership in a pathway, curated for PoPS
pathways.1840	Membership in a pathway, curated for PoPS
pathways.1841	Membership in a pathway, curated for PoPS
pathways.1842	Membership in a pathway, curated for PoPS
pathways.1843	Membership in a pathway, curated for PoPS
pathways.1844	Membership in a pathway, curated for PoPS
pathways.1845	Membership in a pathway, curated for PoPS
pathways.1846	Membership in a pathway, curated for PoPS
pathways.1847	Membership in a pathway, curated for PoPS
pathways.1848	Membership in a pathway, curated for PoPS
pathways.1849	Membership in a pathway, curated for PoPS
pathways.1850	Membership in a pathway, curated for PoPS
pathways.1851	Membership in a pathway, curated for PoPS
pathways.1852	Membership in a pathway, curated for PoPS
pathways.1853	Membership in a pathway, curated for PoPS
pathways.1854	Membership in a pathway, curated for PoPS
pathways.1855	Membership in a pathway, curated for PoPS
pathways.1856	Membership in a pathway, curated for PoPS
pathways.1857	Membership in a pathway, curated for PoPS
pathways.1858	Membership in a pathway, curated for PoPS
pathways.1859	Membership in a pathway, curated for PoPS
pathways.1860	Membership in a pathway, curated for PoPS
pathways.1861	Membership in a pathway, curated for PoPS
pathways.1862	Membership in a pathway, curated for PoPS
pathways.1863	Membership in a pathway, curated for PoPS
pathways.1864	Membership in a pathway, curated for PoPS
pathways.1865	Membership in a pathway, curated for PoPS
pathways.1866	Membership in a pathway, curated for PoPS
pathways.1867	Membership in a pathway, curated for PoPS
pathways.1868	Membership in a pathway, curated for PoPS
pathways.1869	Membership in a pathway, curated for PoPS
pathways.1870	Membership in a pathway, curated for PoPS
pathways.1871	Membership in a pathway, curated for PoPS
pathways.1872	Membership in a pathway, curated for PoPS
pathways.1873	Membership in a pathway, curated for PoPS
pathways.1874	Membership in a pathway, curated for PoPS
pathways.1875	Membership in a pathway, curated for PoPS
pathways.1876	Membership in a pathway, curated for PoPS
pathways.1877	Membership in a pathway, curated for PoPS
pathways.1878	Membership in a pathway, curated for PoPS
pathways.1879	Membership in a pathway, curated for PoPS
pathways.1880	Membership in a pathway, curated for PoPS
pathways.1881	Membership in a pathway, curated for PoPS
pathways.1882	Membership in a pathway, curated for PoPS
pathways.1883	Membership in a pathway, curated for PoPS
pathways.1884	Membership in a pathway, curated for PoPS
pathways.1885	Membership in a pathway, curated for PoPS
pathways.1886	Membership in a pathway, curated for PoPS
pathways.1887	Membership in a pathway, curated for PoPS
pathways.1888	Membership in a pathway, curated for PoPS
pathways.1889	Membership in a pathway, curated for PoPS
pathways.1890	Membership in a pathway, curated for PoPS
pathways.1891	Membership in a pathway, curated for PoPS
pathways.1892	Membership in a pathway, curated for PoPS
pathways.1893	Membership in a pathway, curated for PoPS
pathways.1894	Membership in a pathway, curated for PoPS
pathways.1895	Membership in a pathway, curated for PoPS
pathways.1896	Membership in a pathway, curated for PoPS
pathways.1897	Membership in a pathway, curated for PoPS
pathways.1898	Membership in a pathway, curated for PoPS
pathways.1899	Membership in a pathway, curated for PoPS
pathways.1900	Membership in a pathway, curated for PoPS
pathways.1901	Membership in a pathway, curated for PoPS
pathways.1902	Membership in a pathway, curated for PoPS
pathways.1903	Membership in a pathway, curated for PoPS
pathways.1904	Membership in a pathway, curated for PoPS
pathways.1905	Membership in a pathway, curated for PoPS
pathways.1906	Membership in a pathway, curated for PoPS
pathways.1907	Membership in a pathway, curated for PoPS
pathways.1908	Membership in a pathway, curated for PoPS
pathways.1909	Membership in a pathway, curated for PoPS
pathways.1910	Membership in a pathway, curated for PoPS
pathways.1911	Membership in a pathway, curated for PoPS
pathways.1912	Membership in a pathway, curated for PoPS
pathways.1913	Membership in a pathway, curated for PoPS
pathways.1914	Membership in a pathway, curated for PoPS
pathways.1915	Membership in a pathway, curated for PoPS
pathways.1916	Membership in a pathway, curated for PoPS
pathways.1917	Membership in a pathway, curated for PoPS
pathways.1918	Membership in a pathway, curated for PoPS
pathways.1919	Membership in a pathway, curated for PoPS
pathways.1920	Membership in a pathway, curated for PoPS
pathways.1921	Membership in a pathway, curated for PoPS
pathways.1922	Membership in a pathway, curated for PoPS
pathways.1923	Membership in a pathway, curated for PoPS
pathways.1924	Membership in a pathway, curated for PoPS
pathways.1925	Membership in a pathway, curated for PoPS
pathways.1926	Membership in a pathway, curated for PoPS
pathways.1927	Membership in a pathway, curated for PoPS
pathways.1928	Membership in a pathway, curated for PoPS
pathways.1929	Membership in a pathway, curated for PoPS
pathways.1930	Membership in a pathway, curated for PoPS
pathways.1931	Membership in a pathway, curated for PoPS
pathways.1932	Membership in a pathway, curated for PoPS
pathways.1933	Membership in a pathway, curated for PoPS
pathways.1934	Membership in a pathway, curated for PoPS
pathways.1935	Membership in a pathway, curated for PoPS
pathways.1936	Membership in a pathway, curated for PoPS
pathways.1937	Membership in a pathway, curated for PoPS
pathways.1938	Membership in a pathway, curated for PoPS
pathways.1939	Membership in a pathway, curated for PoPS
pathways.1940	Membership in a pathway, curated for PoPS
pathways.1941	Membership in a pathway, curated for PoPS
pathways.1942	Membership in a pathway, curated for PoPS
pathways.1943	Membership in a pathway, curated for PoPS
pathways.1944	Membership in a pathway, curated for PoPS
pathways.1945	Membership in a pathway, curated for PoPS
pathways.1946	Membership in a pathway, curated for PoPS
pathways.1947	Membership in a pathway, curated for PoPS
pathways.1948	Membership in a pathway, curated for PoPS
pathways.1949	Membership in a pathway, curated for PoPS
pathways.1950	Membership in a pathway, curated for PoPS
pathways.1951	Membership in a pathway, curated for PoPS
pathways.1952	Membership in a pathway, curated for PoPS
pathways.1953	Membership in a pathway, curated for PoPS
pathways.1954	Membership in a pathway, curated for PoPS
pathways.1955	Membership in a pathway, curated for PoPS
pathways.1956	Membership in a pathway, curated for PoPS
pathways.1957	Membership in a pathway, curated for PoPS
pathways.1958	Membership in a pathway, curated for PoPS
pathways.1959	Membership in a pathway, curated for PoPS
pathways.1960	Membership in a pathway, curated for PoPS
pathways.1961	Membership in a pathway, curated for PoPS
pathways.1962	Membership in a pathway, curated for PoPS
pathways.1963	Membership in a pathway, curated for PoPS
pathways.1964	Membership in a pathway, curated for PoPS
pathways.1965	Membership in a pathway, curated for PoPS
pathways.1966	Membership in a pathway, curated for PoPS
pathways.1967	Membership in a pathway, curated for PoPS
pathways.1968	Membership in a pathway, curated for PoPS
pathways.1969	Membership in a pathway, curated for PoPS
pathways.1970	Membership in a pathway, curated for PoPS
pathways.1971	Membership in a pathway, curated for PoPS
pathways.1972	Membership in a pathway, curated for PoPS
pathways.1973	Membership in a pathway, curated for PoPS
pathways.1974	Membership in a pathway, curated for PoPS
pathways.1975	Membership in a pathway, curated for PoPS
pathways.1976	Membership in a pathway, curated for PoPS
pathways.1977	Membership in a pathway, curated for PoPS
pathways.1978	Membership in a pathway, curated for PoPS
pathways.1979	Membership in a pathway, curated for PoPS
pathways.1980	Membership in a pathway, curated for PoPS
pathways.1981	Membership in a pathway, curated for PoPS
pathways.1982	Membership in a pathway, curated for PoPS
pathways.1983	Membership in a pathway, curated for PoPS
pathways.1984	Membership in a pathway, curated for PoPS
pathways.1985	Membership in a pathway, curated for PoPS
pathways.1986	Membership in a pathway, curated for PoPS
pathways.1987	Membership in a pathway, curated for PoPS
pathways.1988	Membership in a pathway, curated for PoPS
pathways.1989	Membership in a pathway, curated for PoPS
pathways.1990	Membership in a pathway, curated for PoPS
pathways.1991	Membership in a pathway, curated for PoPS
pathways.1992	Membership in a pathway, curated for PoPS
pathways.1993	Membership in a pathway, curated for PoPS
pathways.1994	Membership in a pathway, curated for PoPS
pathways.1995	Membership in a pathway, curated for PoPS
pathways.1996	Membership in a pathway, curated for PoPS
pathways.1997	Membership in a pathway, curated for PoPS
pathways.1998	Membership in a pathway, curated for PoPS
[truncated: 15,435 more rows]

## Sheet: ppi_features
Column name	Description
PPI_degree_decile	Connectedness in protein-protein interaction networks (decile)
PPI_degree_quantile	Connectedness in protein-protein interaction networks (quantile)
PPI_degree_cat	Connectedness in protein-protein interaction networks (quantile)

## Sheet: coexpression_features
Column name	Description
connect_decile	Connectedness in coexpression networks (decile)
connect_quantile	Connectedness in coexpression networks (quantile)
connectedness	Connectedness in coexpression networks
coexp_ENSG00000141371	Coexpression with indicated gene
coexp_ENSG00000163467	Coexpression with indicated gene
coexp_ENSG00000006047	Coexpression with indicated gene
coexp_ENSG00000178836	Coexpression with indicated gene
coexp_ENSG00000243150	Coexpression with indicated gene
coexp_ENSG00000230361	Coexpression with indicated gene
coexp_ENSG00000137707	Coexpression with indicated gene
coexp_ENSG00000010318	Coexpression with indicated gene
coexp_ENSG00000228075	Coexpression with indicated gene
coexp_ENSG00000143194	Coexpression with indicated gene
coexp_ENSG00000203711	Coexpression with indicated gene
coexp_ENSG00000269058	Coexpression with indicated gene
coexp_ENSG00000170777	Coexpression with indicated gene
coexp_ENSG00000111644	Coexpression with indicated gene
coexp_ENSG00000124678	Coexpression with indicated gene
coexp_ENSG00000039600	Coexpression with indicated gene
coexp_ENSG00000219435	Coexpression with indicated gene
coexp_ENSG00000112273	Coexpression with indicated gene
coexp_ENSG00000273111	Coexpression with indicated gene
coexp_ENSG00000065371	Coexpression with indicated gene
coexp_ENSG00000266826	Coexpression with indicated gene
coexp_ENSG00000248973	Coexpression with indicated gene
coexp_ENSG00000173838	Coexpression with indicated gene
coexp_ENSG00000118434	Coexpression with indicated gene
coexp_ENSG00000186118	Coexpression with indicated gene
coexp_ENSG00000165496	Coexpression with indicated gene
coexp_ENSG00000182791	Coexpression with indicated gene
coexp_ENSG00000280273	Coexpression with indicated gene
coexp_ENSG00000166329	Coexpression with indicated gene
coexp_ENSG00000230303	Coexpression with indicated gene
coexp_ENSG00000232021	Coexpression with indicated gene
coexp_ENSG00000135248	Coexpression with indicated gene
coexp_ENSG00000186150	Coexpression with indicated gene
coexp_ENSG00000183324	Coexpression with indicated gene
coexp_ENSG00000253798	Coexpression with indicated gene
coexp_ENSG00000215131	Coexpression with indicated gene
coexp_ENSG00000170627	Coexpression with indicated gene
coexp_ENSG00000120210	Coexpression with indicated gene
coexp_ENSG00000164113	Coexpression with indicated gene
coexp_ENSG00000143994	Coexpression with indicated gene
coexp_ENSG00000148156	Coexpression with indicated gene
coexp_ENSG00000187166	Coexpression with indicated gene
coexp_ENSG00000151033	Coexpression with indicated gene
coexp_ENSG00000124449	Coexpression with indicated gene
coexp_ENSG00000259361	Coexpression with indicated gene
coexp_ENSG00000163206	Coexpression with indicated gene
coexp_ENSG00000188800	Coexpression with indicated gene
coexp_ENSG00000231256	Coexpression with indicated gene
coexp_ENSG00000170748	Coexpression with indicated gene
coexp_ENSG00000145975	Coexpression with indicated gene
coexp_ENSG00000165805	Coexpression with indicated gene
coexp_ENSG00000042813	Coexpression with indicated gene
coexp_ENSG00000231163	Coexpression with indicated gene
coexp_ENSG00000121446	Coexpression with indicated gene
coexp_ENSG00000167098	Coexpression with indicated gene
coexp_ENSG00000275722	Coexpression with indicated gene
coexp_ENSG00000131059	Coexpression with indicated gene
coexp_ENSG00000198054	Coexpression with indicated gene
coexp_ENSG00000176256	Coexpression with indicated gene
coexp_ENSG00000157060	Coexpression with indicated gene
coexp_ENSG00000183654	Coexpression with indicated gene
coexp_ENSG00000184507	Coexpression with indicated gene
coexp_ENSG00000135436	Coexpression with indicated gene
coexp_ENSG00000134940	Coexpression with indicated gene
coexp_ENSG00000155087	Coexpression with indicated gene
coexp_ENSG00000260281	Coexpression with indicated gene
coexp_ENSG00000240204	Coexpression with indicated gene
coexp_ENSG00000106336	Coexpression with indicated gene
coexp_ENSG00000187581	Coexpression with indicated gene
coexp_ENSG00000114547	Coexpression with indicated gene
coexp_ENSG00000204688	Coexpression with indicated gene
coexp_ENSG00000176732	Coexpression with indicated gene
coexp_ENSG00000161594	Coexpression with indicated gene
coexp_ENSG00000187003	Coexpression with indicated gene
coexp_ENSG00000227802	Coexpression with indicated gene
coexp_ENSG00000141316	Coexpression with indicated gene
coexp_ENSG00000170950	Coexpression with indicated gene
coexp_ENSG00000170967	Coexpression with indicated gene
coexp_ENSG00000239921	Coexpression with indicated gene
coexp_ENSG00000213265	Coexpression with indicated gene
coexp_ENSG00000120563	Coexpression with indicated gene
coexp_ENSG00000100565	Coexpression with indicated gene
coexp_ENSG00000254840	Coexpression with indicated gene
coexp_ENSG00000226759	Coexpression with indicated gene
coexp_ENSG00000145491	Coexpression with indicated gene
coexp_ENSG00000157093	Coexpression with indicated gene
coexp_ENSG00000261303	Coexpression with indicated gene
coexp_ENSG00000166220	Coexpression with indicated gene
coexp_ENSG00000125531	Coexpression with indicated gene
coexp_ENSG00000140623	Coexpression with indicated gene
coexp_ENSG00000240211	Coexpression with indicated gene
coexp_ENSG00000196475	Coexpression with indicated gene
coexp_ENSG00000227195	Coexpression with indicated gene
coexp_ENSG00000248809	Coexpression with indicated gene
coexp_ENSG00000204334	Coexpression with indicated gene
coexp_ENSG00000262904	Coexpression with indicated gene
coexp_ENSG00000260551	Coexpression with indicated gene
coexp_ENSG00000169717	Coexpression with indicated gene
coexp_ENSG00000104804	Coexpression with indicated gene
coexp_ENSG00000166118	Coexpression with indicated gene
coexp_ENSG00000230534	Coexpression with indicated gene
coexp_ENSG00000254119	Coexpression with indicated gene
coexp_ENSG00000137948	Coexpression with indicated gene
coexp_ENSG00000115257	Coexpression with indicated gene
coexp_ENSG00000165325	Coexpression with indicated gene
coexp_ENSG00000149646	Coexpression with indicated gene
coexp_ENSG00000234186	Coexpression with indicated gene
coexp_ENSG00000174038	Coexpression with indicated gene
coexp_ENSG00000124196	Coexpression with indicated gene
coexp_ENSG00000111305	Coexpression with indicated gene
coexp_ENSG00000253408	Coexpression with indicated gene
coexp_ENSG00000270977	Coexpression with indicated gene
coexp_ENSG00000161652	Coexpression with indicated gene
coexp_ENSG00000175520	Coexpression with indicated gene
coexp_ENSG00000229258	Coexpression with indicated gene
coexp_ENSG00000154040	Coexpression with indicated gene
coexp_ENSG00000236866	Coexpression with indicated gene
coexp_ENSG00000253181	Coexpression with indicated gene
coexp_ENSG00000232862	Coexpression with indicated gene
coexp_ENSG00000164334	Coexpression with indicated gene
coexp_ENSG00000177910	Coexpression with indicated gene
coexp_ENSG00000251249	Coexpression with indicated gene
coexp_ENSG00000223518	Coexpression with indicated gene
coexp_ENSG00000166796	Coexpression with indicated gene
coexp_ENSG00000163440	Coexpression with indicated gene
coexp_ENSG00000235631	Coexpression with indicated gene
coexp_ENSG00000153498	Coexpression with indicated gene
coexp_ENSG00000261404	Coexpression with indicated gene
coexp_ENSG00000120160	Coexpression with indicated gene
coexp_ENSG00000275489	Coexpression with indicated gene
coexp_ENSG00000186143	Coexpression with indicated gene
coexp_ENSG00000213714	Coexpression with indicated gene
coexp_ENSG00000130377	Coexpression with indicated gene
coexp_ENSG00000233862	Coexpression with indicated gene
coexp_ENSG00000236678	Coexpression with indicated gene
coexp_ENSG00000126467	Coexpression with indicated gene
coexp_ENSG00000150628	Coexpression with indicated gene
coexp_ENSG00000243828	Coexpression with indicated gene
coexp_ENSG00000167194	Coexpression with indicated gene
coexp_ENSG00000243197	Coexpression with indicated gene
coexp_ENSG00000204930	Coexpression with indicated gene
coexp_ENSG00000237136	Coexpression with indicated gene
coexp_ENSG00000203942	Coexpression with indicated gene
coexp_ENSG00000148602	Coexpression with indicated gene
coexp_ENSG00000105428	Coexpression with indicated gene
coexp_ENSG00000224637	Coexpression with indicated gene
coexp_ENSG00000234199	Coexpression with indicated gene
coexp_ENSG00000231989	Coexpression with indicated gene
coexp_ENSG00000124490	Coexpression with indicated gene
coexp_ENSG00000235519	Coexpression with indicated gene
coexp_ENSG00000168454	Coexpression with indicated gene
coexp_ENSG00000267489	Coexpression with indicated gene
coexp_ENSG00000217442	Coexpression with indicated gene
coexp_ENSG00000257513	Coexpression with indicated gene
coexp_ENSG00000248228	Coexpression with indicated gene
coexp_ENSG00000124103	Coexpression with indicated gene
coexp_ENSG00000173013	Coexpression with indicated gene
coexp_ENSG00000270806	Coexpression with indicated gene
coexp_ENSG00000173093	Coexpression with indicated gene
coexp_ENSG00000226268	Coexpression with indicated gene
coexp_ENSG00000121634	Coexpression with indicated gene
coexp_ENSG00000261080	Coexpression with indicated gene
coexp_ENSG00000242220	Coexpression with indicated gene
coexp_ENSG00000237605	Coexpression with indicated gene
coexp_ENSG00000198326	Coexpression with indicated gene
coexp_ENSG00000189332	Coexpression with indicated gene
coexp_ENSG00000165120	Coexpression with indicated gene
coexp_ENSG00000230246	Coexpression with indicated gene
coexp_ENSG00000165059	Coexpression with indicated gene
coexp_ENSG00000166323	Coexpression with indicated gene
coexp_ENSG00000179407	Coexpression with indicated gene
coexp_ENSG00000237750	Coexpression with indicated gene
coexp_ENSG00000158525	Coexpression with indicated gene
coexp_ENSG00000167525	Coexpression with indicated gene
coexp_ENSG00000179580	Coexpression with indicated gene
coexp_ENSG00000164744	Coexpression with indicated gene
coexp_ENSG00000197651	Coexpression with indicated gene
coexp_ENSG00000225850	Coexpression with indicated gene
coexp_ENSG00000175877	Coexpression with indicated gene
coexp_ENSG00000151846	Coexpression with indicated gene
coexp_ENSG00000177143	Coexpression with indicated gene
coexp_ENSG00000166069	Coexpression with indicated gene
coexp_ENSG00000253557	Coexpression with indicated gene
coexp_ENSG00000153363	Coexpression with indicated gene
coexp_ENSG00000157653	Coexpression with indicated gene
coexp_ENSG00000161973	Coexpression with indicated gene
coexp_ENSG00000162592	Coexpression with indicated gene
coexp_ENSG00000177202	Coexpression with indicated gene
coexp_ENSG00000111254	Coexpression with indicated gene
coexp_ENSG00000235740	Coexpression with indicated gene
coexp_ENSG00000255161	Coexpression with indicated gene
coexp_ENSG00000253679	Coexpression with indicated gene
coexp_ENSG00000274209	Coexpression with indicated gene
coexp_ENSG00000185264	Coexpression with indicated gene
coexp_ENSG00000163749	Coexpression with indicated gene
coexp_ENSG00000265480	Coexpression with indicated gene
coexp_ENSG00000167139	Coexpression with indicated gene
coexp_ENSG00000248307	Coexpression with indicated gene
coexp_ENSG00000139656	Coexpression with indicated gene
coexp_ENSG00000179636	Coexpression with indicated gene
coexp_ENSG00000231976	Coexpression with indicated gene
coexp_ENSG00000168594	Coexpression with indicated gene
coexp_ENSG00000225437	Coexpression with indicated gene
coexp_ENSG00000229766	Coexpression with indicated gene
coexp_ENSG00000283036	Coexpression with indicated gene
coexp_ENSG00000237282	Coexpression with indicated gene
coexp_ENSG00000238283	Coexpression with indicated gene
coexp_ENSG00000125514	Coexpression with indicated gene
coexp_ENSG00000248391	Coexpression with indicated gene
coexp_ENSG00000258526	Coexpression with indicated gene
coexp_ENSG00000233570	Coexpression with indicated gene
coexp_ENSG00000214761	Coexpression with indicated gene
coexp_ENSG00000251676	Coexpression with indicated gene
coexp_ENSG00000168589	Coexpression with indicated gene
coexp_ENSG00000196553	Coexpression with indicated gene
coexp_ENSG00000229972	Coexpression with indicated gene
coexp_ENSG00000185013	Coexpression with indicated gene
coexp_ENSG00000131864	Coexpression with indicated gene
coexp_ENSG00000181867	Coexpression with indicated gene
coexp_ENSG00000269332	Coexpression with indicated gene
coexp_ENSG00000225564	Coexpression with indicated gene
coexp_ENSG00000128040	Coexpression with indicated gene
coexp_ENSG00000230651	Coexpression with indicated gene
coexp_ENSG00000163645	Coexpression with indicated gene
coexp_ENSG00000283439	Coexpression with indicated gene
coexp_ENSG00000181995	Coexpression with indicated gene
coexp_ENSG00000239877	Coexpression with indicated gene
coexp_ENSG00000255042	Coexpression with indicated gene
coexp_ENSG00000175202	Coexpression with indicated gene
coexp_ENSG00000198033	Coexpression with indicated gene
coexp_ENSG00000230501	Coexpression with indicated gene
coexp_ENSG00000125975	Coexpression with indicated gene
coexp_ENSG00000171495	Coexpression with indicated gene
coexp_ENSG00000234215	Coexpression with indicated gene
coexp_ENSG00000152670	Coexpression with indicated gene
coexp_ENSG00000278916	Coexpression with indicated gene
coexp_ENSG00000180043	Coexpression with indicated gene
coexp_ENSG00000173389	Coexpression with indicated gene
coexp_ENSG00000185863	Coexpression with indicated gene
coexp_ENSG00000261239	Coexpression with indicated gene
coexp_ENSG00000238007	Coexpression with indicated gene
coexp_ENSG00000214725	Coexpression with indicated gene
coexp_ENSG00000178395	Coexpression with indicated gene
coexp_ENSG00000137473	Coexpression with indicated gene
coexp_ENSG00000204849	Coexpression with indicated gene
coexp_ENSG00000163114	Coexpression with indicated gene
coexp_ENSG00000163705	Coexpression with indicated gene
coexp_ENSG00000249231	Coexpression with indicated gene
coexp_ENSG00000177414	Coexpression with indicated gene
coexp_ENSG00000273313	Coexpression with indicated gene
coexp_ENSG00000166246	Coexpression with indicated gene
coexp_ENSG00000187600	Coexpression with indicated gene
coexp_ENSG00000276210	Coexpression with indicated gene
coexp_ENSG00000279284	Coexpression with indicated gene
coexp_ENSG00000143199	Coexpression with indicated gene
coexp_ENSG00000261202	Coexpression with indicated gene
coexp_ENSG00000249481	Coexpression with indicated gene
coexp_ENSG00000106328	Coexpression with indicated gene
coexp_ENSG00000229937	Coexpression with indicated gene
coexp_ENSG00000123171	Coexpression with indicated gene
coexp_ENSG00000255649	Coexpression with indicated gene
coexp_ENSG00000260477	Coexpression with indicated gene
coexp_ENSG00000224048	Coexpression with indicated gene
coexp_ENSG00000237401	Coexpression with indicated gene
coexp_ENSG00000222004	Coexpression with indicated gene
coexp_ENSG00000104901	Coexpression with indicated gene
coexp_ENSG00000258583	Coexpression with indicated gene
coexp_ENSG00000179168	Coexpression with indicated gene
coexp_ENSG00000256803	Coexpression with indicated gene
coexp_ENSG00000141200	Coexpression with indicated gene
coexp_ENSG00000259831	Coexpression with indicated gene
coexp_ENSG00000174898	Coexpression with indicated gene
coexp_ENSG00000258713	Coexpression with indicated gene
coexp_ENSG00000124818	Coexpression with indicated gene
coexp_ENSG00000188386	Coexpression with indicated gene
coexp_ENSG00000189375	Coexpression with indicated gene
coexp_ENSG00000225929	Coexpression with indicated gene
coexp_ENSG00000203897	Coexpression with indicated gene
coexp_ENSG00000214929	Coexpression with indicated gene
coexp_ENSG00000261595	Coexpression with indicated gene
coexp_ENSG00000205108	Coexpression with indicated gene
coexp_ENSG00000130167	Coexpression with indicated gene
coexp_ENSG00000242049	Coexpression with indicated gene
coexp_ENSG00000205359	Coexpression with indicated gene
coexp_ENSG00000188755	Coexpression with indicated gene
coexp_ENSG00000226258	Coexpression with indicated gene
coexp_ENSG00000218823	Coexpression with indicated gene
coexp_ENSG00000228829	Coexpression with indicated gene
coexp_ENSG00000189269	Coexpression with indicated gene
coexp_ENSG00000103023	Coexpression with indicated gene
coexp_ENSG00000205832	Coexpression with indicated gene
coexp_ENSG00000169194	Coexpression with indicated gene
coexp_ENSG00000179088	Coexpression with indicated gene
coexp_ENSG00000248529	Coexpression with indicated gene
coexp_ENSG00000269931	Coexpression with indicated gene
coexp_ENSG00000251629	Coexpression with indicated gene
coexp_ENSG00000247595	Coexpression with indicated gene
coexp_ENSG00000228141	Coexpression with indicated gene
coexp_ENSG00000188782	Coexpression with indicated gene
coexp_ENSG00000186007	Coexpression with indicated gene
coexp_ENSG00000185290	Coexpression with indicated gene
coexp_ENSG00000229315	Coexpression with indicated gene
coexp_ENSG00000248837	Coexpression with indicated gene
coexp_ENSG00000272154	Coexpression with indicated gene
coexp_ENSG00000186788	Coexpression with indicated gene
coexp_ENSG00000232860	Coexpression with indicated gene
coexp_ENSG00000224973	Coexpression with indicated gene
coexp_ENSG00000226995	Coexpression with indicated gene
coexp_ENSG00000259786	Coexpression with indicated gene
coexp_ENSG00000204684	Coexpression with indicated gene
coexp_ENSG00000160207	Coexpression with indicated gene
coexp_ENSG00000240021	Coexpression with indicated gene
coexp_ENSG00000236299	Coexpression with indicated gene
coexp_ENSG00000233891	Coexpression with indicated gene
coexp_ENSG00000155875	Coexpression with indicated gene
coexp_ENSG00000100312	Coexpression with indicated gene
coexp_ENSG00000125900	Coexpression with indicated gene
coexp_ENSG00000162779	Coexpression with indicated gene
coexp_ENSG00000143450	Coexpression with indicated gene
coexp_ENSG00000187806	Coexpression with indicated gene
coexp_ENSG00000185972	Coexpression with indicated gene
coexp_ENSG00000188163	Coexpression with indicated gene
coexp_ENSG00000230768	Coexpression with indicated gene
coexp_ENSG00000142530	Coexpression with indicated gene
coexp_ENSG00000143552	Coexpression with indicated gene
coexp_ENSG00000138892	Coexpression with indicated gene
coexp_ENSG00000232554	Coexpression with indicated gene
coexp_ENSG00000181786	Coexpression with indicated gene
coexp_ENSG00000229582	Coexpression with indicated gene
coexp_ENSG00000184560	Coexpression with indicated gene
coexp_ENSG00000212122	Coexpression with indicated gene
coexp_ENSG00000139797	Coexpression with indicated gene
coexp_ENSG00000263438	Coexpression with indicated gene
coexp_ENSG00000204296	Coexpression with indicated gene
coexp_ENSG00000239705	Coexpression with indicated gene
coexp_ENSG00000177938	Coexpression with indicated gene
coexp_ENSG00000261446	Coexpression with indicated gene
coexp_ENSG00000236497	Coexpression with indicated gene
coexp_ENSG00000152430	Coexpression with indicated gene
coexp_ENSG00000237054	Coexpression with indicated gene
coexp_ENSG00000253100	Coexpression with indicated gene
coexp_ENSG00000105679	Coexpression with indicated gene
coexp_ENSG00000186075	Coexpression with indicated gene
coexp_ENSG00000234270	Coexpression with indicated gene
coexp_ENSG00000281460	Coexpression with indicated gene
coexp_ENSG00000163424	Coexpression with indicated gene
coexp_ENSG00000250719	Coexpression with indicated gene
coexp_ENSG00000260456	Coexpression with indicated gene
coexp_ENSG00000249131	Coexpression with indicated gene
coexp_ENSG00000253643	Coexpression with indicated gene
coexp_ENSG00000254451	Coexpression with indicated gene
coexp_ENSG00000136449	Coexpression with indicated gene
coexp_ENSG00000225362	Coexpression with indicated gene
coexp_ENSG00000187686	Coexpression with indicated gene
coexp_ENSG00000155754	Coexpression with indicated gene
coexp_ENSG00000254718	Coexpression with indicated gene
coexp_ENSG00000227528	Coexpression with indicated gene
coexp_ENSG00000243926	Coexpression with indicated gene
coexp_ENSG00000165131	Coexpression with indicated gene
coexp_ENSG00000181323	Coexpression with indicated gene
coexp_ENSG00000204006	Coexpression with indicated gene
coexp_ENSG00000138483	Coexpression with indicated gene
coexp_ENSG00000106013	Coexpression with indicated gene
coexp_ENSG00000241449	Coexpression with indicated gene
coexp_ENSG00000259572	Coexpression with indicated gene
coexp_ENSG00000161180	Coexpression with indicated gene
coexp_ENSG00000234265	Coexpression with indicated gene
coexp_ENSG00000235914	Coexpression with indicated gene
coexp_ENSG00000232913	Coexpression with indicated gene
coexp_ENSG00000282887	Coexpression with indicated gene
coexp_ENSG00000257137	Coexpression with indicated gene
coexp_ENSG00000230366	Coexpression with indicated gene
coexp_ENSG00000224910	Coexpression with indicated gene
coexp_ENSG00000259591	Coexpression with indicated gene
coexp_ENSG00000170236	Coexpression with indicated gene
coexp_ENSG00000125409	Coexpression with indicated gene
coexp_ENSG00000150676	Coexpression with indicated gene
coexp_ENSG00000259783	Coexpression with indicated gene
coexp_ENSG00000251613	Coexpression with indicated gene
coexp_ENSG00000166578	Coexpression with indicated gene
coexp_ENSG00000178997	Coexpression with indicated gene
coexp_ENSG00000261192	Coexpression with indicated gene
coexp_ENSG00000215296	Coexpression with indicated gene
coexp_ENSG00000179071	Coexpression with indicated gene
coexp_ENSG00000261407	Coexpression with indicated gene
coexp_ENSG00000134249	Coexpression with indicated gene
coexp_ENSG00000237468	Coexpression with indicated gene
coexp_ENSG00000231046	Coexpression with indicated gene
coexp_ENSG00000255262	Coexpression with indicated gene
coexp_ENSG00000230600	Coexpression with indicated gene
coexp_ENSG00000105549	Coexpression with indicated gene
coexp_ENSG00000139151	Coexpression with indicated gene
coexp_ENSG00000264765	Coexpression with indicated gene
coexp_ENSG00000197768	Coexpression with indicated gene
coexp_ENSG00000171060	Coexpression with indicated gene
coexp_ENSG00000173699	Coexpression with indicated gene
coexp_ENSG00000176160	Coexpression with indicated gene
coexp_ENSG00000237524	Coexpression with indicated gene
coexp_ENSG00000274052	Coexpression with indicated gene
coexp_ENSG00000171804	Coexpression with indicated gene
coexp_ENSG00000227868	Coexpression with indicated gene
coexp_ENSG00000241560	Coexpression with indicated gene
coexp_ENSG00000257198	Coexpression with indicated gene
coexp_ENSG00000233261	Coexpression with indicated gene
coexp_ENSG00000271989	Coexpression with indicated gene
coexp_ENSG00000270816	Coexpression with indicated gene
coexp_ENSG00000240311	Coexpression with indicated gene
coexp_ENSG00000144962	Coexpression with indicated gene
coexp_ENSG00000230848	Coexpression with indicated gene
coexp_ENSG00000223635	Coexpression with indicated gene
coexp_ENSG00000270244	Coexpression with indicated gene
coexp_ENSG00000164304	Coexpression with indicated gene
coexp_ENSG00000261697	Coexpression with indicated gene
coexp_ENSG00000224977	Coexpression with indicated gene
coexp_ENSG00000227431	Coexpression with indicated gene
coexp_ENSG00000254497	Coexpression with indicated gene
coexp_ENSG00000170469	Coexpression with indicated gene
coexp_ENSG00000184735	Coexpression with indicated gene
coexp_ENSG00000263201	Coexpression with indicated gene
coexp_ENSG00000267579	Coexpression with indicated gene
coexp_ENSG00000186451	Coexpression with indicated gene
coexp_ENSG00000255572	Coexpression with indicated gene
coexp_ENSG00000248468	Coexpression with indicated gene
coexp_ENSG00000242440	Coexpression with indicated gene
coexp_ENSG00000230054	Coexpression with indicated gene
coexp_ENSG00000261013	Coexpression with indicated gene
coexp_ENSG00000171722	Coexpression with indicated gene
coexp_ENSG00000205853	Coexpression with indicated gene
coexp_ENSG00000253506	Coexpression with indicated gene
coexp_ENSG00000174015	Coexpression with indicated gene
coexp_ENSG00000261403	Coexpression with indicated gene
coexp_ENSG00000235488	Coexpression with indicated gene
coexp_ENSG00000187753	Coexpression with indicated gene
coexp_ENSG00000282904	Coexpression with indicated gene
coexp_ENSG00000177673	Coexpression with indicated gene
coexp_ENSG00000227029	Coexpression with indicated gene
coexp_ENSG00000235931	Coexpression with indicated gene
coexp_ENSG00000237654	Coexpression with indicated gene
coexp_ENSG00000250803	Coexpression with indicated gene
coexp_ENSG00000241469	Coexpression with indicated gene
coexp_ENSG00000125888	Coexpression with indicated gene
coexp_ENSG00000228679	Coexpression with indicated gene
coexp_ENSG00000242507	Coexpression with indicated gene
coexp_ENSG00000168619	Coexpression with indicated gene
coexp_ENSG00000236445	Coexpression with indicated gene
coexp_ENSG00000228504	Coexpression with indicated gene
coexp_ENSG00000228538	Coexpression with indicated gene
coexp_ENSG00000168676	Coexpression with indicated gene
coexp_ENSG00000154007	Coexpression with indicated gene
coexp_ENSG00000229894	Coexpression with indicated gene
coexp_ENSG00000237463	Coexpression with indicated gene
coexp_ENSG00000225640	Coexpression with indicated gene
coexp_ENSG00000258038	Coexpression with indicated gene
coexp_ENSG00000265788	Coexpression with indicated gene
coexp_ENSG00000214188	Coexpression with indicated gene
coexp_ENSG00000255332	Coexpression with indicated gene
coexp_ENSG00000092200	Coexpression with indicated gene
coexp_ENSG00000132681	Coexpression with indicated gene
coexp_ENSG00000169154	Coexpression with indicated gene
coexp_ENSG00000232553	Coexpression with indicated gene
coexp_ENSG00000229613	Coexpression with indicated gene
coexp_ENSG00000251497	Coexpression with indicated gene
coexp_ENSG00000204193	Coexpression with indicated gene
coexp_ENSG00000225605	Coexpression with indicated gene
coexp_ENSG00000255420	Coexpression with indicated gene
coexp_ENSG00000146221	Coexpression with indicated gene
coexp_ENSG00000249882	Coexpression with indicated gene
coexp_ENSG00000256560	Coexpression with indicated gene
coexp_ENSG00000241369	Coexpression with indicated gene
coexp_ENSG00000257906	Coexpression with indicated gene
coexp_ENSG00000175809	Coexpression with indicated gene
coexp_ENSG00000153060	Coexpression with indicated gene
coexp_ENSG00000236172	Coexpression with indicated gene
coexp_ENSG00000260422	Coexpression with indicated gene
coexp_ENSG00000197140	Coexpression with indicated gene
coexp_ENSG00000267097	Coexpression with indicated gene
coexp_ENSG00000185177	Coexpression with indicated gene
coexp_ENSG00000104941	Coexpression with indicated gene
coexp_ENSG00000005189	Coexpression with indicated gene
coexp_ENSG00000248222	Coexpression with indicated gene
coexp_ENSG00000236980	Coexpression with indicated gene
coexp_ENSG00000236024	Coexpression with indicated gene
coexp_ENSG00000186976	Coexpression with indicated gene
coexp_ENSG00000152705	Coexpression with indicated gene
coexp_ENSG00000160471	Coexpression with indicated gene
coexp_ENSG00000177112	Coexpression with indicated gene
coexp_ENSG00000256750	Coexpression with indicated gene
coexp_ENSG00000244219	Coexpression with indicated gene
coexp_ENSG00000249854	Coexpression with indicated gene
coexp_ENSG00000226668	Coexpression with indicated gene
coexp_ENSG00000183318	Coexpression with indicated gene
coexp_ENSG00000206181	Coexpression with indicated gene
coexp_ENSG00000238275	Coexpression with indicated gene
coexp_ENSG00000170948	Coexpression with indicated gene
coexp_ENSG00000188050	Coexpression with indicated gene
coexp_ENSG00000278685	Coexpression with indicated gene
coexp_ENSG00000114656	Coexpression with indicated gene
coexp_ENSG00000235661	Coexpression with indicated gene
coexp_ENSG00000230583	Coexpression with indicated gene
coexp_ENSG00000254863	Coexpression with indicated gene
coexp_ENSG00000267252	Coexpression with indicated gene
coexp_ENSG00000259700	Coexpression with indicated gene
coexp_ENSG00000234263	Coexpression with indicated gene
coexp_ENSG00000225879	Coexpression with indicated gene
coexp_ENSG00000176571	Coexpression with indicated gene
coexp_ENSG00000251574	Coexpression with indicated gene
coexp_ENSG00000215910	Coexpression with indicated gene
coexp_ENSG00000237521	Coexpression with indicated gene
coexp_ENSG00000204663	Coexpression with indicated gene
coexp_ENSG00000256551	Coexpression with indicated gene
coexp_ENSG00000253541	Coexpression with indicated gene
coexp_ENSG00000004838	Coexpression with indicated gene
coexp_ENSG00000244564	Coexpression with indicated gene
coexp_ENSG00000203784	Coexpression with indicated gene
coexp_ENSG00000223446	Coexpression with indicated gene
coexp_ENSG00000230219	Coexpression with indicated gene
coexp_ENSG00000268629	Coexpression with indicated gene
coexp_ENSG00000271889	Coexpression with indicated gene
coexp_ENSG00000164037	Coexpression with indicated gene
coexp_ENSG00000168367	Coexpression with indicated gene
coexp_ENSG00000269761	Coexpression with indicated gene
coexp_ENSG00000214819	Coexpression with indicated gene
coexp_ENSG00000254584	Coexpression with indicated gene
coexp_ENSG00000165383	Coexpression with indicated gene
coexp_ENSG00000228740	Coexpression with indicated gene
coexp_ENSG00000267559	Coexpression with indicated gene
coexp_ENSG00000147081	Coexpression with indicated gene
coexp_ENSG00000236295	Coexpression with indicated gene
coexp_ENSG00000213471	Coexpression with indicated gene
coexp_ENSG00000099840	Coexpression with indicated gene
coexp_ENSG00000226807	Coexpression with indicated gene
coexp_ENSG00000142698	Coexpression with indicated gene
coexp_ENSG00000226921	Coexpression with indicated gene
coexp_ENSG00000147570	Coexpression with indicated gene
coexp_ENSG00000251273	Coexpression with indicated gene
coexp_ENSG00000234776	Coexpression with indicated gene
coexp_ENSG00000228140	Coexpression with indicated gene
coexp_ENSG00000241336	Coexpression with indicated gene
coexp_ENSG00000258390	Coexpression with indicated gene
coexp_ENSG00000256862	Coexpression with indicated gene
coexp_ENSG00000106648	Coexpression with indicated gene
coexp_ENSG00000099338	Coexpression with indicated gene
coexp_ENSG00000275846	Coexpression with indicated gene
coexp_ENSG00000251154	Coexpression with indicated gene
coexp_ENSG00000254823	Coexpression with indicated gene
coexp_ENSG00000226650	Coexpression with indicated gene
coexp_ENSG00000189139	Coexpression with indicated gene
coexp_ENSG00000128408	Coexpression with indicated gene
coexp_ENSG00000203795	Coexpression with indicated gene
coexp_ENSG00000159708	Coexpression with indicated gene
coexp_ENSG00000162814	Coexpression with indicated gene
coexp_ENSG00000132631	Coexpression with indicated gene
coexp_ENSG00000260433	Coexpression with indicated gene
coexp_ENSG00000261275	Coexpression with indicated gene
coexp_ENSG00000170516	Coexpression with indicated gene
coexp_ENSG00000231476	Coexpression with indicated gene
coexp_ENSG00000089505	Coexpression with indicated gene
coexp_ENSG00000223442	Coexpression with indicated gene
coexp_ENSG00000186280	Coexpression with indicated gene
coexp_ENSG00000257860	Coexpression with indicated gene
coexp_ENSG00000228422	Coexpression with indicated gene
coexp_ENSG00000232113	Coexpression with indicated gene
coexp_ENSG00000132141	Coexpression with indicated gene
coexp_ENSG00000246095	Coexpression with indicated gene
coexp_ENSG00000168491	Coexpression with indicated gene
coexp_ENSG00000267337	Coexpression with indicated gene
coexp_ENSG00000229154	Coexpression with indicated gene
coexp_ENSG00000132554	Coexpression with indicated gene
coexp_ENSG00000279827	Coexpression with indicated gene
coexp_ENSG00000149443	Coexpression with indicated gene
coexp_ENSG00000250590	Coexpression with indicated gene
coexp_ENSG00000248767	Coexpression with indicated gene
coexp_ENSG00000256944	Coexpression with indicated gene
coexp_ENSG00000266988	Coexpression with indicated gene
coexp_ENSG00000222035	Coexpression with indicated gene
coexp_ENSG00000255272	Coexpression with indicated gene
coexp_ENSG00000184108	Coexpression with indicated gene
coexp_ENSG00000231898	Coexpression with indicated gene
coexp_ENSG00000233288	Coexpression with indicated gene
coexp_ENSG00000173728	Coexpression with indicated gene
coexp_ENSG00000154479	Coexpression with indicated gene
coexp_ENSG00000261831	Coexpression with indicated gene
coexp_ENSG00000234884	Coexpression with indicated gene
coexp_ENSG00000248311	Coexpression with indicated gene
coexp_ENSG00000178645	Coexpression with indicated gene
coexp_ENSG00000234255	Coexpression with indicated gene
coexp_ENSG00000216436	Coexpression with indicated gene
coexp_ENSG00000258826	Coexpression with indicated gene
coexp_ENSG00000233153	Coexpression with indicated gene
coexp_ENSG00000234860	Coexpression with indicated gene
coexp_ENSG00000253326	Coexpression with indicated gene
coexp_ENSG00000255568	Coexpression with indicated gene
coexp_ENSG00000225488	Coexpression with indicated gene
coexp_ENSG00000238062	Coexpression with indicated gene
coexp_ENSG00000235537	Coexpression with indicated gene
coexp_ENSG00000225881	Coexpression with indicated gene
coexp_ENSG00000258742	Coexpression with indicated gene
coexp_ENSG00000215262	Coexpression with indicated gene
coexp_ENSG00000226763	Coexpression with indicated gene
coexp_ENSG00000279523	Coexpression with indicated gene
coexp_ENSG00000283679	Coexpression with indicated gene
coexp_ENSG00000268318	Coexpression with indicated gene
coexp_ENSG00000279655	Coexpression with indicated gene
coexp_ENSG00000260125	Coexpression with indicated gene
coexp_ENSG00000172421	Coexpression with indicated gene
coexp_ENSG00000155833	Coexpression with indicated gene
coexp_ENSG00000261475	Coexpression with indicated gene
coexp_ENSG00000267882	Coexpression with indicated gene
coexp_ENSG00000250754	Coexpression with indicated gene
coexp_ENSG00000172361	Coexpression with indicated gene
coexp_ENSG00000236444	Coexpression with indicated gene
coexp_ENSG00000228100	Coexpression with indicated gene
coexp_ENSG00000266985	Coexpression with indicated gene
coexp_ENSG00000253787	Coexpression with indicated gene
coexp_ENSG00000141255	Coexpression with indicated gene
coexp_ENSG00000184378	Coexpression with indicated gene
coexp_ENSG00000228329	Coexpression with indicated gene
coexp_ENSG00000213232	Coexpression with indicated gene
coexp_ENSG00000261649	Coexpression with indicated gene
coexp_ENSG00000282975	Coexpression with indicated gene
coexp_ENSG00000184345	Coexpression with indicated gene
coexp_ENSG00000267779	Coexpression with indicated gene
coexp_ENSG00000170788	Coexpression with indicated gene
coexp_ENSG00000160994	Coexpression with indicated gene
coexp_ENSG00000228309	Coexpression with indicated gene
coexp_ENSG00000267308	Coexpression with indicated gene
coexp_ENSG00000236253	Coexpression with indicated gene
coexp_ENSG00000230090	Coexpression with indicated gene
coexp_ENSG00000267857	Coexpression with indicated gene
coexp_ENSG00000144671	Coexpression with indicated gene
coexp_ENSG00000226250	Coexpression with indicated gene
coexp_ENSG00000247624	Coexpression with indicated gene
coexp_ENSG00000261341	Coexpression with indicated gene
coexp_ENSG00000239589	Coexpression with indicated gene
coexp_ENSG00000175699	Coexpression with indicated gene
coexp_ENSG00000258957	Coexpression with indicated gene
coexp_ENSG00000227080	Coexpression with indicated gene
coexp_ENSG00000198445	Coexpression with indicated gene
coexp_ENSG00000278719	Coexpression with indicated gene
coexp_ENSG00000196860	Coexpression with indicated gene
coexp_ENSG00000186452	Coexpression with indicated gene
coexp_ENSG00000260955	Coexpression with indicated gene
coexp_ENSG00000268095	Coexpression with indicated gene
coexp_ENSG00000257762	Coexpression with indicated gene
coexp_ENSG00000250514	Coexpression with indicated gene
coexp_ENSG00000163793	Coexpression with indicated gene
coexp_ENSG00000226754	Coexpression with indicated gene
coexp_ENSG00000229522	Coexpression with indicated gene
coexp_ENSG00000225510	Coexpression with indicated gene
coexp_ENSG00000263765	Coexpression with indicated gene
coexp_ENSG00000141437	Coexpression with indicated gene
coexp_ENSG00000257711	Coexpression with indicated gene
coexp_ENSG00000257985	Coexpression with indicated gene
coexp_ENSG00000231492	Coexpression with indicated gene
coexp_ENSG00000283268	Coexpression with indicated gene
coexp_ENSG00000275374	Coexpression with indicated gene
coexp_ENSG00000184361	Coexpression with indicated gene
coexp_ENSG00000232132	Coexpression with indicated gene
coexp_ENSG00000270379	Coexpression with indicated gene
coexp_ENSG00000262869	Coexpression with indicated gene
coexp_ENSG00000233515	Coexpression with indicated gene
coexp_ENSG00000233316	Coexpression with indicated gene
coexp_ENSG00000162620	Coexpression with indicated gene
coexp_ENSG00000138813	Coexpression with indicated gene
coexp_ENSG00000279047	Coexpression with indicated gene
coexp_ENSG00000255507	Coexpression with indicated gene
coexp_ENSG00000168658	Coexpression with indicated gene
coexp_ENSG00000253190	Coexpression with indicated gene
coexp_ENSG00000225626	Coexpression with indicated gene
coexp_ENSG00000243995	Coexpression with indicated gene
coexp_ENSG00000253695	Coexpression with indicated gene
coexp_ENSG00000156269	Coexpression with indicated gene
coexp_ENSG00000219926	Coexpression with indicated gene
coexp_ENSG00000157578	Coexpression with indicated gene
coexp_ENSG00000159625	Coexpression with indicated gene
coexp_ENSG00000180764	Coexpression with indicated gene
coexp_ENSG00000196900	Coexpression with indicated gene
coexp_ENSG00000260969	Coexpression with indicated gene
coexp_ENSG00000143443	Coexpression with indicated gene
coexp_ENSG00000170613	Coexpression with indicated gene
coexp_ENSG00000226447	Coexpression with indicated gene
coexp_ENSG00000182584	Coexpression with indicated gene
coexp_ENSG00000254518	Coexpression with indicated gene
coexp_ENSG00000265041	Coexpression with indicated gene
coexp_ENSG00000223601	Coexpression with indicated gene
coexp_ENSG00000227375	Coexpression with indicated gene
coexp_ENSG00000232117	Coexpression with indicated gene
coexp_ENSG00000226581	Coexpression with indicated gene
coexp_ENSG00000259447	Coexpression with indicated gene
coexp_ENSG00000253961	Coexpression with indicated gene
coexp_ENSG00000237728	Coexpression with indicated gene
coexp_ENSG00000198723	Coexpression with indicated gene
coexp_ENSG00000271013	Coexpression with indicated gene
coexp_ENSG00000205500	Coexpression with indicated gene
coexp_ENSG00000283516	Coexpression with indicated gene
coexp_ENSG00000164729	Coexpression with indicated gene
coexp_ENSG00000254960	Coexpression with indicated gene
coexp_ENSG00000234855	Coexpression with indicated gene
coexp_ENSG00000225084	Coexpression with indicated gene
coexp_ENSG00000283044	Coexpression with indicated gene
coexp_ENSG00000263279	Coexpression with indicated gene
coexp_ENSG00000253103	Coexpression with indicated gene
coexp_ENSG00000248572	Coexpression with indicated gene
coexp_ENSG00000232998	Coexpression with indicated gene
coexp_ENSG00000155714	Coexpression with indicated gene
coexp_ENSG00000259482	Coexpression with indicated gene
coexp_ENSG00000183066	Coexpression with indicated gene
coexp_ENSG00000249781	Coexpression with indicated gene
coexp_ENSG00000231784	Coexpression with indicated gene
coexp_ENSG00000140955	Coexpression with indicated gene
coexp_ENSG00000269364	Coexpression with indicated gene
coexp_ENSG00000185594	Coexpression with indicated gene
coexp_ENSG00000229688	Coexpression with indicated gene
coexp_ENSG00000073598	Coexpression with indicated gene
coexp_ENSG00000140478	Coexpression with indicated gene
coexp_ENSG00000250582	Coexpression with indicated gene
coexp_ENSG00000249833	Coexpression with indicated gene
coexp_ENSG00000225980	Coexpression with indicated gene
coexp_ENSG00000257023	Coexpression with indicated gene
coexp_ENSG00000187812	Coexpression with indicated gene
coexp_ENSG00000224792	Coexpression with indicated gene
coexp_ENSG00000258573	Coexpression with indicated gene
coexp_ENSG00000248872	Coexpression with indicated gene
coexp_ENSG00000237732	Coexpression with indicated gene
coexp_ENSG00000229021	Coexpression with indicated gene
coexp_ENSG00000280155	Coexpression with indicated gene
coexp_ENSG00000272329	Coexpression with indicated gene
coexp_ENSG00000226695	Coexpression with indicated gene
coexp_ENSG00000253281	Coexpression with indicated gene
coexp_ENSG00000226620	Coexpression with indicated gene
coexp_ENSG00000228317	Coexpression with indicated gene
coexp_ENSG00000230601	Coexpression with indicated gene
coexp_ENSG00000266014	Coexpression with indicated gene
coexp_ENSG00000261261	Coexpression with indicated gene
coexp_ENSG00000187144	Coexpression with indicated gene
coexp_ENSG00000261436	Coexpression with indicated gene
coexp_ENSG00000204661	Coexpression with indicated gene
coexp_ENSG00000233047	Coexpression with indicated gene
coexp_ENSG00000234650	Coexpression with indicated gene
coexp_ENSG00000260026	Coexpression with indicated gene
coexp_ENSG00000161036	Coexpression with indicated gene
coexp_ENSG00000172717	Coexpression with indicated gene
coexp_ENSG00000187658	Coexpression with indicated gene
coexp_ENSG00000249873	Coexpression with indicated gene
coexp_ENSG00000182035	Coexpression with indicated gene
coexp_ENSG00000239649	Coexpression with indicated gene
coexp_ENSG00000182896	Coexpression with indicated gene
coexp_ENSG00000189238	Coexpression with indicated gene
coexp_ENSG00000234308	Coexpression with indicated gene
coexp_ENSG00000132958	Coexpression with indicated gene
coexp_ENSG00000227907	Coexpression with indicated gene
coexp_ENSG00000139445	Coexpression with indicated gene
coexp_ENSG00000229027	Coexpression with indicated gene
coexp_ENSG00000163098	Coexpression with indicated gene
coexp_ENSG00000258256	Coexpression with indicated gene
coexp_ENSG00000183559	Coexpression with indicated gene
coexp_ENSG00000174448	Coexpression with indicated gene
coexp_ENSG00000205784	Coexpression with indicated gene
coexp_ENSG00000234828	Coexpression with indicated gene
coexp_ENSG00000225785	Coexpression with indicated gene
coexp_ENSG00000230371	Coexpression with indicated gene
coexp_ENSG00000130783	Coexpression with indicated gene
coexp_ENSG00000105982	Coexpression with indicated gene
coexp_ENSG00000178404	Coexpression with indicated gene
coexp_ENSG00000162129	Coexpression with indicated gene
coexp_ENSG00000230400	Coexpression with indicated gene
coexp_ENSG00000282898	Coexpression with indicated gene
coexp_ENSG00000171790	Coexpression with indicated gene
coexp_ENSG00000251040	Coexpression with indicated gene
coexp_ENSG00000073146	Coexpression with indicated gene
coexp_ENSG00000162571	Coexpression with indicated gene
coexp_ENSG00000173557	Coexpression with indicated gene
coexp_ENSG00000143006	Coexpression with indicated gene
coexp_ENSG00000235989	Coexpression with indicated gene
coexp_ENSG00000249017	Coexpression with indicated gene
coexp_ENSG00000120329	Coexpression with indicated gene
coexp_ENSG00000229240	Coexpression with indicated gene
coexp_ENSG00000230528	Coexpression with indicated gene
coexp_ENSG00000282317	Coexpression with indicated gene
coexp_ENSG00000226913	Coexpression with indicated gene
coexp_ENSG00000266290	Coexpression with indicated gene
coexp_ENSG00000271065	Coexpression with indicated gene
coexp_ENSG00000233086	Coexpression with indicated gene
coexp_ENSG00000223982	Coexpression with indicated gene
coexp_ENSG00000167459	Coexpression with indicated gene
coexp_ENSG00000258464	Coexpression with indicated gene
coexp_ENSG00000182814	Coexpression with indicated gene
coexp_ENSG00000246876	Coexpression with indicated gene
coexp_ENSG00000269321	Coexpression with indicated gene
coexp_ENSG00000153779	Coexpression with indicated gene
coexp_ENSG00000231364	Coexpression with indicated gene
coexp_ENSG00000158553	Coexpression with indicated gene
coexp_ENSG00000230550	Coexpression with indicated gene
coexp_ENSG00000283072	Coexpression with indicated gene
coexp_ENSG00000203335	Coexpression with indicated gene
coexp_ENSG00000234942	Coexpression with indicated gene
coexp_ENSG00000245248	Coexpression with indicated gene
coexp_ENSG00000261738	Coexpression with indicated gene
coexp_ENSG00000237964	Coexpression with indicated gene
coexp_ENSG00000266950	Coexpression with indicated gene
coexp_ENSG00000256888	Coexpression with indicated gene
coexp_ENSG00000259170	Coexpression with indicated gene
coexp_ENSG00000237435	Coexpression with indicated gene
coexp_ENSG00000234402	Coexpression with indicated gene
coexp_ENSG00000233208	Coexpression with indicated gene
coexp_ENSG00000178248	Coexpression with indicated gene
coexp_ENSG00000267777	Coexpression with indicated gene
coexp_ENSG00000243981	Coexpression with indicated gene
coexp_ENSG00000231902	Coexpression with indicated gene
coexp_ENSG00000234008	Coexpression with indicated gene
coexp_ENSG00000242641	Coexpression with indicated gene
coexp_ENSG00000258716	Coexpression with indicated gene
coexp_ENSG00000184647	Coexpression with indicated gene
coexp_ENSG00000281548	Coexpression with indicated gene
coexp_ENSG00000251649	Coexpression with indicated gene
coexp_ENSG00000274330	Coexpression with indicated gene
coexp_ENSG00000275139	Coexpression with indicated gene
coexp_ENSG00000224382	Coexpression with indicated gene
coexp_ENSG00000077800	Coexpression with indicated gene
coexp_ENSG00000176635	Coexpression with indicated gene
coexp_ENSG00000163806	Coexpression with indicated gene
coexp_ENSG00000237675	Coexpression with indicated gene
coexp_ENSG00000249727	Coexpression with indicated gene
coexp_ENSG00000260392	Coexpression with indicated gene
coexp_ENSG00000243062	Coexpression with indicated gene
coexp_ENSG00000251175	Coexpression with indicated gene
coexp_ENSG00000260830	Coexpression with indicated gene
coexp_ENSG00000204390	Coexpression with indicated gene
coexp_ENSG00000253199	Coexpression with indicated gene
coexp_ENSG00000256596	Coexpression with indicated gene
coexp_ENSG00000150773	Coexpression with indicated gene
coexp_ENSG00000240280	Coexpression with indicated gene
coexp_ENSG00000175294	Coexpression with indicated gene
coexp_ENSG00000257199	Coexpression with indicated gene
coexp_ENSG00000253551	Coexpression with indicated gene
coexp_ENSG00000198870	Coexpression with indicated gene
coexp_ENSG00000260785	Coexpression with indicated gene
coexp_ENSG00000254018	Coexpression with indicated gene
coexp_ENSG00000261002	Coexpression with indicated gene
coexp_ENSG00000122304	Coexpression with indicated gene
coexp_ENSG00000165807	Coexpression with indicated gene
coexp_ENSG00000249808	Coexpression with indicated gene
coexp_ENSG00000243319	Coexpression with indicated gene
coexp_ENSG00000244302	Coexpression with indicated gene
coexp_ENSG00000225249	Coexpression with indicated gene
coexp_ENSG00000259555	Coexpression with indicated gene
coexp_ENSG00000248555	Coexpression with indicated gene
coexp_ENSG00000228897	Coexpression with indicated gene
coexp_ENSG00000166926	Coexpression with indicated gene
coexp_ENSG00000283083	Coexpression with indicated gene
coexp_ENSG00000250930	Coexpression with indicated gene
coexp_ENSG00000271395	Coexpression with indicated gene
coexp_ENSG00000255269	Coexpression with indicated gene
coexp_ENSG00000232633	Coexpression with indicated gene
coexp_ENSG00000249638	Coexpression with indicated gene
coexp_ENSG00000261741	Coexpression with indicated gene
coexp_ENSG00000254222	Coexpression with indicated gene
coexp_ENSG00000231188	Coexpression with indicated gene
coexp_ENSG00000260777	Coexpression with indicated gene
coexp_ENSG00000272514	Coexpression with indicated gene
coexp_ENSG00000185662	Coexpression with indicated gene
coexp_ENSG00000248686	Coexpression with indicated gene
coexp_ENSG00000259320	Coexpression with indicated gene
coexp_ENSG00000262352	Coexpression with indicated gene
coexp_ENSG00000237048	Coexpression with indicated gene
coexp_ENSG00000227255	Coexpression with indicated gene
coexp_ENSG00000239767	Coexpression with indicated gene
coexp_ENSG00000253479	Coexpression with indicated gene
coexp_ENSG00000229606	Coexpression with indicated gene
coexp_ENSG00000248682	Coexpression with indicated gene
coexp_ENSG00000228350	Coexpression with indicated gene
coexp_ENSG00000284209	Coexpression with indicated gene
coexp_ENSG00000227043	Coexpression with indicated gene
coexp_ENSG00000259245	Coexpression with indicated gene
coexp_ENSG00000179213	Coexpression with indicated gene
coexp_ENSG00000235285	Coexpression with indicated gene
coexp_ENSG00000259224	Coexpression with indicated gene
coexp_ENSG00000228714	Coexpression with indicated gene
coexp_ENSG00000183470	Coexpression with indicated gene
coexp_ENSG00000154608	Coexpression with indicated gene
coexp_ENSG00000164675	Coexpression with indicated gene
coexp_ENSG00000267567	Coexpression with indicated gene
coexp_ENSG00000261398	Coexpression with indicated gene
coexp_ENSG00000277661	Coexpression with indicated gene
coexp_ENSG00000105146	Coexpression with indicated gene
coexp_ENSG00000118245	Coexpression with indicated gene
coexp_ENSG00000244926	Coexpression with indicated gene
coexp_ENSG00000234967	Coexpression with indicated gene
coexp_ENSG00000205442	Coexpression with indicated gene
coexp_ENSG00000205449	Coexpression with indicated gene
coexp_ENSG00000189132	Coexpression with indicated gene
coexp_ENSG00000249693	Coexpression with indicated gene
coexp_ENSG00000206026	Coexpression with indicated gene
coexp_ENSG00000214681	Coexpression with indicated gene
coexp_ENSG00000280440	Coexpression with indicated gene
coexp_ENSG00000118156	Coexpression with indicated gene
coexp_ENSG00000226320	Coexpression with indicated gene
coexp_ENSG00000257987	Coexpression with indicated gene
coexp_ENSG00000217258	Coexpression with indicated gene
coexp_ENSG00000151005	Coexpression with indicated gene
coexp_ENSG00000226304	Coexpression with indicated gene
coexp_ENSG00000246394	Coexpression with indicated gene
coexp_ENSG00000233643	Coexpression with indicated gene
coexp_ENSG00000223910	Coexpression with indicated gene
coexp_ENSG00000232624	Coexpression with indicated gene
coexp_ENSG00000164299	Coexpression with indicated gene
coexp_ENSG00000259011	Coexpression with indicated gene
coexp_ENSG00000173464	Coexpression with indicated gene
coexp_ENSG00000178804	Coexpression with indicated gene
coexp_ENSG00000140932	Coexpression with indicated gene
coexp_ENSG00000185689	Coexpression with indicated gene
coexp_ENSG00000229251	Coexpression with indicated gene
coexp_ENSG00000243024	Coexpression with indicated gene
coexp_ENSG00000234736	Coexpression with indicated gene
coexp_ENSG00000239513	Coexpression with indicated gene
coexp_ENSG00000269025	Coexpression with indicated gene
coexp_ENSG00000226722	Coexpression with indicated gene
coexp_ENSG00000256721	Coexpression with indicated gene
coexp_ENSG00000231654	Coexpression with indicated gene
coexp_ENSG00000267026	Coexpression with indicated gene
coexp_ENSG00000264956	Coexpression with indicated gene
coexp_ENSG00000279791	Coexpression with indicated gene
coexp_ENSG00000232727	Coexpression with indicated gene
coexp_ENSG00000247213	Coexpression with indicated gene
coexp_ENSG00000251112	Coexpression with indicated gene
coexp_ENSG00000234948	Coexpression with indicated gene
coexp_ENSG00000175018	Coexpression with indicated gene
coexp_ENSG00000084693	Coexpression with indicated gene
coexp_ENSG00000260520	Coexpression with indicated gene
coexp_ENSG00000245832	Coexpression with indicated gene
coexp_ENSG00000258928	Coexpression with indicated gene
coexp_ENSG00000240777	Coexpression with indicated gene
coexp_ENSG00000206140	Coexpression with indicated gene
coexp_ENSG00000232642	Coexpression with indicated gene
coexp_ENSG00000280446	Coexpression with indicated gene
coexp_ENSG00000184650	Coexpression with indicated gene
coexp_ENSG00000249642	Coexpression with indicated gene
coexp_ENSG00000176679	Coexpression with indicated gene
coexp_ENSG00000227510	Coexpression with indicated gene
coexp_ENSG00000236133	Coexpression with indicated gene
coexp_ENSG00000153165	Coexpression with indicated gene
coexp_ENSG00000254027	Coexpression with indicated gene
coexp_ENSG00000250910	Coexpression with indicated gene
coexp_ENSG00000244203	Coexpression with indicated gene
coexp_ENSG00000258785	Coexpression with indicated gene
coexp_ENSG00000125815	Coexpression with indicated gene
coexp_ENSG00000253887	Coexpression with indicated gene
coexp_ENSG00000248736	Coexpression with indicated gene
coexp_ENSG00000254938	Coexpression with indicated gene
coexp_ENSG00000187969	Coexpression with indicated gene
coexp_ENSG00000203643	Coexpression with indicated gene
coexp_ENSG00000266908	Coexpression with indicated gene
coexp_ENSG00000216937	Coexpression with indicated gene
coexp_ENSG00000234361	Coexpression with indicated gene
coexp_ENSG00000171872	Coexpression with indicated gene
coexp_ENSG00000233220	Coexpression with indicated gene
coexp_ENSG00000241317	Coexpression with indicated gene
coexp_ENSG00000230174	Coexpression with indicated gene
coexp_ENSG00000255458	Coexpression with indicated gene
coexp_ENSG00000250316	Coexpression with indicated gene
coexp_ENSG00000251445	Coexpression with indicated gene
coexp_ENSG00000185958	Coexpression with indicated gene
coexp_ENSG00000237479	Coexpression with indicated gene
coexp_ENSG00000250544	Coexpression with indicated gene
coexp_ENSG00000181013	Coexpression with indicated gene
coexp_ENSG00000235749	Coexpression with indicated gene
coexp_ENSG00000230680	Coexpression with indicated gene
coexp_ENSG00000203876	Coexpression with indicated gene
coexp_ENSG00000176083	Coexpression with indicated gene
coexp_ENSG00000229703	Coexpression with indicated gene
coexp_ENSG00000174225	Coexpression with indicated gene
coexp_ENSG00000249725	Coexpression with indicated gene
coexp_ENSG00000257612	Coexpression with indicated gene
coexp_ENSG00000253577	Coexpression with indicated gene
coexp_ENSG00000175646	Coexpression with indicated gene
coexp_ENSG00000124915	Coexpression with indicated gene
coexp_ENSG00000244588	Coexpression with indicated gene
coexp_ENSG00000165972	Coexpression with indicated gene
coexp_ENSG00000224467	Coexpression with indicated gene
coexp_ENSG00000240747	Coexpression with indicated gene
coexp_ENSG00000204815	Coexpression with indicated gene
coexp_ENSG00000255998	Coexpression with indicated gene
coexp_ENSG00000249346	Coexpression with indicated gene
coexp_ENSG00000104755	Coexpression with indicated gene
coexp_ENSG00000261394	Coexpression with indicated gene
coexp_ENSG00000236244	Coexpression with indicated gene
coexp_ENSG00000231254	Coexpression with indicated gene
coexp_ENSG00000180697	Coexpression with indicated gene
coexp_ENSG00000251024	Coexpression with indicated gene
coexp_ENSG00000177294	Coexpression with indicated gene
coexp_ENSG00000185294	Coexpression with indicated gene
coexp_ENSG00000274600	Coexpression with indicated gene
coexp_ENSG00000203690	Coexpression with indicated gene
coexp_ENSG00000260202	Coexpression with indicated gene
coexp_ENSG00000234169	Coexpression with indicated gene
coexp_ENSG00000273783	Coexpression with indicated gene
coexp_ENSG00000240632	Coexpression with indicated gene
coexp_ENSG00000239994	Coexpression with indicated gene
coexp_ENSG00000164123	Coexpression with indicated gene
coexp_ENSG00000165182	Coexpression with indicated gene
coexp_ENSG00000069206	Coexpression with indicated gene
coexp_ENSG00000280262	Coexpression with indicated gene
coexp_ENSG00000250062	Coexpression with indicated gene
coexp_ENSG00000165076	Coexpression with indicated gene
coexp_ENSG00000247867	Coexpression with indicated gene
coexp_ENSG00000276436	Coexpression with indicated gene
coexp_ENSG00000254357	Coexpression with indicated gene
coexp_ENSG00000267039	Coexpression with indicated gene
coexp_ENSG00000185955	Coexpression with indicated gene
coexp_ENSG00000260021	Coexpression with indicated gene
coexp_ENSG00000227087	Coexpression with indicated gene
coexp_ENSG00000253974	Coexpression with indicated gene
coexp_ENSG00000205858	Coexpression with indicated gene
coexp_ENSG00000249053	Coexpression with indicated gene
coexp_ENSG00000242512	Coexpression with indicated gene
coexp_ENSG00000231114	Coexpression with indicated gene
coexp_ENSG00000261449	Coexpression with indicated gene
coexp_ENSG00000279935	Coexpression with indicated gene
coexp_ENSG00000236336	Coexpression with indicated gene
coexp_ENSG00000229437	Coexpression with indicated gene
coexp_ENSG00000230015	Coexpression with indicated gene
coexp_ENSG00000259878	Coexpression with indicated gene
coexp_ENSG00000266979	Coexpression with indicated gene
coexp_ENSG00000133980	Coexpression with indicated gene
coexp_ENSG00000130270	Coexpression with indicated gene
coexp_ENSG00000118557	Coexpression with indicated gene
coexp_ENSG00000227101	Coexpression with indicated gene
coexp_ENSG00000183643	Coexpression with indicated gene
coexp_ENSG00000258422	Coexpression with indicated gene
coexp_ENSG00000178257	Coexpression with indicated gene
coexp_ENSG00000259585	Coexpression with indicated gene
coexp_ENSG00000256906	Coexpression with indicated gene
coexp_ENSG00000253711	Coexpression with indicated gene
coexp_ENSG00000259788	Coexpression with indicated gene
coexp_ENSG00000257771	Coexpression with indicated gene
coexp_ENSG00000253283	Coexpression with indicated gene
coexp_ENSG00000230891	Coexpression with indicated gene
coexp_ENSG00000249747	Coexpression with indicated gene
coexp_ENSG00000235824	Coexpression with indicated gene
coexp_ENSG00000259708	Coexpression with indicated gene
coexp_ENSG00000218305	Coexpression with indicated gene
coexp_ENSG00000259425	Coexpression with indicated gene
coexp_ENSG00000271171	Coexpression with indicated gene
coexp_ENSG00000260519	Coexpression with indicated gene
coexp_ENSG00000203907	Coexpression with indicated gene
coexp_ENSG00000240766	Coexpression with indicated gene
coexp_ENSG00000276407	Coexpression with indicated gene
coexp_ENSG00000258128	Coexpression with indicated gene
coexp_ENSG00000253584	Coexpression with indicated gene
coexp_ENSG00000267057	Coexpression with indicated gene
coexp_ENSG00000175773	Coexpression with indicated gene
coexp_ENSG00000186453	Coexpression with indicated gene
coexp_ENSG00000242911	Coexpression with indicated gene
coexp_ENSG00000205396	Coexpression with indicated gene
coexp_ENSG00000254654	Coexpression with indicated gene
coexp_ENSG00000196862	Coexpression with indicated gene
coexp_ENSG00000176927	Coexpression with indicated gene
coexp_ENSG00000255236	Coexpression with indicated gene
coexp_ENSG00000120440	Coexpression with indicated gene
coexp_ENSG00000235415	Coexpression with indicated gene
coexp_ENSG00000261749	Coexpression with indicated gene
coexp_ENSG00000261465	Coexpression with indicated gene
coexp_ENSG00000232395	Coexpression with indicated gene
coexp_ENSG00000157330	Coexpression with indicated gene
coexp_ENSG00000128346	Coexpression with indicated gene
coexp_ENSG00000280180	Coexpression with indicated gene
coexp_ENSG00000237992	Coexpression with indicated gene
coexp_ENSG00000259912	Coexpression with indicated gene
coexp_ENSG00000164500	Coexpression with indicated gene
coexp_ENSG00000166984	Coexpression with indicated gene
coexp_ENSG00000257636	Coexpression with indicated gene
coexp_ENSG00000261439	Coexpression with indicated gene
coexp_ENSG00000234767	Coexpression with indicated gene
coexp_ENSG00000227021	Coexpression with indicated gene
coexp_ENSG00000257083	Coexpression with indicated gene
coexp_ENSG00000260857	Coexpression with indicated gene
coexp_ENSG00000256286	Coexpression with indicated gene
coexp_ENSG00000188375	Coexpression with indicated gene
coexp_ENSG00000225479	Coexpression with indicated gene
coexp_ENSG00000232712	Coexpression with indicated gene
coexp_ENSG00000177994	Coexpression with indicated gene
coexp_ENSG00000203987	Coexpression with indicated gene
coexp_ENSG00000235570	Coexpression with indicated gene
coexp_ENSG00000250448	Coexpression with indicated gene
coexp_ENSG00000271968	Coexpression with indicated gene
coexp_ENSG00000277369	Coexpression with indicated gene
coexp_ENSG00000236894	Coexpression with indicated gene
coexp_ENSG00000263563	Coexpression with indicated gene
coexp_ENSG00000213140	Coexpression with indicated gene
coexp_ENSG00000105467	Coexpression with indicated gene
coexp_ENSG00000167094	Coexpression with indicated gene
coexp_ENSG00000247363	Coexpression with indicated gene
coexp_ENSG00000232490	Coexpression with indicated gene
coexp_ENSG00000234988	Coexpression with indicated gene
coexp_ENSG00000249163	Coexpression with indicated gene
coexp_ENSG00000224074	Coexpression with indicated gene
coexp_ENSG00000256120	Coexpression with indicated gene
coexp_ENSG00000279072	Coexpression with indicated gene
coexp_ENSG00000173421	Coexpression with indicated gene
coexp_ENSG00000250024	Coexpression with indicated gene
coexp_ENSG00000259862	Coexpression with indicated gene
coexp_ENSG00000267712	Coexpression with indicated gene
coexp_ENSG00000279936	Coexpression with indicated gene
coexp_ENSG00000245857	Coexpression with indicated gene
coexp_ENSG00000197889	Coexpression with indicated gene
coexp_ENSG00000267529	Coexpression with indicated gene
coexp_ENSG00000225945	Coexpression with indicated gene
coexp_ENSG00000119703	Coexpression with indicated gene
coexp_ENSG00000175513	Coexpression with indicated gene
coexp_ENSG00000223440	Coexpression with indicated gene
coexp_ENSG00000167014	Coexpression with indicated gene
coexp_ENSG00000227929	Coexpression with indicated gene
coexp_ENSG00000248764	Coexpression with indicated gene
coexp_ENSG00000078795	Coexpression with indicated gene
coexp_ENSG00000231128	Coexpression with indicated gene
coexp_ENSG00000235410	Coexpression with indicated gene
coexp_ENSG00000189134	Coexpression with indicated gene
coexp_ENSG00000219700	Coexpression with indicated gene
coexp_ENSG00000242715	Coexpression with indicated gene
coexp_ENSG00000231528	Coexpression with indicated gene
coexp_ENSG00000225493	Coexpression with indicated gene
coexp_ENSG00000258553	Coexpression with indicated gene
coexp_ENSG00000280426	Coexpression with indicated gene
coexp_ENSG00000183396	Coexpression with indicated gene
coexp_ENSG00000253859	Coexpression with indicated gene
coexp_ENSG00000257129	Coexpression with indicated gene
coexp_ENSG00000256699	Coexpression with indicated gene
coexp_ENSG00000249715	Coexpression with indicated gene
coexp_ENSG00000258484	Coexpression with indicated gene
coexp_ENSG00000180336	Coexpression with indicated gene
coexp_ENSG00000270544	Coexpression with indicated gene
coexp_ENSG00000186334	Coexpression with indicated gene
coexp_ENSG00000253740	Coexpression with indicated gene
coexp_ENSG00000231933	Coexpression with indicated gene
coexp_ENSG00000142606	Coexpression with indicated gene
coexp_ENSG00000240963	Coexpression with indicated gene
coexp_ENSG00000248118	Coexpression with indicated gene
coexp_ENSG00000234303	Coexpression with indicated gene
coexp_ENSG00000283459	Coexpression with indicated gene
coexp_ENSG00000267564	Coexpression with indicated gene
coexp_ENSG00000234267	Coexpression with indicated gene
coexp_ENSG00000178412	Coexpression with indicated gene
coexp_ENSG00000257748	Coexpression with indicated gene
coexp_ENSG00000235461	Coexpression with indicated gene
coexp_ENSG00000231883	Coexpression with indicated gene
coexp_ENSG00000235343	Coexpression with indicated gene
coexp_ENSG00000230013	Coexpression with indicated gene
coexp_ENSG00000159289	Coexpression with indicated gene
coexp_ENSG00000235911	Coexpression with indicated gene
coexp_ENSG00000205838	Coexpression with indicated gene
coexp_ENSG00000242703	Coexpression with indicated gene
coexp_ENSG00000237057	Coexpression with indicated gene
coexp_ENSG00000249618	Coexpression with indicated gene
coexp_ENSG00000249787	Coexpression with indicated gene
coexp_ENSG00000242950	Coexpression with indicated gene
coexp_ENSG00000224209	Coexpression with indicated gene
coexp_ENSG00000231538	Coexpression with indicated gene
coexp_ENSG00000246863	Coexpression with indicated gene
coexp_ENSG00000278023	Coexpression with indicated gene
coexp_ENSG00000197503	Coexpression with indicated gene
coexp_ENSG00000248483	Coexpression with indicated gene
coexp_ENSG00000236581	Coexpression with indicated gene
coexp_ENSG00000255546	Coexpression with indicated gene
coexp_ENSG00000157884	Coexpression with indicated gene
coexp_ENSG00000241621	Coexpression with indicated gene
coexp_ENSG00000167646	Coexpression with indicated gene
coexp_ENSG00000224128	Coexpression with indicated gene
coexp_ENSG00000256115	Coexpression with indicated gene
coexp_ENSG00000271649	Coexpression with indicated gene
coexp_ENSG00000223734	Coexpression with indicated gene
coexp_ENSG00000241696	Coexpression with indicated gene
coexp_ENSG00000100583	Coexpression with indicated gene
coexp_ENSG00000225652	Coexpression with indicated gene
coexp_ENSG00000235470	Coexpression with indicated gene
coexp_ENSG00000257746	Coexpression with indicated gene
coexp_ENSG00000233985	Coexpression with indicated gene
coexp_ENSG00000254095	Coexpression with indicated gene
coexp_ENSG00000231040	Coexpression with indicated gene
coexp_ENSG00000253781	Coexpression with indicated gene
coexp_ENSG00000238205	Coexpression with indicated gene
coexp_ENSG00000230010	Coexpression with indicated gene
coexp_ENSG00000220660	Coexpression with indicated gene
coexp_ENSG00000236986	Coexpression with indicated gene
coexp_ENSG00000261751	Coexpression with indicated gene
coexp_ENSG00000225102	Coexpression with indicated gene
coexp_ENSG00000228918	Coexpression with indicated gene
coexp_ENSG00000229086	Coexpression with indicated gene
coexp_ENSG00000232294	Coexpression with indicated gene
coexp_ENSG00000256342	Coexpression with indicated gene
coexp_ENSG00000169214	Coexpression with indicated gene
coexp_ENSG00000205913	Coexpression with indicated gene
coexp_ENSG00000124721	Coexpression with indicated gene
coexp_ENSG00000228884	Coexpression with indicated gene
coexp_ENSG00000196335	Coexpression with indicated gene
coexp_ENSG00000229869	Coexpression with indicated gene
coexp_ENSG00000064199	Coexpression with indicated gene
coexp_ENSG00000226009	Coexpression with indicated gene
coexp_ENSG00000177558	Coexpression with indicated gene
coexp_ENSG00000261760	Coexpression with indicated gene
coexp_ENSG00000162641	Coexpression with indicated gene
coexp_ENSG00000153347	Coexpression with indicated gene
coexp_ENSG00000230971	Coexpression with indicated gene
coexp_ENSG00000233587	Coexpression with indicated gene
coexp_ENSG00000213438	Coexpression with indicated gene
coexp_ENSG00000261683	Coexpression with indicated gene
coexp_ENSG00000132972	Coexpression with indicated gene
coexp_ENSG00000257741	Coexpression with indicated gene
coexp_ENSG00000198173	Coexpression with indicated gene
coexp_ENSG00000175664	Coexpression with indicated gene
coexp_ENSG00000255359	Coexpression with indicated gene
coexp_ENSG00000261046	Coexpression with indicated gene
coexp_ENSG00000255133	Coexpression with indicated gene
coexp_ENSG00000255344	Coexpression with indicated gene
coexp_ENSG00000264990	Coexpression with indicated gene
coexp_ENSG00000220483	Coexpression with indicated gene
coexp_ENSG00000232749	Coexpression with indicated gene
coexp_ENSG00000268845	Coexpression with indicated gene
coexp_ENSG00000170629	Coexpression with indicated gene
coexp_ENSG00000256022	Coexpression with indicated gene
coexp_ENSG00000279818	Coexpression with indicated gene
coexp_ENSG00000145850	Coexpression with indicated gene
coexp_ENSG00000241577	Coexpression with indicated gene
coexp_ENSG00000258220	Coexpression with indicated gene
coexp_ENSG00000250102	Coexpression with indicated gene
coexp_ENSG00000120555	Coexpression with indicated gene
coexp_ENSG00000233069	Coexpression with indicated gene
coexp_ENSG00000260240	Coexpression with indicated gene
coexp_ENSG00000235455	Coexpression with indicated gene
coexp_ENSG00000224311	Coexpression with indicated gene
coexp_ENSG00000247131	Coexpression with indicated gene
coexp_ENSG00000204300	Coexpression with indicated gene
coexp_ENSG00000260071	Coexpression with indicated gene
coexp_ENSG00000138068	Coexpression with indicated gene
coexp_ENSG00000231575	Coexpression with indicated gene
coexp_ENSG00000183977	Coexpression with indicated gene
coexp_ENSG00000260389	Coexpression with indicated gene
coexp_ENSG00000225050	Coexpression with indicated gene
coexp_ENSG00000165863	Coexpression with indicated gene
coexp_ENSG00000258731	Coexpression with indicated gene
coexp_ENSG00000276508	Coexpression with indicated gene
coexp_ENSG00000259035	Coexpression with indicated gene
coexp_ENSG00000253147	Coexpression with indicated gene
coexp_ENSG00000258747	Coexpression with indicated gene
coexp_ENSG00000282527	Coexpression with indicated gene
coexp_ENSG00000131914	Coexpression with indicated gene
coexp_ENSG00000280417	Coexpression with indicated gene
coexp_ENSG00000233605	Coexpression with indicated gene
coexp_ENSG00000213547	Coexpression with indicated gene
coexp_ENSG00000249479	Coexpression with indicated gene
coexp_ENSG00000258502	Coexpression with indicated gene
coexp_ENSG00000251339	Coexpression with indicated gene
coexp_ENSG00000232031	Coexpression with indicated gene
coexp_ENSG00000187186	Coexpression with indicated gene
coexp_ENSG00000257456	Coexpression with indicated gene
coexp_ENSG00000186583	Coexpression with indicated gene
coexp_ENSG00000281731	Coexpression with indicated gene
coexp_ENSG00000206552	Coexpression with indicated gene
coexp_ENSG00000162763	Coexpression with indicated gene
coexp_ENSG00000260278	Coexpression with indicated gene
coexp_ENSG00000266053	Coexpression with indicated gene
coexp_ENSG00000230894	Coexpression with indicated gene
coexp_ENSG00000166930	Coexpression with indicated gene
coexp_ENSG00000179766	Coexpression with indicated gene
coexp_ENSG00000254508	Coexpression with indicated gene
coexp_ENSG00000232843	Coexpression with indicated gene
coexp_ENSG00000254066	Coexpression with indicated gene
coexp_ENSG00000260062	Coexpression with indicated gene
coexp_ENSG00000242385	Coexpression with indicated gene
coexp_ENSG00000261024	Coexpression with indicated gene
coexp_ENSG00000271776	Coexpression with indicated gene
coexp_ENSG00000258977	Coexpression with indicated gene
coexp_ENSG00000198526	Coexpression with indicated gene
coexp_ENSG00000259290	Coexpression with indicated gene
coexp_ENSG00000246820	Coexpression with indicated gene
coexp_ENSG00000250576	Coexpression with indicated gene
coexp_ENSG00000259998	Coexpression with indicated gene
coexp_ENSG00000182950	Coexpression with indicated gene
coexp_ENSG00000258516	Coexpression with indicated gene
coexp_ENSG00000254811	Coexpression with indicated gene
coexp_ENSG00000250250	Coexpression with indicated gene
coexp_ENSG00000269037	Coexpression with indicated gene
coexp_ENSG00000234511	Coexpression with indicated gene
coexp_ENSG00000221900	Coexpression with indicated gene
coexp_ENSG00000220161	Coexpression with indicated gene
coexp_ENSG00000234795	Coexpression with indicated gene
coexp_ENSG00000231061	Coexpression with indicated gene
coexp_ENSG00000177369	Coexpression with indicated gene
coexp_ENSG00000279770	Coexpression with indicated gene
coexp_ENSG00000225263	Coexpression with indicated gene
coexp_ENSG00000179994	Coexpression with indicated gene
coexp_ENSG00000165113	Coexpression with indicated gene
coexp_ENSG00000258285	Coexpression with indicated gene
coexp_ENSG00000130950	Coexpression with indicated gene
coexp_ENSG00000235202	Coexpression with indicated gene
coexp_ENSG00000106304	Coexpression with indicated gene
coexp_ENSG00000242524	Coexpression with indicated gene
coexp_ENSG00000243636	Coexpression with indicated gene
coexp_ENSG00000227925	Coexpression with indicated gene
coexp_ENSG00000247877	Coexpression with indicated gene
coexp_ENSG00000223598	Coexpression with indicated gene
coexp_ENSG00000266614	Coexpression with indicated gene
coexp_ENSG00000249645	Coexpression with indicated gene
coexp_ENSG00000118491	Coexpression with indicated gene
coexp_ENSG00000253447	Coexpression with indicated gene
coexp_ENSG00000260288	Coexpression with indicated gene
coexp_ENSG00000261190	Coexpression with indicated gene
coexp_ENSG00000125823	Coexpression with indicated gene
coexp_ENSG00000267262	Coexpression with indicated gene
coexp_ENSG00000233644	Coexpression with indicated gene
coexp_ENSG00000122728	Coexpression with indicated gene
coexp_ENSG00000273919	Coexpression with indicated gene
coexp_ENSG00000246422	Coexpression with indicated gene
coexp_ENSG00000232812	Coexpression with indicated gene
coexp_ENSG00000261800	Coexpression with indicated gene
coexp_ENSG00000224353	Coexpression with indicated gene
coexp_ENSG00000225703	Coexpression with indicated gene
coexp_ENSG00000172404	Coexpression with indicated gene
coexp_ENSG00000227011	Coexpression with indicated gene
coexp_ENSG00000260093	Coexpression with indicated gene
coexp_ENSG00000234089	Coexpression with indicated gene
coexp_ENSG00000272371	Coexpression with indicated gene
coexp_ENSG00000235076	Coexpression with indicated gene
coexp_ENSG00000283849	Coexpression with indicated gene
coexp_ENSG00000238098	Coexpression with indicated gene
coexp_ENSG00000277527	Coexpression with indicated gene
coexp_ENSG00000224046	Coexpression with indicated gene
coexp_ENSG00000227352	Coexpression with indicated gene
coexp_ENSG00000267695	Coexpression with indicated gene
coexp_ENSG00000261621	Coexpression with indicated gene
coexp_ENSG00000260473	Coexpression with indicated gene
coexp_ENSG00000264212	Coexpression with indicated gene
coexp_ENSG00000249084	Coexpression with indicated gene
coexp_ENSG00000251081	Coexpression with indicated gene
coexp_ENSG00000214347	Coexpression with indicated gene
coexp_ENSG00000248467	Coexpression with indicated gene
coexp_ENSG00000240152	Coexpression with indicated gene
coexp_ENSG00000226037	Coexpression with indicated gene
coexp_ENSG00000234445	Coexpression with indicated gene
coexp_ENSG00000255714	Coexpression with indicated gene
coexp_ENSG00000278849	Coexpression with indicated gene
coexp_ENSG00000272556	Coexpression with indicated gene
coexp_ENSG00000237092	Coexpression with indicated gene
coexp_ENSG00000187624	Coexpression with indicated gene
coexp_ENSG00000254049	Coexpression with indicated gene
coexp_ENSG00000276854	Coexpression with indicated gene
coexp_ENSG00000232243	Coexpression with indicated gene
coexp_ENSG00000063127	Coexpression with indicated gene
coexp_ENSG00000228636	Coexpression with indicated gene
coexp_ENSG00000075702	Coexpression with indicated gene
coexp_ENSG00000263684	Coexpression with indicated gene
coexp_ENSG00000238141	Coexpression with indicated gene
coexp_ENSG00000230563	Coexpression with indicated gene
coexp_ENSG00000257155	Coexpression with indicated gene
coexp_ENSG00000221888	Coexpression with indicated gene
coexp_ENSG00000272281	Coexpression with indicated gene
coexp_ENSG00000279711	Coexpression with indicated gene
coexp_ENSG00000004809	Coexpression with indicated gene
coexp_ENSG00000234474	Coexpression with indicated gene
coexp_ENSG00000253279	Coexpression with indicated gene
coexp_ENSG00000242242	Coexpression with indicated gene
coexp_ENSG00000180846	Coexpression with indicated gene
coexp_ENSG00000261156	Coexpression with indicated gene
coexp_ENSG00000226655	Coexpression with indicated gene
coexp_ENSG00000253301	Coexpression with indicated gene
coexp_ENSG00000233708	Coexpression with indicated gene
coexp_ENSG00000237174	Coexpression with indicated gene
coexp_ENSG00000228750	Coexpression with indicated gene
coexp_ENSG00000213067	Coexpression with indicated gene
coexp_ENSG00000230698	Coexpression with indicated gene
coexp_ENSG00000163012	Coexpression with indicated gene
coexp_ENSG00000233729	Coexpression with indicated gene
coexp_ENSG00000233656	Coexpression with indicated gene
coexp_ENSG00000237853	Coexpression with indicated gene
coexp_ENSG00000249961	Coexpression with indicated gene
coexp_ENSG00000231173	Coexpression with indicated gene
coexp_ENSG00000226488	Coexpression with indicated gene
coexp_ENSG00000235731	Coexpression with indicated gene
coexp_ENSG00000251350	Coexpression with indicated gene
coexp_ENSG00000254980	Coexpression with indicated gene
coexp_ENSG00000233993	Coexpression with indicated gene
coexp_ENSG00000188280	Coexpression with indicated gene
coexp_ENSG00000260714	Coexpression with indicated gene
coexp_ENSG00000233633	Coexpression with indicated gene
coexp_ENSG00000228115	Coexpression with indicated gene
coexp_ENSG00000233536	Coexpression with indicated gene
coexp_ENSG00000196946	Coexpression with indicated gene
coexp_ENSG00000162843	Coexpression with indicated gene
coexp_ENSG00000170703	Coexpression with indicated gene
coexp_ENSG00000267743	Coexpression with indicated gene
coexp_ENSG00000242781	Coexpression with indicated gene
coexp_ENSG00000256292	Coexpression with indicated gene
coexp_ENSG00000201816	Coexpression with indicated gene
coexp_ENSG00000203498	Coexpression with indicated gene
coexp_ENSG00000267627	Coexpression with indicated gene
coexp_ENSG00000278239	Coexpression with indicated gene
coexp_ENSG00000250626	Coexpression with indicated gene
coexp_ENSG00000267293	Coexpression with indicated gene
coexp_ENSG00000251072	Coexpression with indicated gene
coexp_ENSG00000215117	Coexpression with indicated gene
coexp_ENSG00000226079	Coexpression with indicated gene
coexp_ENSG00000257095	Coexpression with indicated gene
coexp_ENSG00000267024	Coexpression with indicated gene
coexp_ENSG00000239300	Coexpression with indicated gene
coexp_ENSG00000230789	Coexpression with indicated gene
coexp_ENSG00000268078	Coexpression with indicated gene
coexp_ENSG00000233183	Coexpression with indicated gene
coexp_ENSG00000163746	Coexpression with indicated gene
coexp_ENSG00000258487	Coexpression with indicated gene
coexp_ENSG00000250261	Coexpression with indicated gene
coexp_ENSG00000260932	Coexpression with indicated gene
coexp_ENSG00000242925	Coexpression with indicated gene
coexp_ENSG00000175820	Coexpression with indicated gene
coexp_ENSG00000134007	Coexpression with indicated gene
coexp_ENSG00000117971	Coexpression with indicated gene
coexp_ENSG00000280086	Coexpression with indicated gene
coexp_ENSG00000266446	Coexpression with indicated gene
coexp_ENSG00000259082	Coexpression with indicated gene
coexp_ENSG00000254242	Coexpression with indicated gene
coexp_ENSG00000225424	Coexpression with indicated gene
coexp_ENSG00000238185	Coexpression with indicated gene
coexp_ENSG00000101251	Coexpression with indicated gene
coexp_ENSG00000279065	Coexpression with indicated gene
coexp_ENSG00000196242	Coexpression with indicated gene
coexp_ENSG00000248607	Coexpression with indicated gene
coexp_ENSG00000260840	Coexpression with indicated gene
coexp_ENSG00000249065	Coexpression with indicated gene
coexp_ENSG00000249085	Coexpression with indicated gene
coexp_ENSG00000167523	Coexpression with indicated gene
coexp_ENSG00000254372	Coexpression with indicated gene
coexp_ENSG00000279498	Coexpression with indicated gene
coexp_ENSG00000215817	Coexpression with indicated gene
coexp_ENSG00000280278	Coexpression with indicated gene
coexp_ENSG00000259720	Coexpression with indicated gene
coexp_ENSG00000234296	Coexpression with indicated gene
coexp_ENSG00000175518	Coexpression with indicated gene
coexp_ENSG00000250033	Coexpression with indicated gene
coexp_ENSG00000249269	Coexpression with indicated gene
coexp_ENSG00000211707	Coexpression with indicated gene
coexp_ENSG00000243918	Coexpression with indicated gene
coexp_ENSG00000244502	Coexpression with indicated gene
coexp_ENSG00000228259	Coexpression with indicated gene
coexp_ENSG00000236319	Coexpression with indicated gene
coexp_ENSG00000188368	Coexpression with indicated gene
coexp_ENSG00000267061	Coexpression with indicated gene
coexp_ENSG00000258066	Coexpression with indicated gene
coexp_ENSG00000125207	Coexpression with indicated gene
coexp_ENSG00000270610	Coexpression with indicated gene
coexp_ENSG00000234300	Coexpression with indicated gene
coexp_ENSG00000258725	Coexpression with indicated gene
coexp_ENSG00000261014	Coexpression with indicated gene
coexp_ENSG00000241764	Coexpression with indicated gene
coexp_ENSG00000260564	Coexpression with indicated gene
coexp_ENSG00000251545	Coexpression with indicated gene
coexp_ENSG00000235497	Coexpression with indicated gene
coexp_ENSG00000228669	Coexpression with indicated gene
coexp_ENSG00000226739	Coexpression with indicated gene
coexp_ENSG00000257842	Coexpression with indicated gene
coexp_ENSG00000274167	Coexpression with indicated gene
coexp_ENSG00000264216	Coexpression with indicated gene
coexp_ENSG00000229060	Coexpression with indicated gene
coexp_ENSG00000235138	Coexpression with indicated gene
coexp_ENSG00000168746	Coexpression with indicated gene
coexp_ENSG00000229528	Coexpression with indicated gene
coexp_ENSG00000264242	Coexpression with indicated gene
coexp_ENSG00000228189	Coexpression with indicated gene
coexp_ENSG00000227145	Coexpression with indicated gene
coexp_ENSG00000105672	Coexpression with indicated gene
coexp_ENSG00000259281	Coexpression with indicated gene
coexp_ENSG00000149599	Coexpression with indicated gene
coexp_ENSG00000179902	Coexpression with indicated gene
coexp_ENSG00000267606	Coexpression with indicated gene
coexp_ENSG00000251018	Coexpression with indicated gene
coexp_ENSG00000267401	Coexpression with indicated gene
coexp_ENSG00000226797	Coexpression with indicated gene
coexp_ENSG00000232817	Coexpression with indicated gene
coexp_ENSG00000232265	Coexpression with indicated gene
coexp_ENSG00000228290	Coexpression with indicated gene
coexp_ENSG00000269296	Coexpression with indicated gene
coexp_ENSG00000251371	Coexpression with indicated gene
coexp_ENSG00000229105	Coexpression with indicated gene
coexp_ENSG00000258223	Coexpression with indicated gene
coexp_ENSG00000135951	Coexpression with indicated gene
coexp_ENSG00000236306	Coexpression with indicated gene
coexp_ENSG00000254417	Coexpression with indicated gene
coexp_ENSG00000228680	Coexpression with indicated gene
coexp_ENSG00000185448	Coexpression with indicated gene
coexp_ENSG00000228060	Coexpression with indicated gene
coexp_ENSG00000213252	Coexpression with indicated gene
coexp_ENSG00000182632	Coexpression with indicated gene
coexp_ENSG00000226567	Coexpression with indicated gene
coexp_ENSG00000163923	Coexpression with indicated gene
coexp_ENSG00000258068	Coexpression with indicated gene
coexp_ENSG00000240720	Coexpression with indicated gene
coexp_ENSG00000128596	Coexpression with indicated gene
coexp_ENSG00000168070	Coexpression with indicated gene
coexp_ENSG00000266312	Coexpression with indicated gene
coexp_ENSG00000228308	Coexpression with indicated gene
coexp_ENSG00000256704	Coexpression with indicated gene
coexp_ENSG00000269826	Coexpression with indicated gene
coexp_ENSG00000258556	Coexpression with indicated gene
coexp_ENSG00000265496	Coexpression with indicated gene
coexp_ENSG00000131951	Coexpression with indicated gene
coexp_ENSG00000244155	Coexpression with indicated gene
coexp_ENSG00000259163	Coexpression with indicated gene
coexp_ENSG00000250427	Coexpression with indicated gene
coexp_ENSG00000137225	Coexpression with indicated gene
coexp_ENSG00000241735	Coexpression with indicated gene
coexp_ENSG00000226570	Coexpression with indicated gene
coexp_ENSG00000277103	Coexpression with indicated gene
coexp_ENSG00000278499	Coexpression with indicated gene
coexp_ENSG00000276093	Coexpression with indicated gene
coexp_ENSG00000223815	Coexpression with indicated gene
coexp_ENSG00000180878	Coexpression with indicated gene
coexp_ENSG00000258678	Coexpression with indicated gene
coexp_ENSG00000250313	Coexpression with indicated gene
coexp_ENSG00000254836	Coexpression with indicated gene
coexp_ENSG00000223597	Coexpression with indicated gene
coexp_ENSG00000232197	Coexpression with indicated gene
coexp_ENSG00000178053	Coexpression with indicated gene
coexp_ENSG00000255553	Coexpression with indicated gene
coexp_ENSG00000219294	Coexpression with indicated gene
coexp_ENSG00000231851	Coexpression with indicated gene
coexp_ENSG00000267339	Coexpression with indicated gene
coexp_ENSG00000261470	Coexpression with indicated gene
coexp_ENSG00000231023	Coexpression with indicated gene
coexp_ENSG00000228909	Coexpression with indicated gene
coexp_ENSG00000229775	Coexpression with indicated gene
coexp_ENSG00000225284	Coexpression with indicated gene
coexp_ENSG00000253871	Coexpression with indicated gene
coexp_ENSG00000231867	Coexpression with indicated gene
coexp_ENSG00000142025	Coexpression with indicated gene
coexp_ENSG00000250406	Coexpression with indicated gene
coexp_ENSG00000204052	Coexpression with indicated gene
coexp_ENSG00000152503	Coexpression with indicated gene
coexp_ENSG00000253628	Coexpression with indicated gene
coexp_ENSG00000123594	Coexpression with indicated gene
coexp_ENSG00000225981	Coexpression with indicated gene
coexp_ENSG00000148814	Coexpression with indicated gene
coexp_ENSG00000249521	Coexpression with indicated gene
coexp_ENSG00000242111	Coexpression with indicated gene
coexp_ENSG00000214837	Coexpression with indicated gene
coexp_ENSG00000132749	Coexpression with indicated gene
coexp_ENSG00000260926	Coexpression with indicated gene
coexp_ENSG00000233894	Coexpression with indicated gene
coexp_ENSG00000103832	Coexpression with indicated gene
coexp_ENSG00000214255	Coexpression with indicated gene
coexp_ENSG00000228364	Coexpression with indicated gene
coexp_ENSG00000279134	Coexpression with indicated gene
coexp_ENSG00000260343	Coexpression with indicated gene
coexp_ENSG00000235054	Coexpression with indicated gene
coexp_ENSG00000263110	Coexpression with indicated gene
coexp_ENSG00000259072	Coexpression with indicated gene
coexp_ENSG00000260441	Coexpression with indicated gene
coexp_ENSG00000224761	Coexpression with indicated gene
coexp_ENSG00000268635	Coexpression with indicated gene
coexp_ENSG00000268480	Coexpression with indicated gene
coexp_ENSG00000255167	Coexpression with indicated gene
coexp_ENSG00000230000	Coexpression with indicated gene
coexp_ENSG00000228331	Coexpression with indicated gene
coexp_ENSG00000154611	Coexpression with indicated gene
coexp_ENSG00000234818	Coexpression with indicated gene
coexp_ENSG00000226387	Coexpression with indicated gene
coexp_ENSG00000249748	Coexpression with indicated gene
coexp_ENSG00000229780	Coexpression with indicated gene
coexp_ENSG00000228689	Coexpression with indicated gene
coexp_ENSG00000130943	Coexpression with indicated gene
coexp_ENSG00000002079	Coexpression with indicated gene
coexp_ENSG00000243849	Coexpression with indicated gene
coexp_ENSG00000275540	Coexpression with indicated gene
coexp_ENSG00000179938	Coexpression with indicated gene
coexp_ENSG00000139985	Coexpression with indicated gene
coexp_ENSG00000278084	Coexpression with indicated gene
coexp_ENSG00000267166	Coexpression with indicated gene
coexp_ENSG00000259789	Coexpression with indicated gene
coexp_ENSG00000231204	Coexpression with indicated gene
coexp_ENSG00000255650	Coexpression with indicated gene
coexp_ENSG00000284452	Coexpression with indicated gene
coexp_ENSG00000235166	Coexpression with indicated gene
coexp_ENSG00000229454	Coexpression with indicated gene
coexp_ENSG00000226825	Coexpression with indicated gene
coexp_ENSG00000183496	Coexpression with indicated gene
coexp_ENSG00000177553	Coexpression with indicated gene
coexp_ENSG00000276399	Coexpression with indicated gene
coexp_ENSG00000182645	Coexpression with indicated gene
coexp_ENSG00000226533	Coexpression with indicated gene
coexp_ENSG00000279454	Coexpression with indicated gene
coexp_ENSG00000227744	Coexpression with indicated gene
coexp_ENSG00000186471	Coexpression with indicated gene
coexp_ENSG00000155890	Coexpression with indicated gene
coexp_ENSG00000139908	Coexpression with indicated gene
coexp_ENSG00000222047	Coexpression with indicated gene
coexp_ENSG00000251283	Coexpression with indicated gene
coexp_ENSG00000283982	Coexpression with indicated gene
coexp_ENSG00000180178	Coexpression with indicated gene
coexp_ENSG00000221843	Coexpression with indicated gene
coexp_ENSG00000234452	Coexpression with indicated gene
coexp_ENSG00000253130	Coexpression with indicated gene
coexp_ENSG00000266537	Coexpression with indicated gene
coexp_ENSG00000166359	Coexpression with indicated gene
coexp_ENSG00000256282	Coexpression with indicated gene
coexp_ENSG00000246662	Coexpression with indicated gene
coexp_ENSG00000214484	Coexpression with indicated gene
coexp_ENSG00000227660	Coexpression with indicated gene
coexp_ENSG00000216621	Coexpression with indicated gene
coexp_ENSG00000180042	Coexpression with indicated gene
coexp_ENSG00000242012	Coexpression with indicated gene
coexp_ENSG00000168263	Coexpression with indicated gene
coexp_ENSG00000228799	Coexpression with indicated gene
coexp_ENSG00000226390	Coexpression with indicated gene
coexp_ENSG00000235705	Coexpression with indicated gene
coexp_ENSG00000261803	Coexpression with indicated gene
coexp_ENSG00000267101	Coexpression with indicated gene
coexp_ENSG00000236387	Coexpression with indicated gene
coexp_ENSG00000248388	Coexpression with indicated gene
coexp_ENSG00000255109	Coexpression with indicated gene
coexp_ENSG00000243345	Coexpression with indicated gene
coexp_ENSG00000273308	Coexpression with indicated gene
coexp_ENSG00000260737	Coexpression with indicated gene
coexp_ENSG00000197980	Coexpression with indicated gene
coexp_ENSG00000233620	Coexpression with indicated gene
coexp_ENSG00000204659	Coexpression with indicated gene
coexp_ENSG00000234973	Coexpression with indicated gene
coexp_ENSG00000226174	Coexpression with indicated gene
coexp_ENSG00000182397	Coexpression with indicated gene
coexp_ENSG00000275212	Coexpression with indicated gene
coexp_ENSG00000205976	Coexpression with indicated gene
coexp_ENSG00000282199	Coexpression with indicated gene
coexp_ENSG00000228021	Coexpression with indicated gene
coexp_ENSG00000259907	Coexpression with indicated gene
coexp_ENSG00000279256	Coexpression with indicated gene
coexp_ENSG00000162771	Coexpression with indicated gene
coexp_ENSG00000255175	Coexpression with indicated gene
coexp_ENSG00000234070	Coexpression with indicated gene
coexp_ENSG00000267011	Coexpression with indicated gene
coexp_ENSG00000243574	Coexpression with indicated gene
coexp_ENSG00000229294	Coexpression with indicated gene
coexp_ENSG00000102055	Coexpression with indicated gene
coexp_ENSG00000203933	Coexpression with indicated gene
coexp_ENSG00000255150	Coexpression with indicated gene
coexp_ENSG00000282996	Coexpression with indicated gene
coexp_ENSG00000218014	Coexpression with indicated gene
coexp_ENSG00000231043	Coexpression with indicated gene
coexp_ENSG00000231171	Coexpression with indicated gene
coexp_ENSG00000268530	Coexpression with indicated gene
coexp_ENSG00000242042	Coexpression with indicated gene
coexp_ENSG00000227599	Coexpression with indicated gene
coexp_ENSG00000153790	Coexpression with indicated gene
coexp_ENSG00000259928	Coexpression with indicated gene
coexp_ENSG00000274443	Coexpression with indicated gene
coexp_ENSG00000206113	Coexpression with indicated gene
coexp_ENSG00000268686	Coexpression with indicated gene
coexp_ENSG00000230533	Coexpression with indicated gene
coexp_ENSG00000204279	Coexpression with indicated gene
coexp_ENSG00000255181	Coexpression with indicated gene
coexp_ENSG00000244234	Coexpression with indicated gene
coexp_ENSG00000231597	Coexpression with indicated gene
coexp_ENSG00000249515	Coexpression with indicated gene
coexp_ENSG00000226287	Coexpression with indicated gene
coexp_ENSG00000224771	Coexpression with indicated gene
coexp_ENSG00000275265	Coexpression with indicated gene
coexp_ENSG00000235156	Coexpression with indicated gene
coexp_ENSG00000255159	Coexpression with indicated gene
coexp_ENSG00000225738	Coexpression with indicated gene
coexp_ENSG00000267626	Coexpression with indicated gene
coexp_ENSG00000181358	Coexpression with indicated gene
coexp_ENSG00000224582	Coexpression with indicated gene
coexp_ENSG00000234123	Coexpression with indicated gene
coexp_ENSG00000233277	Coexpression with indicated gene
coexp_ENSG00000229466	Coexpression with indicated gene
coexp_ENSG00000270624	Coexpression with indicated gene
coexp_ENSG00000267605	Coexpression with indicated gene
coexp_ENSG00000260338	Coexpression with indicated gene
coexp_ENSG00000279128	Coexpression with indicated gene
coexp_ENSG00000264595	Coexpression with indicated gene
coexp_ENSG00000239395	Coexpression with indicated gene
coexp_ENSG00000185056	Coexpression with indicated gene
coexp_ENSG00000259666	Coexpression with indicated gene
coexp_ENSG00000257725	Coexpression with indicated gene
coexp_ENSG00000187066	Coexpression with indicated gene
coexp_ENSG00000204979	Coexpression with indicated gene
coexp_ENSG00000269957	Coexpression with indicated gene
coexp_ENSG00000223570	Coexpression with indicated gene
coexp_ENSG00000172073	Coexpression with indicated gene
coexp_ENSG00000251234	Coexpression with indicated gene
coexp_ENSG00000254340	Coexpression with indicated gene
coexp_ENSG00000233048	Coexpression with indicated gene
coexp_ENSG00000127252	Coexpression with indicated gene
coexp_ENSG00000275875	Coexpression with indicated gene
coexp_ENSG00000180869	Coexpression with indicated gene
coexp_ENSG00000261176	Coexpression with indicated gene
coexp_ENSG00000258167	Coexpression with indicated gene
coexp_ENSG00000230403	Coexpression with indicated gene
coexp_ENSG00000224918	Coexpression with indicated gene
coexp_ENSG00000248478	Coexpression with indicated gene
coexp_ENSG00000181211	Coexpression with indicated gene
coexp_ENSG00000281365	Coexpression with indicated gene
coexp_ENSG00000136811	Coexpression with indicated gene
coexp_ENSG00000183035	Coexpression with indicated gene
coexp_ENSG00000231666	Coexpression with indicated gene
coexp_ENSG00000234629	Coexpression with indicated gene
coexp_ENSG00000172671	Coexpression with indicated gene
coexp_ENSG00000183206	Coexpression with indicated gene
coexp_ENSG00000226521	Coexpression with indicated gene
coexp_ENSG00000227713	Coexpression with indicated gene
coexp_ENSG00000231510	Coexpression with indicated gene
coexp_ENSG00000152936	Coexpression with indicated gene
coexp_ENSG00000256994	Coexpression with indicated gene
coexp_ENSG00000225979	Coexpression with indicated gene
coexp_ENSG00000253542	Coexpression with indicated gene
coexp_ENSG00000203520	Coexpression with indicated gene
coexp_ENSG00000181171	Coexpression with indicated gene
coexp_ENSG00000232080	Coexpression with indicated gene
coexp_ENSG00000238063	Coexpression with indicated gene
coexp_ENSG00000256311	Coexpression with indicated gene
coexp_ENSG00000179397	Coexpression with indicated gene
coexp_ENSG00000266885	Coexpression with indicated gene
coexp_ENSG00000237286	Coexpression with indicated gene
coexp_ENSG00000256739	Coexpression with indicated gene
coexp_ENSG00000182264	Coexpression with indicated gene
coexp_ENSG00000236799	Coexpression with indicated gene
coexp_ENSG00000241213	Coexpression with indicated gene
coexp_ENSG00000228430	Coexpression with indicated gene
coexp_ENSG00000265352	Coexpression with indicated gene
coexp_ENSG00000226485	Coexpression with indicated gene
coexp_ENSG00000229525	Coexpression with indicated gene
coexp_ENSG00000217950	Coexpression with indicated gene
coexp_ENSG00000225811	Coexpression with indicated gene
coexp_ENSG00000214686	Coexpression with indicated gene
coexp_ENSG00000205301	Coexpression with indicated gene
coexp_ENSG00000145309	Coexpression with indicated gene
coexp_ENSG00000231473	Coexpression with indicated gene
coexp_ENSG00000259648	Coexpression with indicated gene
coexp_ENSG00000227006	Coexpression with indicated gene
coexp_ENSG00000261296	Coexpression with indicated gene
coexp_ENSG00000272360	Coexpression with indicated gene
coexp_ENSG00000233321	Coexpression with indicated gene
coexp_ENSG00000213365	Coexpression with indicated gene
coexp_ENSG00000251688	Coexpression with indicated gene
coexp_ENSG00000249623	Coexpression with indicated gene
coexp_ENSG00000275179	Coexpression with indicated gene
coexp_ENSG00000226903	Coexpression with indicated gene
coexp_ENSG00000269622	Coexpression with indicated gene
coexp_ENSG00000258196	Coexpression with indicated gene
coexp_ENSG00000271682	Coexpression with indicated gene
coexp_ENSG00000250341	Coexpression with indicated gene
coexp_ENSG00000235733	Coexpression with indicated gene
coexp_ENSG00000254562	Coexpression with indicated gene
coexp_ENSG00000223581	Coexpression with indicated gene
coexp_ENSG00000232465	Coexpression with indicated gene
coexp_ENSG00000092850	Coexpression with indicated gene
coexp_ENSG00000228838	Coexpression with indicated gene
coexp_ENSG00000236769	Coexpression with indicated gene
coexp_ENSG00000266273	Coexpression with indicated gene
coexp_ENSG00000283434	Coexpression with indicated gene
coexp_ENSG00000265514	Coexpression with indicated gene
coexp_ENSG00000281219	Coexpression with indicated gene
coexp_ENSG00000260198	Coexpression with indicated gene
coexp_ENSG00000280415	Coexpression with indicated gene
coexp_ENSG00000167494	Coexpression with indicated gene
coexp_ENSG00000279494	Coexpression with indicated gene
coexp_ENSG00000171931	Coexpression with indicated gene
coexp_ENSG00000234232	Coexpression with indicated gene
coexp_ENSG00000257009	Coexpression with indicated gene
coexp_ENSG00000265766	Coexpression with indicated gene
coexp_ENSG00000232715	Coexpression with indicated gene
coexp_ENSG00000266733	Coexpression with indicated gene
coexp_ENSG00000215288	Coexpression with indicated gene
coexp_ENSG00000267204	Coexpression with indicated gene
coexp_ENSG00000225298	Coexpression with indicated gene
coexp_ENSG00000257164	Coexpression with indicated gene
coexp_ENSG00000279070	Coexpression with indicated gene
coexp_ENSG00000230697	Coexpression with indicated gene
coexp_ENSG00000237636	Coexpression with indicated gene
coexp_ENSG00000271134	Coexpression with indicated gene
coexp_ENSG00000238202	Coexpression with indicated gene
coexp_ENSG00000262031	Coexpression with indicated gene
coexp_ENSG00000257997	Coexpression with indicated gene
coexp_ENSG00000232401	Coexpression with indicated gene
coexp_ENSG00000199490	Coexpression with indicated gene
coexp_ENSG00000263485	Coexpression with indicated gene
coexp_ENSG00000265556	Coexpression with indicated gene
coexp_ENSG00000258647	Coexpression with indicated gene
coexp_ENSG00000266433	Coexpression with indicated gene
coexp_ENSG00000231304	Coexpression with indicated gene
coexp_ENSG00000231484	Coexpression with indicated gene
coexp_ENSG00000228503	Coexpression with indicated gene
coexp_ENSG00000226490	Coexpression with indicated gene
coexp_ENSG00000254111	Coexpression with indicated gene
coexp_ENSG00000260174	Coexpression with indicated gene
coexp_ENSG00000282160	Coexpression with indicated gene
coexp_ENSG00000224076	Coexpression with indicated gene
coexp_ENSG00000236519	Coexpression with indicated gene
coexp_ENSG00000212567	Coexpression with indicated gene
coexp_ENSG00000260213	Coexpression with indicated gene
coexp_ENSG00000248539	Coexpression with indicated gene
coexp_ENSG00000147183	Coexpression with indicated gene
coexp_ENSG00000259697	Coexpression with indicated gene
coexp_ENSG00000187979	Coexpression with indicated gene
coexp_ENSG00000161040	Coexpression with indicated gene
coexp_ENSG00000141946	Coexpression with indicated gene
coexp_ENSG00000253267	Coexpression with indicated gene
coexp_ENSG00000213180	Coexpression with indicated gene
coexp_ENSG00000267051	Coexpression with indicated gene
coexp_ENSG00000225919	Coexpression with indicated gene
coexp_ENSG00000276487	Coexpression with indicated gene
coexp_ENSG00000100249	Coexpression with indicated gene
coexp_ENSG00000237461	Coexpression with indicated gene
coexp_ENSG00000136206	Coexpression with indicated gene
coexp_ENSG00000260223	Coexpression with indicated gene
coexp_ENSG00000198754	Coexpression with indicated gene
coexp_ENSG00000168026	Coexpression with indicated gene
coexp_ENSG00000224532	Coexpression with indicated gene
coexp_ENSG00000225767	Coexpression with indicated gene
coexp_ENSG00000187772	Coexpression with indicated gene
coexp_ENSG00000144395	Coexpression with indicated gene
coexp_ENSG00000260765	Coexpression with indicated gene
coexp_ENSG00000180663	Coexpression with indicated gene
coexp_ENSG00000204652	Coexpression with indicated gene
coexp_ENSG00000197214	Coexpression with indicated gene
coexp_ENSG00000177992	Coexpression with indicated gene
coexp_ENSG00000230408	Coexpression with indicated gene
coexp_ENSG00000254180	Coexpression with indicated gene
coexp_ENSG00000249865	Coexpression with indicated gene
coexp_ENSG00000185523	Coexpression with indicated gene
coexp_ENSG00000265128	Coexpression with indicated gene
coexp_ENSG00000145757	Coexpression with indicated gene
coexp_ENSG00000176515	Coexpression with indicated gene
coexp_ENSG00000215529	Coexpression with indicated gene
coexp_ENSG00000226627	Coexpression with indicated gene
coexp_ENSG00000239377	Coexpression with indicated gene
coexp_ENSG00000223839	Coexpression with indicated gene
coexp_ENSG00000223587	Coexpression with indicated gene
coexp_ENSG00000260780	Coexpression with indicated gene
coexp_ENSG00000163263	Coexpression with indicated gene
coexp_ENSG00000172967	Coexpression with indicated gene
coexp_ENSG00000237222	Coexpression with indicated gene
coexp_ENSG00000277020	Coexpression with indicated gene
coexp_ENSG00000185156	Coexpression with indicated gene
coexp_ENSG00000235538	Coexpression with indicated gene
coexp_ENSG00000236355	Coexpression with indicated gene
coexp_ENSG00000245662	Coexpression with indicated gene
coexp_ENSG00000261638	Coexpression with indicated gene
coexp_ENSG00000249244	Coexpression with indicated gene
coexp_ENSG00000234148	Coexpression with indicated gene
coexp_ENSG00000169126	Coexpression with indicated gene
coexp_ENSG00000234139	Coexpression with indicated gene
coexp_ENSG00000237460	Coexpression with indicated gene
coexp_ENSG00000249713	Coexpression with indicated gene
coexp_ENSG00000230250	Coexpression with indicated gene
coexp_ENSG00000273756	Coexpression with indicated gene
coexp_ENSG00000249467	Coexpression with indicated gene
coexp_ENSG00000279516	Coexpression with indicated gene
coexp_ENSG00000253238	Coexpression with indicated gene
coexp_ENSG00000255388	Coexpression with indicated gene
coexp_ENSG00000258718	Coexpression with indicated gene
coexp_ENSG00000227911	Coexpression with indicated gene
coexp_ENSG00000204117	Coexpression with indicated gene
coexp_ENSG00000215866	Coexpression with indicated gene
coexp_ENSG00000181781	Coexpression with indicated gene
coexp_ENSG00000231953	Coexpression with indicated gene
coexp_ENSG00000133101	Coexpression with indicated gene
coexp_ENSG00000214278	Coexpression with indicated gene
coexp_ENSG00000161609	Coexpression with indicated gene
coexp_ENSG00000226367	Coexpression with indicated gene
coexp_ENSG00000253377	Coexpression with indicated gene
coexp_ENSG00000260268	Coexpression with indicated gene
coexp_ENSG00000237378	Coexpression with indicated gene
coexp_ENSG00000248473	Coexpression with indicated gene
coexp_ENSG00000277837	Coexpression with indicated gene
coexp_ENSG00000233694	Coexpression with indicated gene
coexp_ENSG00000267448	Coexpression with indicated gene
coexp_ENSG00000253834	Coexpression with indicated gene
coexp_ENSG00000242753	Coexpression with indicated gene
coexp_ENSG00000263089	Coexpression with indicated gene
coexp_ENSG00000216624	Coexpression with indicated gene
coexp_ENSG00000205111	Coexpression with indicated gene
coexp_ENSG00000100218	Coexpression with indicated gene
coexp_ENSG00000255279	Coexpression with indicated gene
coexp_ENSG00000261703	Coexpression with indicated gene
coexp_ENSG00000241149	Coexpression with indicated gene
coexp_ENSG00000180116	Coexpression with indicated gene
coexp_ENSG00000174016	Coexpression with indicated gene
coexp_ENSG00000273720	Coexpression with indicated gene
coexp_ENSG00000261501	Coexpression with indicated gene
coexp_ENSG00000258854	Coexpression with indicated gene
coexp_ENSG00000233173	Coexpression with indicated gene
coexp_ENSG00000235489	Coexpression with indicated gene
coexp_ENSG00000164900	Coexpression with indicated gene
coexp_ENSG00000163046	Coexpression with indicated gene
coexp_ENSG00000233533	Coexpression with indicated gene
coexp_ENSG00000230226	Coexpression with indicated gene
coexp_ENSG00000254224	Coexpression with indicated gene
coexp_ENSG00000233395	Coexpression with indicated gene
coexp_ENSG00000204398	Coexpression with indicated gene
coexp_ENSG00000164645	Coexpression with indicated gene
coexp_ENSG00000256659	Coexpression with indicated gene
coexp_ENSG00000236052	Coexpression with indicated gene
coexp_ENSG00000214553	Coexpression with indicated gene
coexp_ENSG00000248525	Coexpression with indicated gene
coexp_ENSG00000204915	Coexpression with indicated gene
coexp_ENSG00000198156	Coexpression with indicated gene
coexp_ENSG00000203684	Coexpression with indicated gene
coexp_ENSG00000216817	Coexpression with indicated gene
coexp_ENSG00000245768	Coexpression with indicated gene
coexp_ENSG00000178795	Coexpression with indicated gene
coexp_ENSG00000232871	Coexpression with indicated gene
coexp_ENSG00000257603	Coexpression with indicated gene
coexp_ENSG00000148832	Coexpression with indicated gene
coexp_ENSG00000224540	Coexpression with indicated gene
coexp_ENSG00000225334	Coexpression with indicated gene
coexp_ENSG00000272406	Coexpression with indicated gene
coexp_ENSG00000231616	Coexpression with indicated gene
coexp_ENSG00000214558	Coexpression with indicated gene
coexp_ENSG00000251165	Coexpression with indicated gene
coexp_ENSG00000251172	Coexpression with indicated gene
coexp_ENSG00000161860	Coexpression with indicated gene
coexp_ENSG00000203778	Coexpression with indicated gene
coexp_ENSG00000267872	Coexpression with indicated gene
coexp_ENSG00000250078	Coexpression with indicated gene
coexp_ENSG00000280225	Coexpression with indicated gene
coexp_ENSG00000230157	Coexpression with indicated gene
coexp_ENSG00000158423	Coexpression with indicated gene
coexp_ENSG00000265345	Coexpression with indicated gene
coexp_ENSG00000224794	Coexpression with indicated gene
coexp_ENSG00000267789	Coexpression with indicated gene
coexp_ENSG00000255790	Coexpression with indicated gene
coexp_ENSG00000181609	Coexpression with indicated gene
coexp_ENSG00000249490	Coexpression with indicated gene
coexp_ENSG00000233787	Coexpression with indicated gene
coexp_ENSG00000236048	Coexpression with indicated gene
coexp_ENSG00000278908	Coexpression with indicated gene
coexp_ENSG00000242973	Coexpression with indicated gene
coexp_ENSG00000196388	Coexpression with indicated gene
coexp_ENSG00000229750	Coexpression with indicated gene
coexp_ENSG00000281778	Coexpression with indicated gene
coexp_ENSG00000253489	Coexpression with indicated gene
coexp_ENSG00000258630	Coexpression with indicated gene
coexp_ENSG00000283709	Coexpression with indicated gene
coexp_ENSG00000153495	Coexpression with indicated gene
coexp_ENSG00000241544	Coexpression with indicated gene
coexp_ENSG00000259349	Coexpression with indicated gene
coexp_ENSG00000205634	Coexpression with indicated gene
coexp_ENSG00000255425	Coexpression with indicated gene
coexp_ENSG00000234634	Coexpression with indicated gene
coexp_ENSG00000235958	Coexpression with indicated gene
coexp_ENSG00000233246	Coexpression with indicated gene
coexp_ENSG00000157343	Coexpression with indicated gene
coexp_ENSG00000230131	Coexpression with indicated gene
coexp_ENSG00000267311	Coexpression with indicated gene
coexp_ENSG00000125388	Coexpression with indicated gene
coexp_ENSG00000257752	Coexpression with indicated gene
coexp_ENSG00000268326	Coexpression with indicated gene
coexp_ENSG00000204188	Coexpression with indicated gene
coexp_ENSG00000227290	Coexpression with indicated gene
coexp_ENSG00000224563	Coexpression with indicated gene
coexp_ENSG00000248138	Coexpression with indicated gene
coexp_ENSG00000225166	Coexpression with indicated gene
coexp_ENSG00000265000	Coexpression with indicated gene
coexp_ENSG00000177947	Coexpression with indicated gene
coexp_ENSG00000254262	Coexpression with indicated gene
coexp_ENSG00000204694	Coexpression with indicated gene
coexp_ENSG00000232342	Coexpression with indicated gene
coexp_ENSG00000246379	Coexpression with indicated gene
coexp_ENSG00000227938	Coexpression with indicated gene
coexp_ENSG00000230523	Coexpression with indicated gene
coexp_ENSG00000229188	Coexpression with indicated gene
coexp_ENSG00000228288	Coexpression with indicated gene
coexp_ENSG00000131379	Coexpression with indicated gene
coexp_ENSG00000206531	Coexpression with indicated gene
coexp_ENSG00000176563	Coexpression with indicated gene
coexp_ENSG00000280414	Coexpression with indicated gene
coexp_ENSG00000251250	Coexpression with indicated gene
coexp_ENSG00000224173	Coexpression with indicated gene
coexp_ENSG00000273106	Coexpression with indicated gene
coexp_ENSG00000225684	Coexpression with indicated gene
coexp_ENSG00000254334	Coexpression with indicated gene
coexp_ENSG00000224424	Coexpression with indicated gene
coexp_ENSG00000167195	Coexpression with indicated gene
coexp_ENSG00000271991	Coexpression with indicated gene
coexp_ENSG00000196184	Coexpression with indicated gene
coexp_ENSG00000224865	Coexpression with indicated gene
coexp_ENSG00000261400	Coexpression with indicated gene
coexp_ENSG00000237986	Coexpression with indicated gene
coexp_ENSG00000253139	Coexpression with indicated gene
coexp_ENSG00000227098	Coexpression with indicated gene
coexp_ENSG00000260907	Coexpression with indicated gene
coexp_ENSG00000231876	Coexpression with indicated gene
coexp_ENSG00000243499	Coexpression with indicated gene
coexp_ENSG00000188032	Coexpression with indicated gene
coexp_ENSG00000254630	Coexpression with indicated gene
coexp_ENSG00000279658	Coexpression with indicated gene
coexp_ENSG00000250447	Coexpression with indicated gene
coexp_ENSG00000241721	Coexpression with indicated gene
coexp_ENSG00000258912	Coexpression with indicated gene
coexp_ENSG00000229249	Coexpression with indicated gene
coexp_ENSG00000253141	Coexpression with indicated gene
[truncated: 4,004 more rows]

## Sheet: gene_regulatory_features
Column name	Description
EDS	Enhancer domain score
ABC_count1	Number of biosamples with an active ABC enhancer
ABC_count2	Total number of ABC enhancers across all biosamples
ABC_count3	Total number of ABC enhancers after taking the union of all enhancer domains
ABC_length	Total length of ABC enhancers after taking the union of all enhancer domains
ABC_length_per_type	Average total ABC enhancer length in an active cell type
Roadmap_count1	Number of biosamples with an active Roadmap enhancer
Roadmap_count2	Total number of Roadmap enhancers across all biosamples
Roadmap_count3	Total number of Roadmap enhancers after taking the union of all enhancer domains
Roadmap_length	Total length of Roadmap enhancers after taking the union of all enhancer domains
Roadmap_length_per_type	Average total Roadmap enhancer length in an active cell type
promoter_count	Number of promoters
ABC_0_count	Number of ABC enhancers linked to the gene in one biosample
ABC_1_count	Number of ABC enhancers linked to the gene in one biosample
ABC_2_count	Number of ABC enhancers linked to the gene in one biosample
ABC_3_count	Number of ABC enhancers linked to the gene in one biosample
ABC_4_count	Number of ABC enhancers linked to the gene in one biosample
ABC_5_count	Number of ABC enhancers linked to the gene in one biosample
ABC_6_count	Number of ABC enhancers linked to the gene in one biosample
ABC_7_count	Number of ABC enhancers linked to the gene in one biosample
ABC_8_count	Number of ABC enhancers linked to the gene in one biosample
ABC_9_count	Number of ABC enhancers linked to the gene in one biosample
ABC_10_count	Number of ABC enhancers linked to the gene in one biosample
ABC_11_count	Number of ABC enhancers linked to the gene in one biosample
ABC_12_count	Number of ABC enhancers linked to the gene in one biosample
ABC_13_count	Number of ABC enhancers linked to the gene in one biosample
ABC_14_count	Number of ABC enhancers linked to the gene in one biosample
ABC_15_count	Number of ABC enhancers linked to the gene in one biosample
ABC_16_count	Number of ABC enhancers linked to the gene in one biosample
ABC_17_count	Number of ABC enhancers linked to the gene in one biosample
ABC_18_count	Number of ABC enhancers linked to the gene in one biosample
ABC_19_count	Number of ABC enhancers linked to the gene in one biosample
ABC_20_count	Number of ABC enhancers linked to the gene in one biosample
ABC_21_count	Number of ABC enhancers linked to the gene in one biosample
ABC_22_count	Number of ABC enhancers linked to the gene in one biosample
ABC_23_count	Number of ABC enhancers linked to the gene in one biosample
ABC_24_count	Number of ABC enhancers linked to the gene in one biosample
ABC_25_count	Number of ABC enhancers linked to the gene in one biosample
ABC_26_count	Number of ABC enhancers linked to the gene in one biosample
ABC_27_count	Number of ABC enhancers linked to the gene in one biosample
ABC_28_count	Number of ABC enhancers linked to the gene in one biosample
ABC_29_count	Number of ABC enhancers linked to the gene in one biosample
ABC_30_count	Number of ABC enhancers linked to the gene in one biosample
ABC_31_count	Number of ABC enhancers linked to the gene in one biosample
ABC_32_count	Number of ABC enhancers linked to the gene in one biosample
ABC_33_count	Number of ABC enhancers linked to the gene in one biosample
ABC_34_count	Number of ABC enhancers linked to the gene in one biosample
ABC_35_count	Number of ABC enhancers linked to the gene in one biosample
ABC_36_count	Number of ABC enhancers linked to the gene in one biosample
ABC_37_count	Number of ABC enhancers linked to the gene in one biosample
ABC_38_count	Number of ABC enhancers linked to the gene in one biosample
ABC_39_count	Number of ABC enhancers linked to the gene in one biosample
ABC_40_count	Number of ABC enhancers linked to the gene in one biosample
ABC_41_count	Number of ABC enhancers linked to the gene in one biosample
ABC_42_count	Number of ABC enhancers linked to the gene in one biosample
ABC_43_count	Number of ABC enhancers linked to the gene in one biosample
ABC_44_count	Number of ABC enhancers linked to the gene in one biosample
ABC_45_count	Number of ABC enhancers linked to the gene in one biosample
ABC_46_count	Number of ABC enhancers linked to the gene in one biosample
ABC_47_count	Number of ABC enhancers linked to the gene in one biosample
ABC_48_count	Number of ABC enhancers linked to the gene in one biosample
ABC_49_count	Number of ABC enhancers linked to the gene in one biosample
ABC_50_count	Number of ABC enhancers linked to the gene in one biosample
ABC_51_count	Number of ABC enhancers linked to the gene in one biosample
ABC_52_count	Number of ABC enhancers linked to the gene in one biosample
ABC_53_count	Number of ABC enhancers linked to the gene in one biosample
ABC_54_count	Number of ABC enhancers linked to the gene in one biosample
ABC_55_count	Number of ABC enhancers linked to the gene in one biosample
ABC_56_count	Number of ABC enhancers linked to the gene in one biosample
ABC_57_count	Number of ABC enhancers linked to the gene in one biosample
ABC_58_count	Number of ABC enhancers linked to the gene in one biosample
ABC_59_count	Number of ABC enhancers linked to the gene in one biosample
ABC_60_count	Number of ABC enhancers linked to the gene in one biosample
ABC_61_count	Number of ABC enhancers linked to the gene in one biosample
ABC_62_count	Number of ABC enhancers linked to the gene in one biosample
ABC_63_count	Number of ABC enhancers linked to the gene in one biosample
ABC_64_count	Number of ABC enhancers linked to the gene in one biosample
ABC_65_count	Number of ABC enhancers linked to the gene in one biosample
ABC_66_count	Number of ABC enhancers linked to the gene in one biosample
ABC_67_count	Number of ABC enhancers linked to the gene in one biosample
ABC_68_count	Number of ABC enhancers linked to the gene in one biosample
ABC_69_count	Number of ABC enhancers linked to the gene in one biosample
ABC_70_count	Number of ABC enhancers linked to the gene in one biosample
ABC_71_count	Number of ABC enhancers linked to the gene in one biosample
ABC_72_count	Number of ABC enhancers linked to the gene in one biosample
ABC_73_count	Number of ABC enhancers linked to the gene in one biosample
ABC_74_count	Number of ABC enhancers linked to the gene in one biosample
ABC_75_count	Number of ABC enhancers linked to the gene in one biosample
ABC_76_count	Number of ABC enhancers linked to the gene in one biosample
ABC_77_count	Number of ABC enhancers linked to the gene in one biosample
ABC_78_count	Number of ABC enhancers linked to the gene in one biosample
ABC_79_count	Number of ABC enhancers linked to the gene in one biosample
ABC_80_count	Number of ABC enhancers linked to the gene in one biosample
ABC_81_count	Number of ABC enhancers linked to the gene in one biosample
ABC_82_count	Number of ABC enhancers linked to the gene in one biosample
ABC_83_count	Number of ABC enhancers linked to the gene in one biosample
ABC_84_count	Number of ABC enhancers linked to the gene in one biosample
ABC_85_count	Number of ABC enhancers linked to the gene in one biosample
ABC_86_count	Number of ABC enhancers linked to the gene in one biosample
ABC_87_count	Number of ABC enhancers linked to the gene in one biosample
ABC_88_count	Number of ABC enhancers linked to the gene in one biosample
ABC_89_count	Number of ABC enhancers linked to the gene in one biosample
ABC_90_count	Number of ABC enhancers linked to the gene in one biosample
ABC_91_count	Number of ABC enhancers linked to the gene in one biosample
ABC_92_count	Number of ABC enhancers linked to the gene in one biosample
ABC_93_count	Number of ABC enhancers linked to the gene in one biosample
ABC_94_count	Number of ABC enhancers linked to the gene in one biosample
ABC_95_count	Number of ABC enhancers linked to the gene in one biosample
ABC_96_count	Number of ABC enhancers linked to the gene in one biosample
ABC_97_count	Number of ABC enhancers linked to the gene in one biosample
ABC_98_count	Number of ABC enhancers linked to the gene in one biosample
ABC_99_count	Number of ABC enhancers linked to the gene in one biosample
ABC_100_count	Number of ABC enhancers linked to the gene in one biosample
ABC_101_count	Number of ABC enhancers linked to the gene in one biosample
ABC_102_count	Number of ABC enhancers linked to the gene in one biosample
ABC_103_count	Number of ABC enhancers linked to the gene in one biosample
ABC_104_count	Number of ABC enhancers linked to the gene in one biosample
ABC_105_count	Number of ABC enhancers linked to the gene in one biosample
ABC_106_count	Number of ABC enhancers linked to the gene in one biosample
ABC_107_count	Number of ABC enhancers linked to the gene in one biosample
ABC_108_count	Number of ABC enhancers linked to the gene in one biosample
ABC_109_count	Number of ABC enhancers linked to the gene in one biosample
ABC_110_count	Number of ABC enhancers linked to the gene in one biosample
ABC_111_count	Number of ABC enhancers linked to the gene in one biosample
ABC_112_count	Number of ABC enhancers linked to the gene in one biosample
ABC_113_count	Number of ABC enhancers linked to the gene in one biosample
ABC_114_count	Number of ABC enhancers linked to the gene in one biosample
ABC_115_count	Number of ABC enhancers linked to the gene in one biosample
ABC_116_count	Number of ABC enhancers linked to the gene in one biosample
ABC_117_count	Number of ABC enhancers linked to the gene in one biosample
ABC_118_count	Number of ABC enhancers linked to the gene in one biosample
ABC_119_count	Number of ABC enhancers linked to the gene in one biosample
ABC_120_count	Number of ABC enhancers linked to the gene in one biosample
ABC_121_count	Number of ABC enhancers linked to the gene in one biosample
ABC_122_count	Number of ABC enhancers linked to the gene in one biosample
ABC_123_count	Number of ABC enhancers linked to the gene in one biosample
ABC_124_count	Number of ABC enhancers linked to the gene in one biosample
ABC_125_count	Number of ABC enhancers linked to the gene in one biosample
ABC_126_count	Number of ABC enhancers linked to the gene in one biosample
ABC_127_count	Number of ABC enhancers linked to the gene in one biosample
ABC_128_count	Number of ABC enhancers linked to the gene in one biosample
ABC_129_count	Number of ABC enhancers linked to the gene in one biosample
ABC_130_count	Number of ABC enhancers linked to the gene in one biosample
ABC_0_score	Total score of ABC enhancers linked to the gene in one biosample
ABC_1_score	Total score of ABC enhancers linked to the gene in one biosample
ABC_2_score	Total score of ABC enhancers linked to the gene in one biosample
ABC_3_score	Total score of ABC enhancers linked to the gene in one biosample
ABC_4_score	Total score of ABC enhancers linked to the gene in one biosample
ABC_5_score	Total score of ABC enhancers linked to the gene in one biosample
ABC_6_score	Total score of ABC enhancers linked to the gene in one biosample
ABC_7_score	Total score of ABC enhancers linked to the gene in one biosample
ABC_8_score	Total score of ABC enhancers linked to the gene in one biosample
ABC_9_score	Total score of ABC enhancers linked to the gene in one biosample
ABC_10_score	Total score of ABC enhancers linked to the gene in one biosample
ABC_11_score	Total score of ABC enhancers linked to the gene in one biosample
ABC_12_score	Total score of ABC enhancers linked to the gene in one biosample
ABC_13_score	Total score of ABC enhancers linked to the gene in one biosample
ABC_14_score	Total score of ABC enhancers linked to the gene in one biosample
ABC_15_score	Total score of ABC enhancers linked to the gene in one biosample
ABC_16_score	Total score of ABC enhancers linked to the gene in one biosample
ABC_17_score	Total score of ABC enhancers linked to the gene in one biosample
ABC_18_score	Total score of ABC enhancers linked to the gene in one biosample
ABC_19_score	Total score of ABC enhancers linked to the gene in one biosample
ABC_20_score	Total score of ABC enhancers linked to the gene in one biosample
ABC_21_score	Total score of ABC enhancers linked to the gene in one biosample
ABC_22_score	Total score of ABC enhancers linked to the gene in one biosample
ABC_23_score	Total score of ABC enhancers linked to the gene in one biosample
ABC_24_score	Total score of ABC enhancers linked to the gene in one biosample
ABC_25_score	Total score of ABC enhancers linked to the gene in one biosample
ABC_26_score	Total score of ABC enhancers linked to the gene in one biosample
ABC_27_score	Total score of ABC enhancers linked to the gene in one biosample
ABC_28_score	Total score of ABC enhancers linked to the gene in one biosample
ABC_29_score	Total score of ABC enhancers linked to the gene in one biosample
ABC_30_score	Total score of ABC enhancers linked to the gene in one biosample
ABC_31_score	Total score of ABC enhancers linked to the gene in one biosample
ABC_32_score	Total score of ABC enhancers linked to the gene in one biosample
ABC_33_score	Total score of ABC enhancers linked to the gene in one biosample
ABC_34_score	Total score of ABC enhancers linked to the gene in one biosample
ABC_35_score	Total score of ABC enhancers linked to the gene in one biosample
ABC_36_score	Total score of ABC enhancers linked to the gene in one biosample
ABC_37_score	Total score of ABC enhancers linked to the gene in one biosample
ABC_38_score	Total score of ABC enhancers linked to the gene in one biosample
ABC_39_score	Total score of ABC enhancers linked to the gene in one biosample
ABC_40_score	Total score of ABC enhancers linked to the gene in one biosample
ABC_41_score	Total score of ABC enhancers linked to the gene in one biosample
ABC_42_score	Total score of ABC enhancers linked to the gene in one biosample
ABC_43_score	Total score of ABC enhancers linked to the gene in one biosample
ABC_44_score	Total score of ABC enhancers linked to the gene in one biosample
ABC_45_score	Total score of ABC enhancers linked to the gene in one biosample
ABC_46_score	Total score of ABC enhancers linked to the gene in one biosample
ABC_47_score	Total score of ABC enhancers linked to the gene in one biosample
ABC_48_score	Total score of ABC enhancers linked to the gene in one biosample
ABC_49_score	Total score of ABC enhancers linked to the gene in one biosample
ABC_50_score	Total score of ABC enhancers linked to the gene in one biosample
ABC_51_score	Total score of ABC enhancers linked to the gene in one biosample
ABC_52_score	Total score of ABC enhancers linked to the gene in one biosample
ABC_53_score	Total score of ABC enhancers linked to the gene in one biosample
ABC_54_score	Total score of ABC enhancers linked to the gene in one biosample
ABC_55_score	Total score of ABC enhancers linked to the gene in one biosample
ABC_56_score	Total score of ABC enhancers linked to the gene in one biosample
ABC_57_score	Total score of ABC enhancers linked to the gene in one biosample
ABC_58_score	Total score of ABC enhancers linked to the gene in one biosample
ABC_59_score	Total score of ABC enhancers linked to the gene in one biosample
ABC_60_score	Total score of ABC enhancers linked to the gene in one biosample
ABC_61_score	Total score of ABC enhancers linked to the gene in one biosample
ABC_62_score	Total score of ABC enhancers linked to the gene in one biosample
ABC_63_score	Total score of ABC enhancers linked to the gene in one biosample
ABC_64_score	Total score of ABC enhancers linked to the gene in one biosample
ABC_65_score	Total score of ABC enhancers linked to the gene in one biosample
ABC_66_score	Total score of ABC enhancers linked to the gene in one biosample
ABC_67_score	Total score of ABC enhancers linked to the gene in one biosample
ABC_68_score	Total score of ABC enhancers linked to the gene in one biosample
ABC_69_score	Total score of ABC enhancers linked to the gene in one biosample
ABC_70_score	Total score of ABC enhancers linked to the gene in one biosample
ABC_71_score	Total score of ABC enhancers linked to the gene in one biosample
ABC_72_score	Total score of ABC enhancers linked to the gene in one biosample
ABC_73_score	Total score of ABC enhancers linked to the gene in one biosample
ABC_74_score	Total score of ABC enhancers linked to the gene in one biosample
ABC_75_score	Total score of ABC enhancers linked to the gene in one biosample
ABC_76_score	Total score of ABC enhancers linked to the gene in one biosample
ABC_77_score	Total score of ABC enhancers linked to the gene in one biosample
ABC_78_score	Total score of ABC enhancers linked to the gene in one biosample
ABC_79_score	Total score of ABC enhancers linked to the gene in one biosample
ABC_80_score	Total score of ABC enhancers linked to the gene in one biosample
ABC_81_score	Total score of ABC enhancers linked to the gene in one biosample
ABC_82_score	Total score of ABC enhancers linked to the gene in one biosample
ABC_83_score	Total score of ABC enhancers linked to the gene in one biosample
ABC_84_score	Total score of ABC enhancers linked to the gene in one biosample
ABC_85_score	Total score of ABC enhancers linked to the gene in one biosample
ABC_86_score	Total score of ABC enhancers linked to the gene in one biosample
ABC_87_score	Total score of ABC enhancers linked to the gene in one biosample
ABC_88_score	Total score of ABC enhancers linked to the gene in one biosample
ABC_89_score	Total score of ABC enhancers linked to the gene in one biosample
ABC_90_score	Total score of ABC enhancers linked to the gene in one biosample
[truncated: 171 more rows]

## Sheet: conservation_features
Column name	Description
[truncated: 14 more rows]

[truncated: 4 more sheets: protein_embedding_features, subcell_localization_features, missense_constraint_features, x_chromosome_features]
